# Supplementary material for: Separating the effects of water quality and urbanization on temperate insectivorous bats at the landscape scale
Source: PubMed Central journal article supplement (PMC5756845; doi:10.1002/ece3.3693), 2017-12-03

*Eptesicus fuscus*

**Trace of (Intercept)**

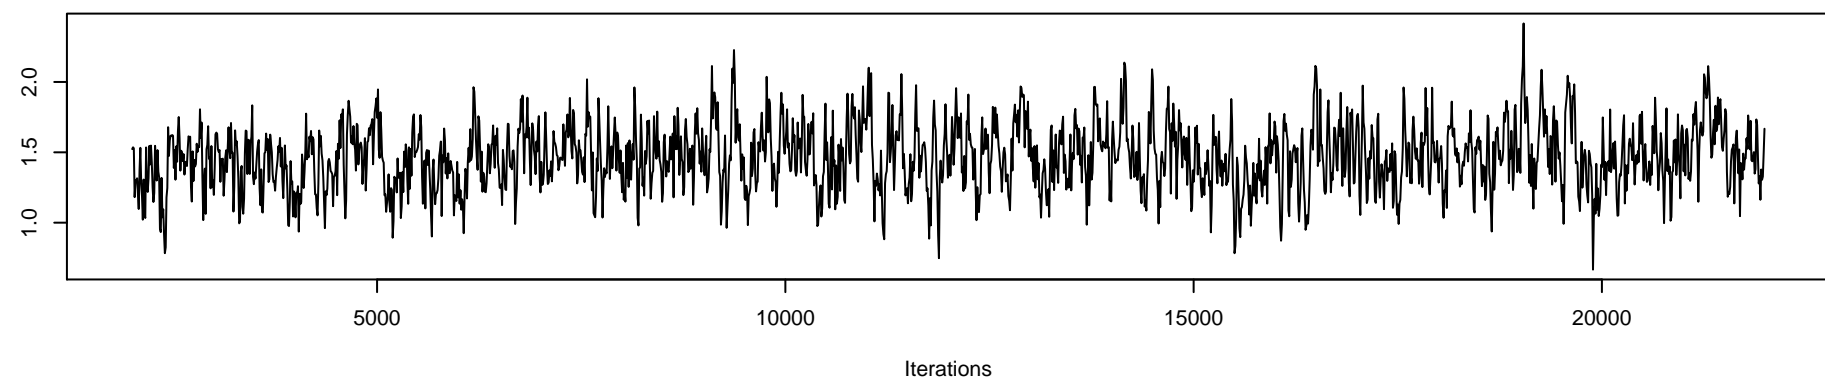

**Density of (Intercept)**

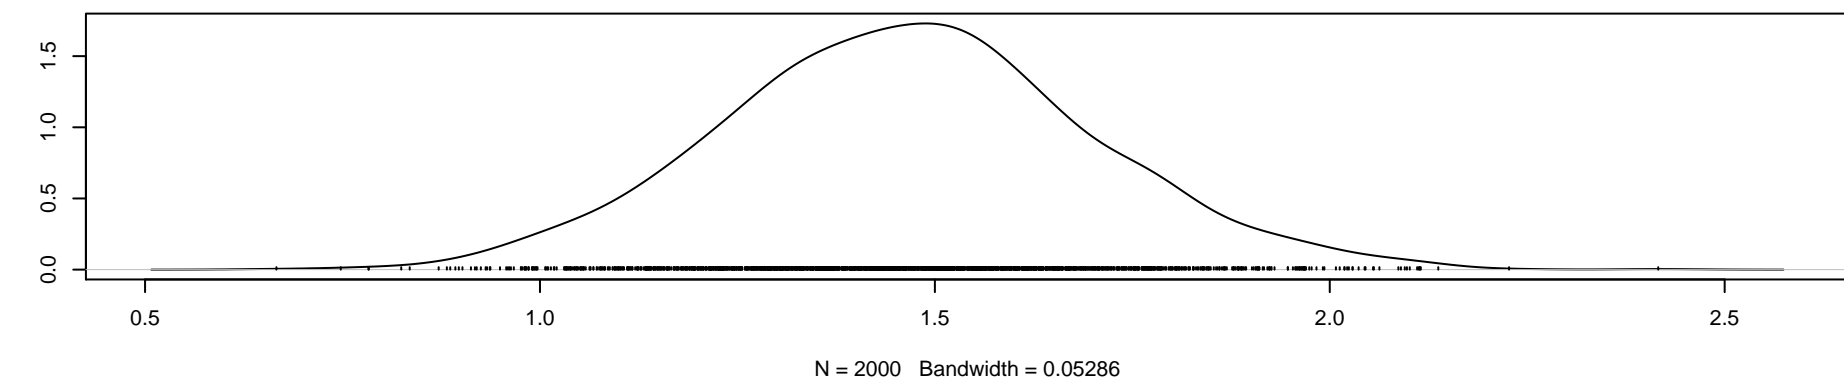

**Trace of quality2-good**

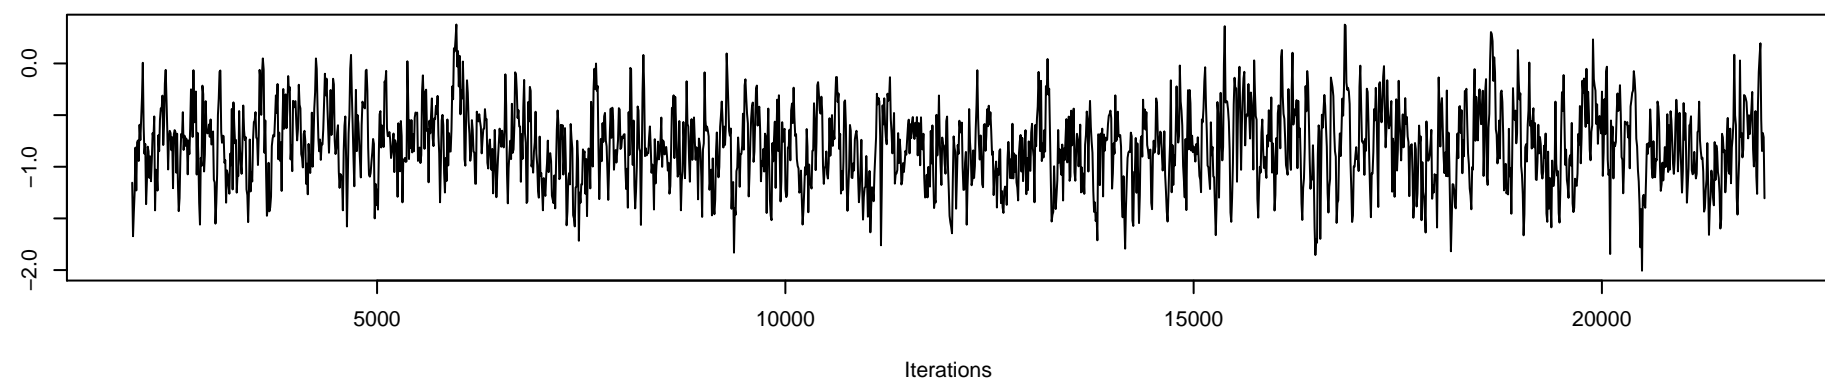

**Density of quality2-good**

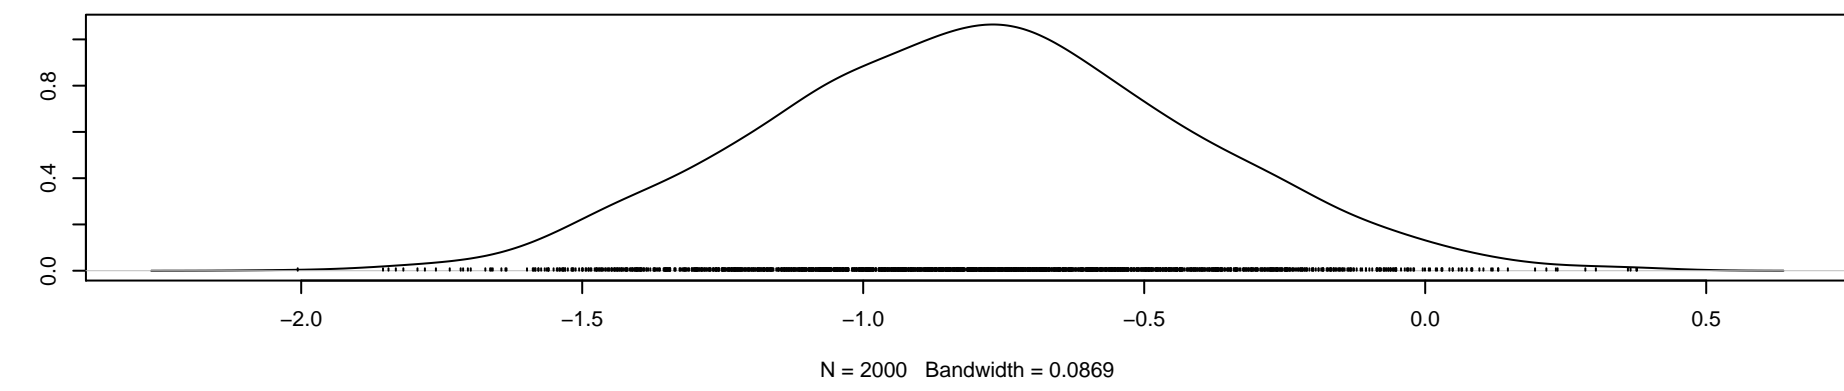

**Trace of quality3-goodfair**

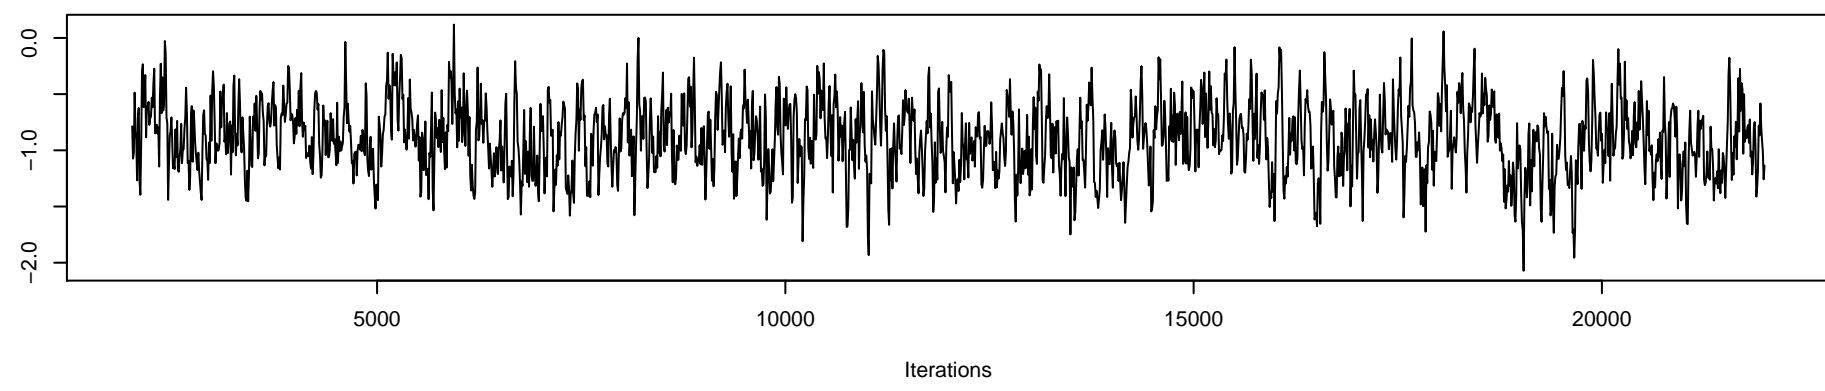

**Density of quality3-goodfair**

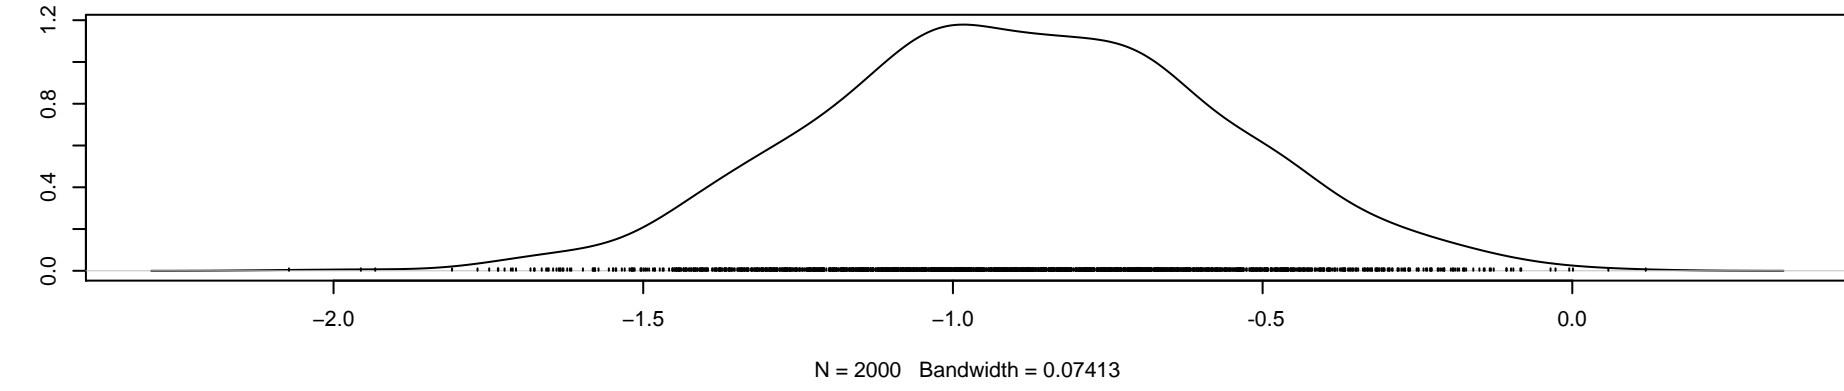

**Trace of quality4-fair**

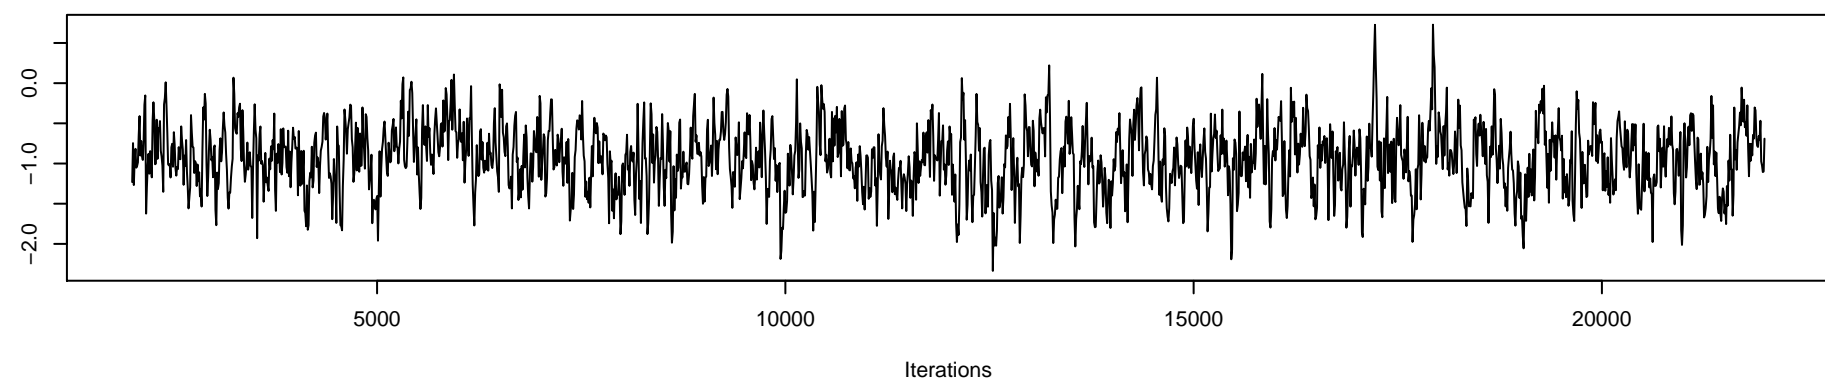

**Density of quality4-fair**

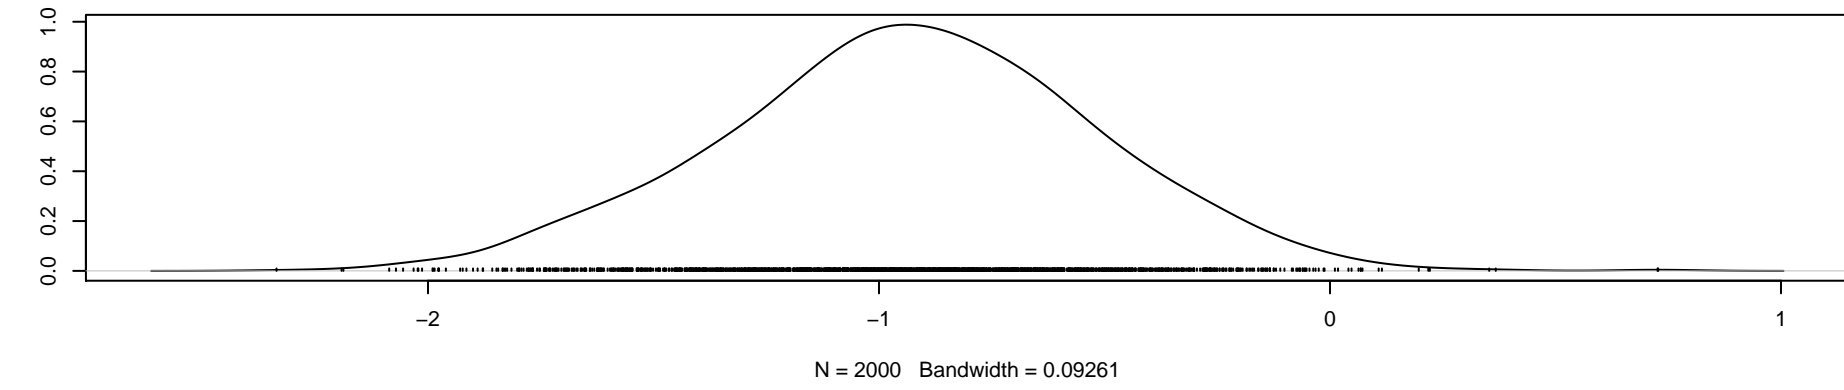

*Lasiurus borealis*

**Trace of (Intercept)**

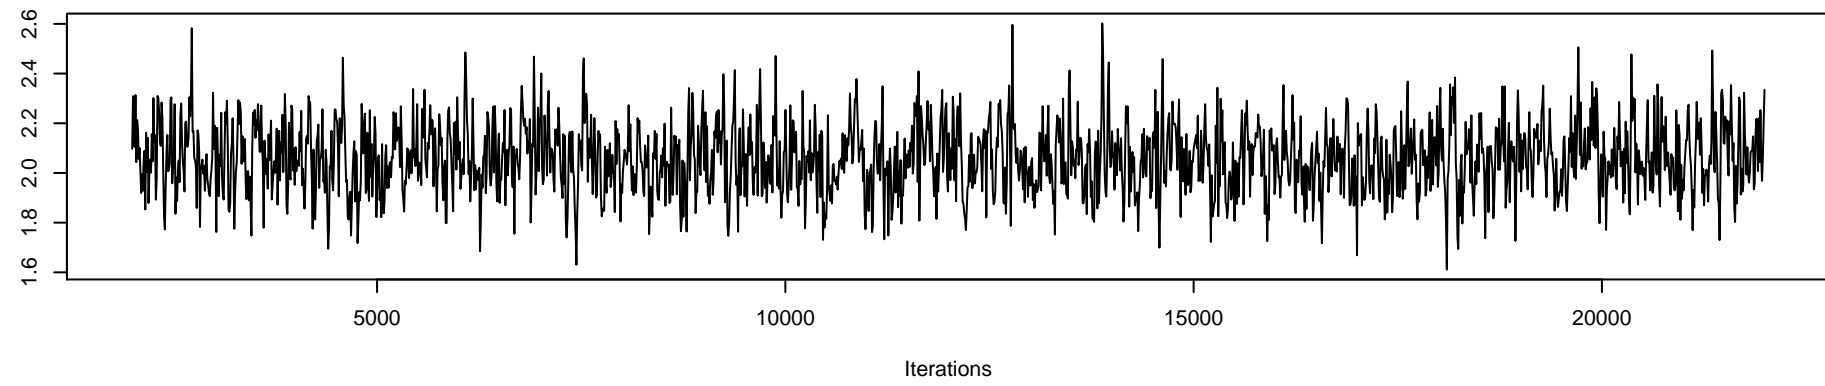

**Density of (Intercept)**

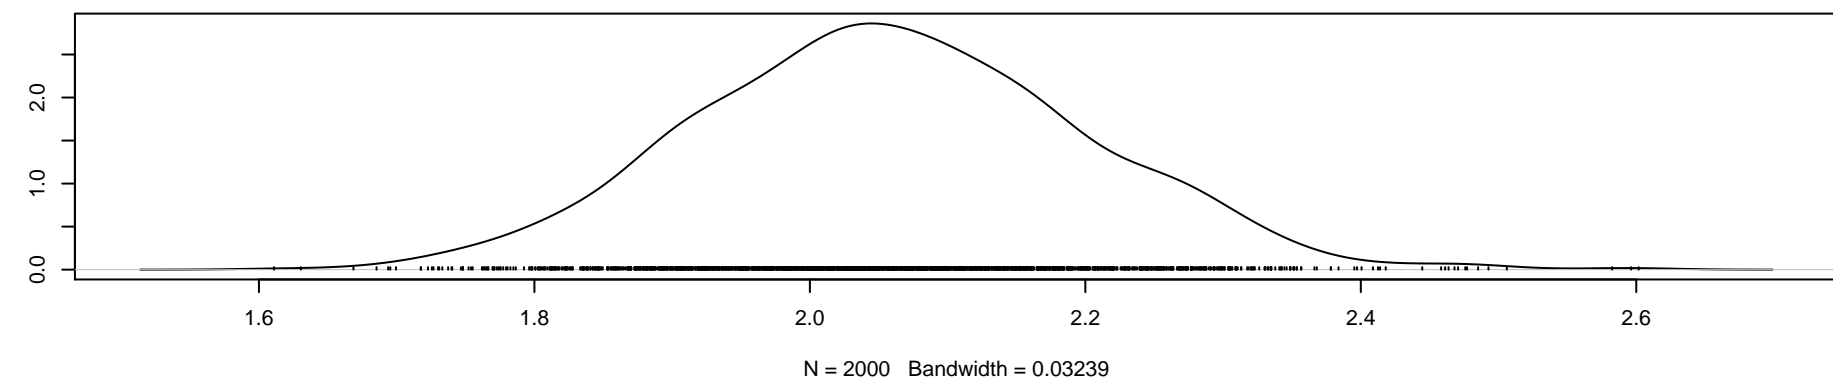

**Trace of quality2-good**

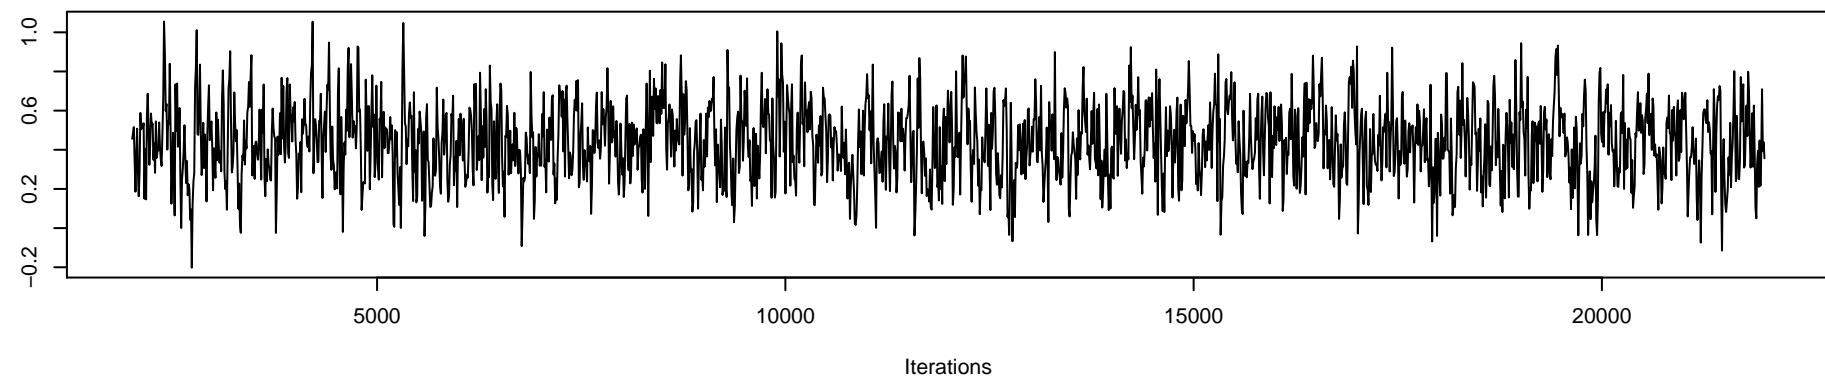

**Density of quality2-good**

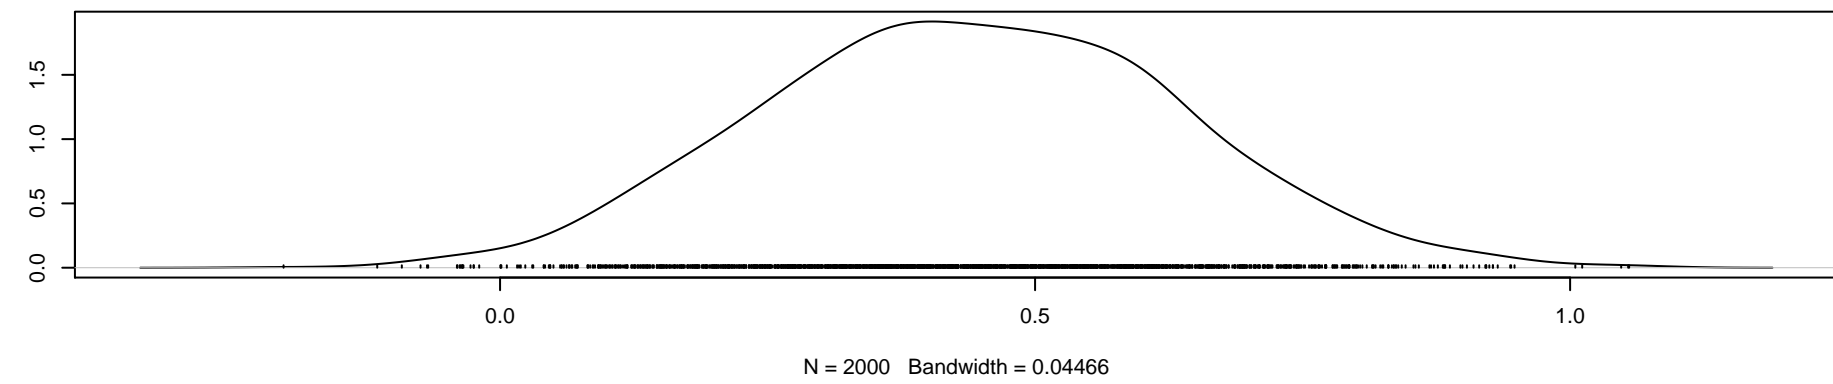

**Trace of quality3-goodfair**

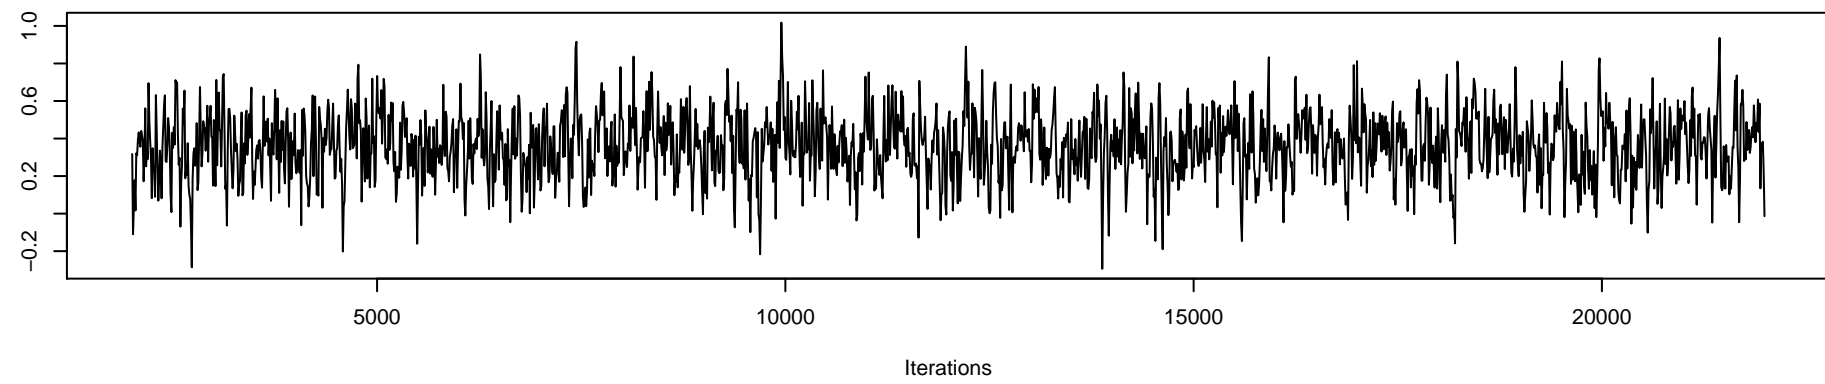

**Density of quality3-goodfair**

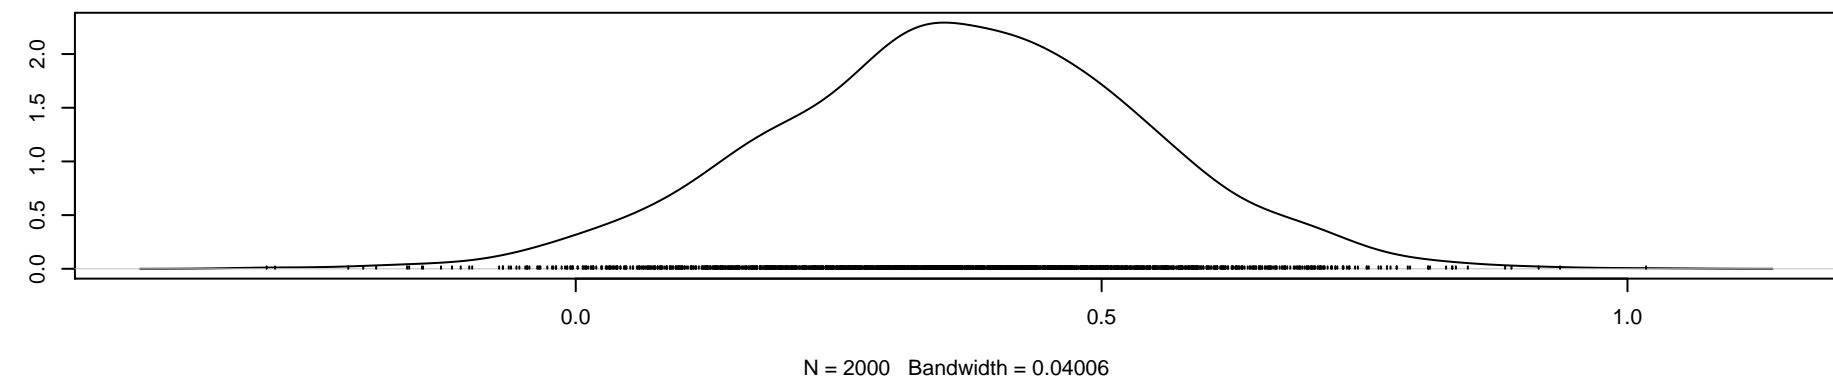

**Trace of quality4-fair**

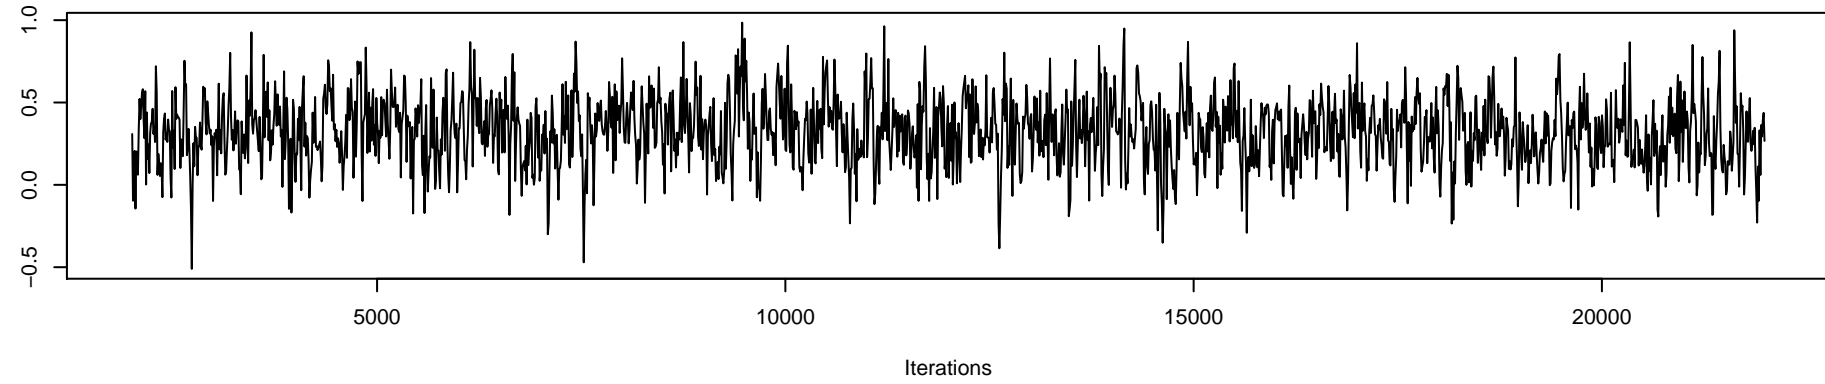

**Density of quality4-fair**

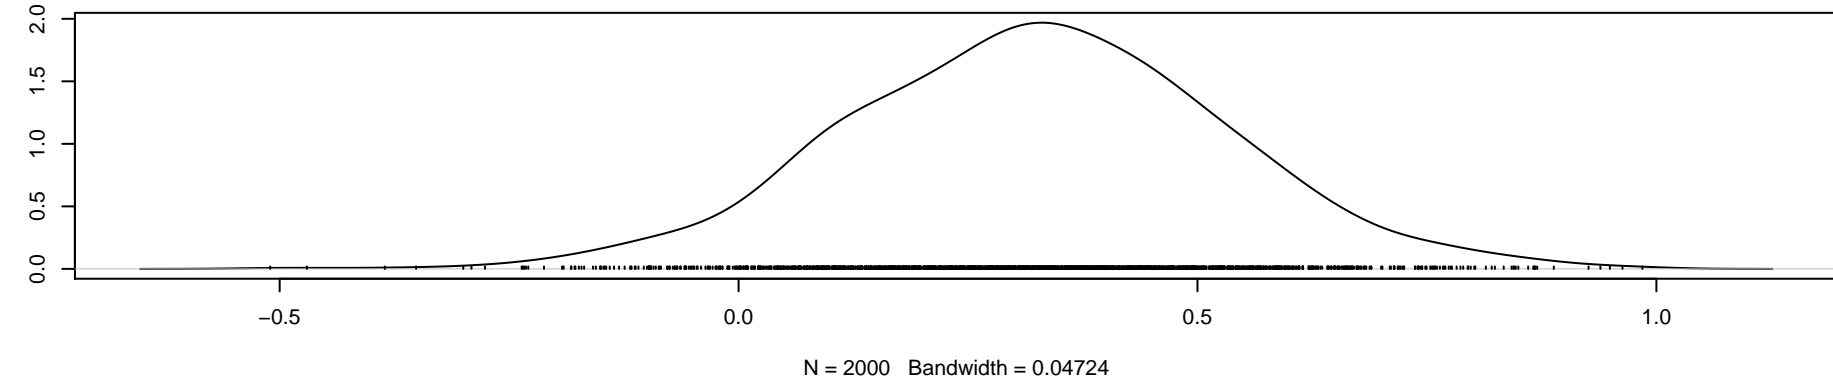

*Lasiurus cinereus*

Trace of (Intercept)

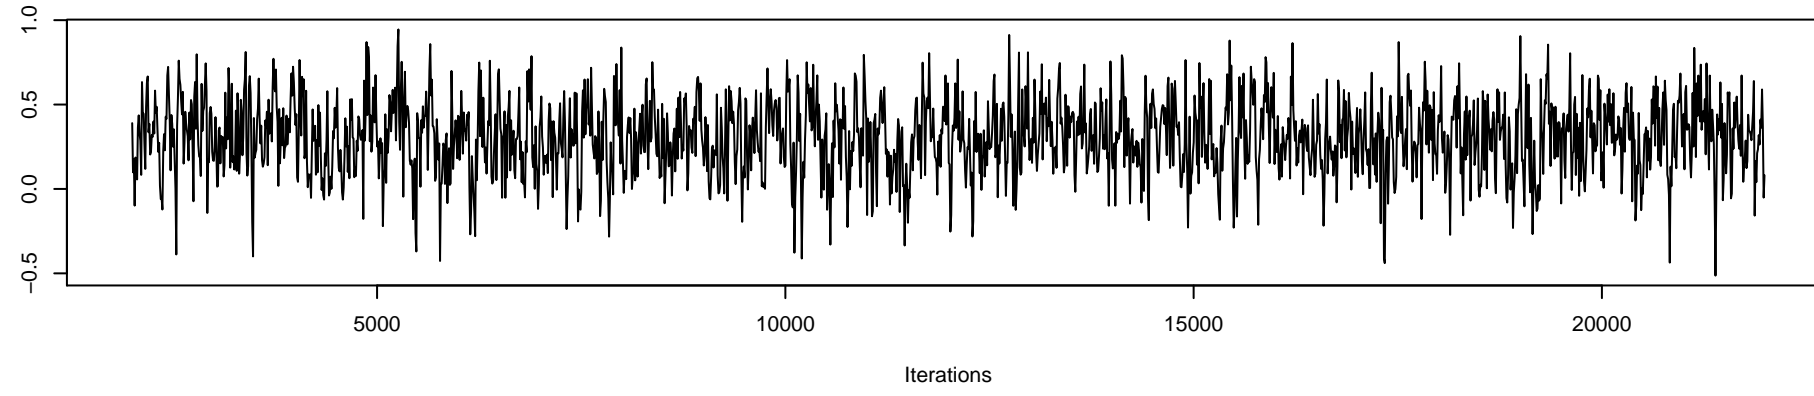

Density of (Intercept)

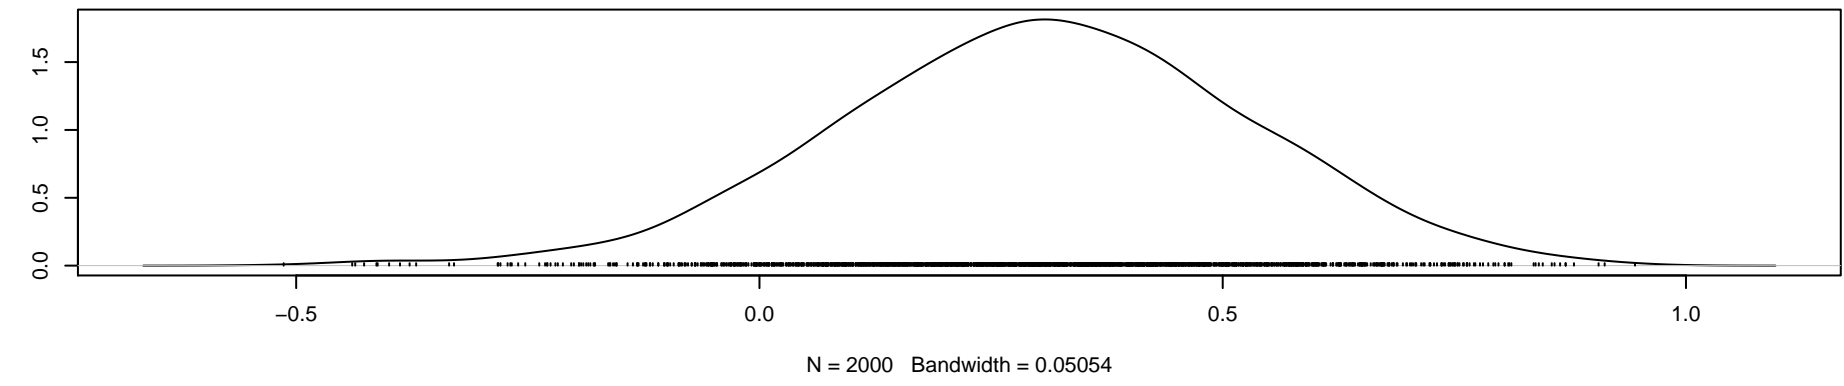

Trace of quality2-good

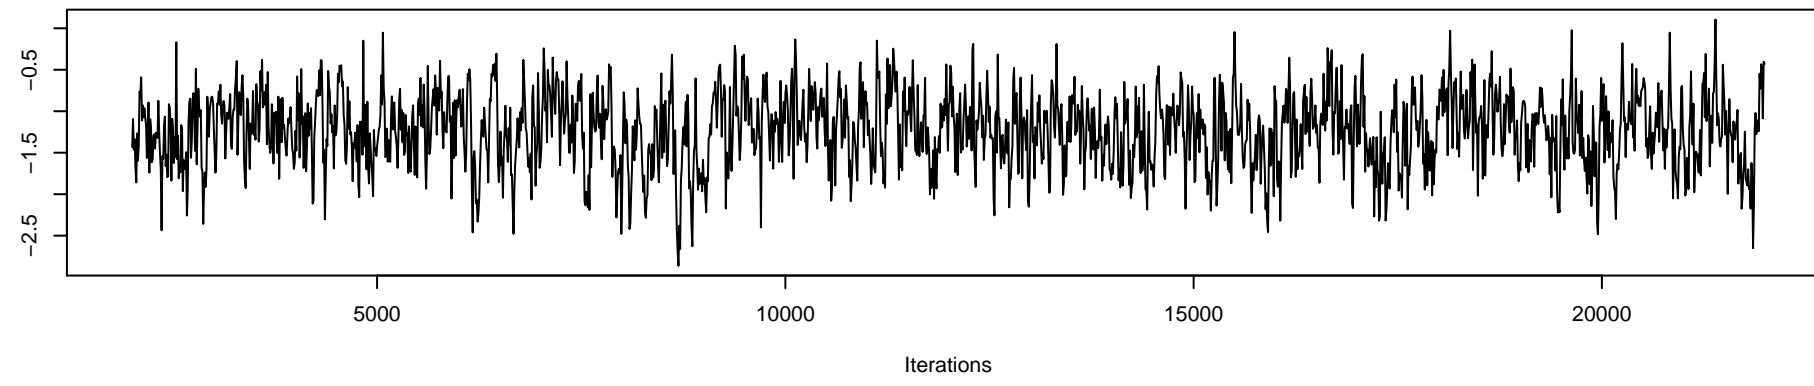

Density of quality2-good

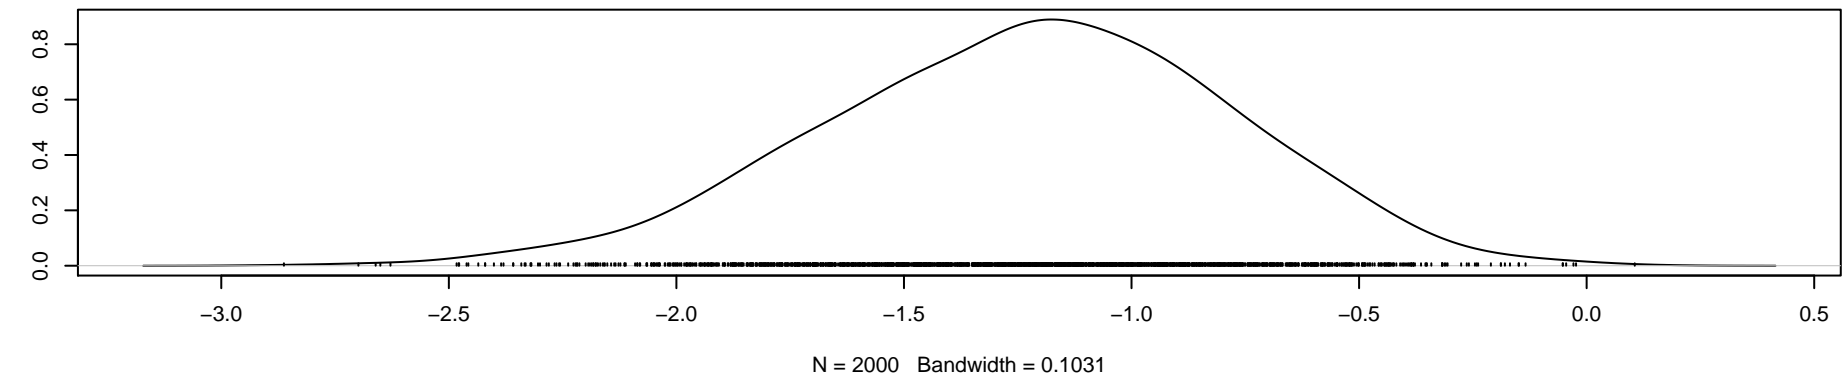

Trace of quality3-goodfair

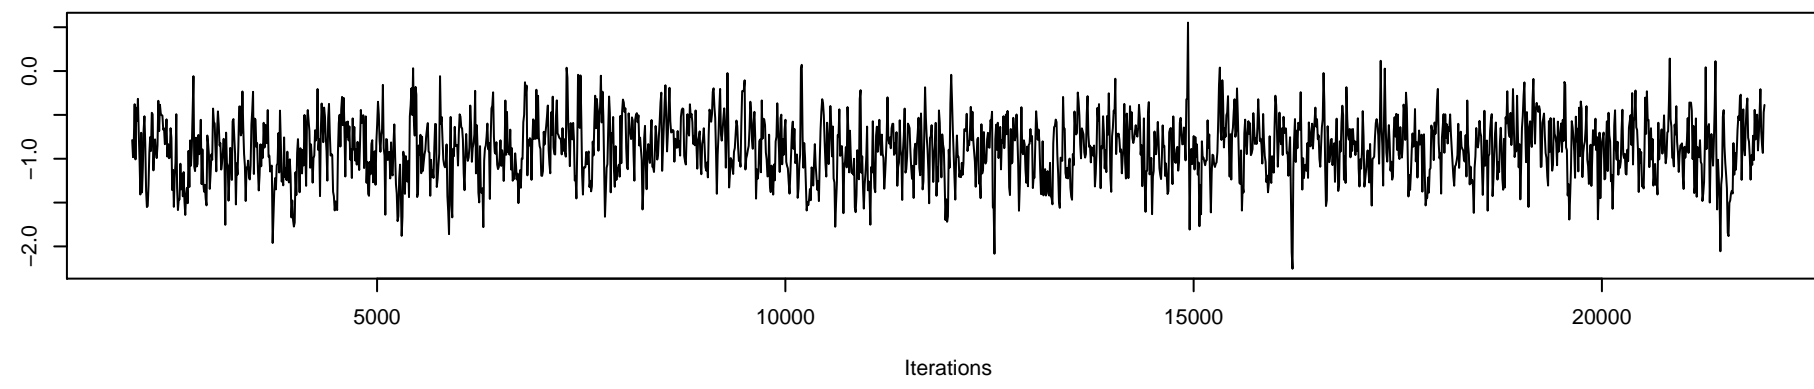

Density of quality3-goodfair

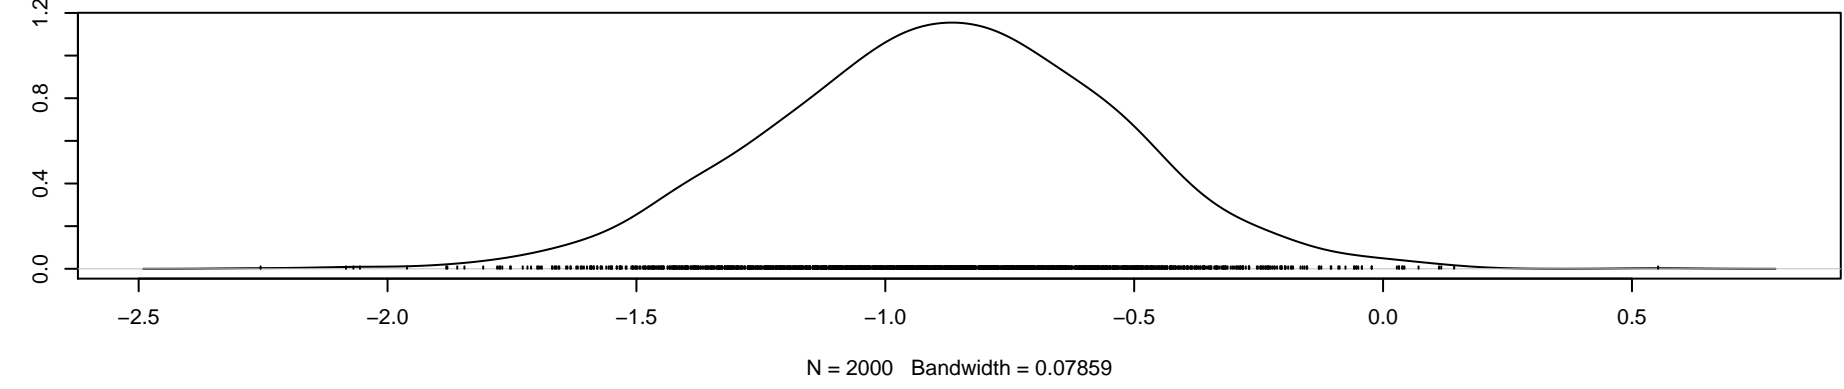

Trace of quality4-fair

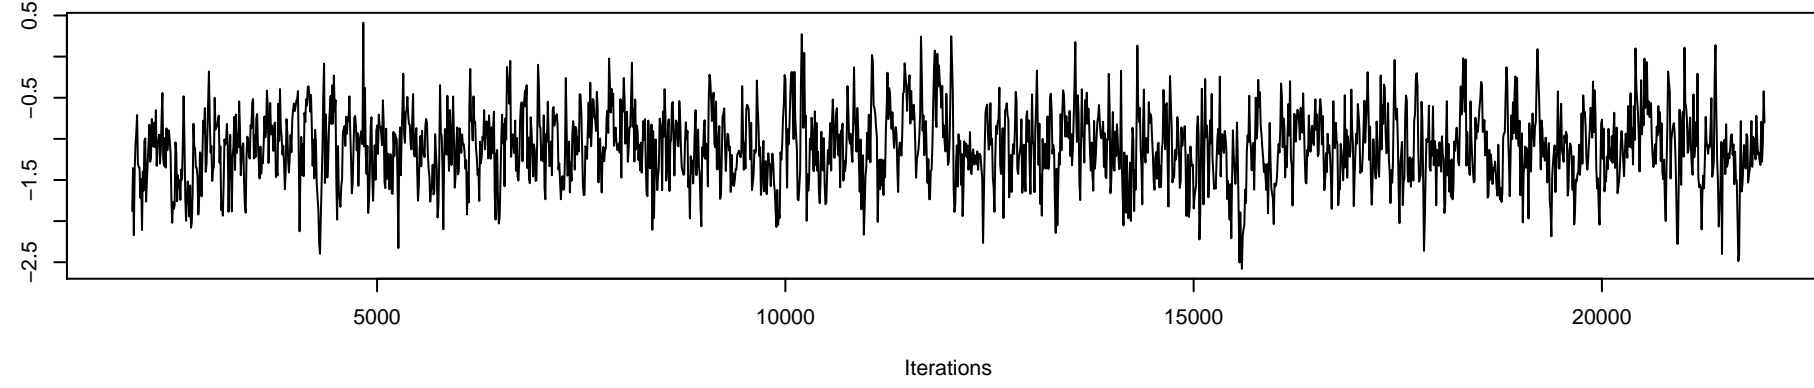

Density of quality4-fair

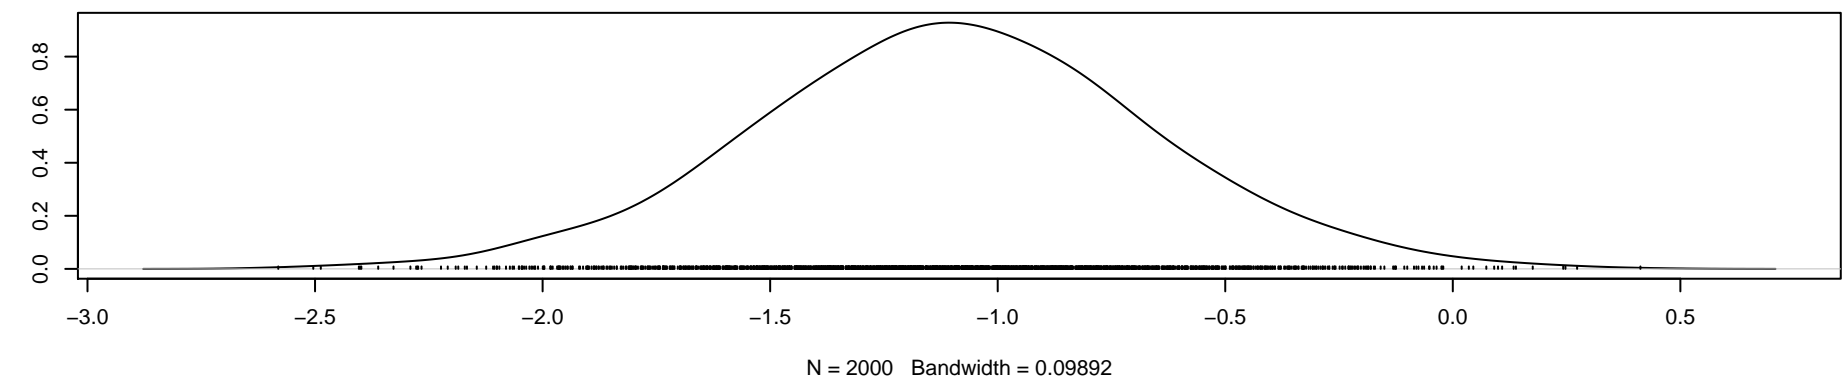

**Trace of (Intercept)**

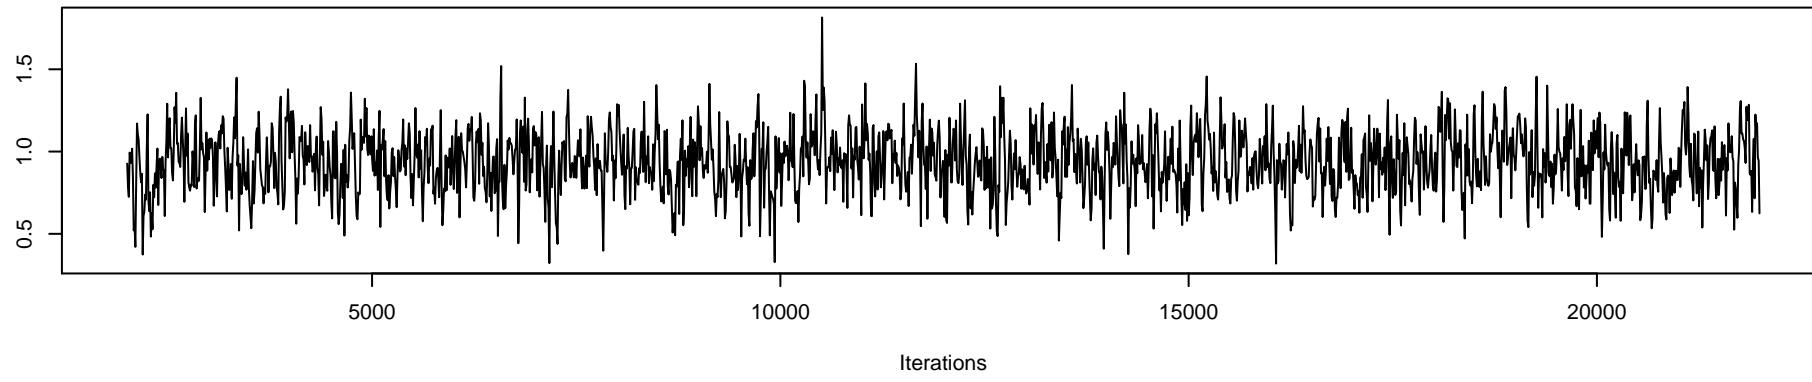

**Density of (Intercept)**

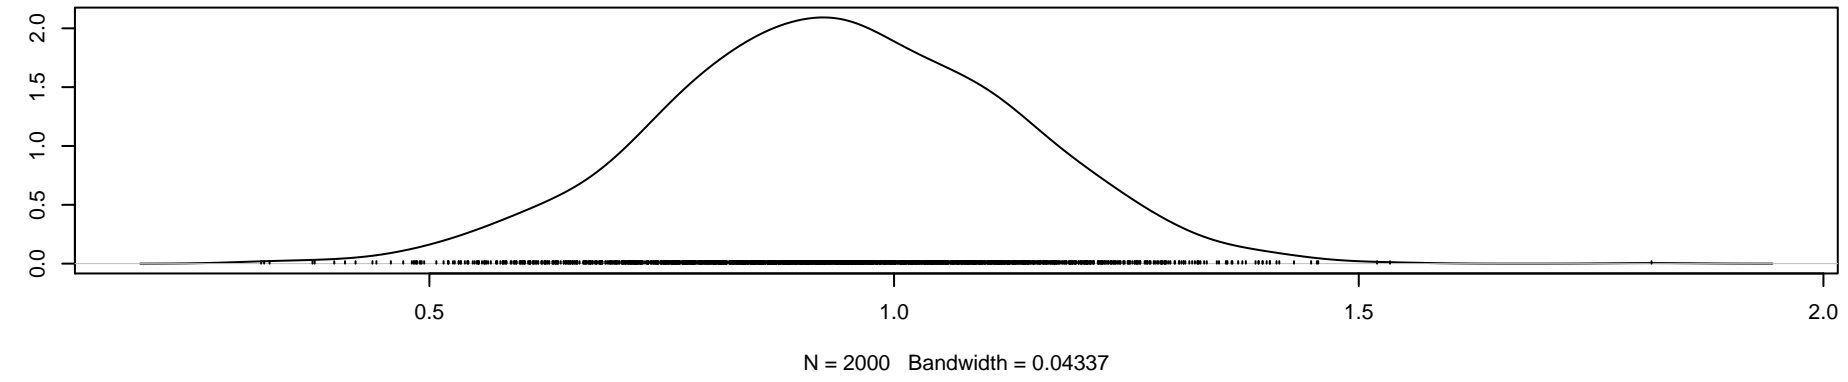

**Trace of quality2-good**

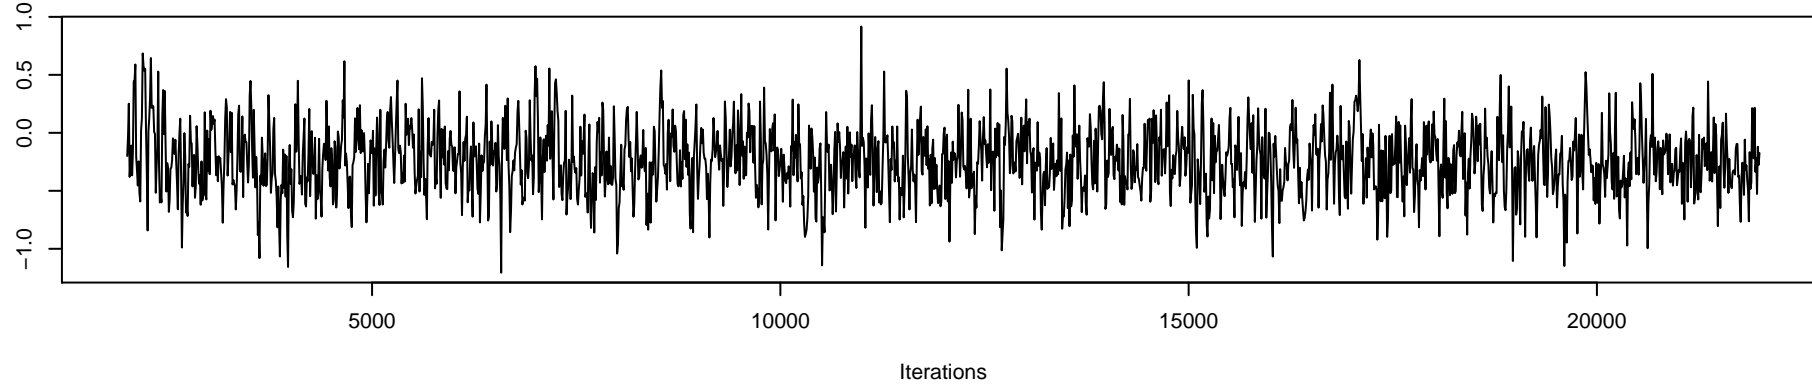

**Density of quality2-good**

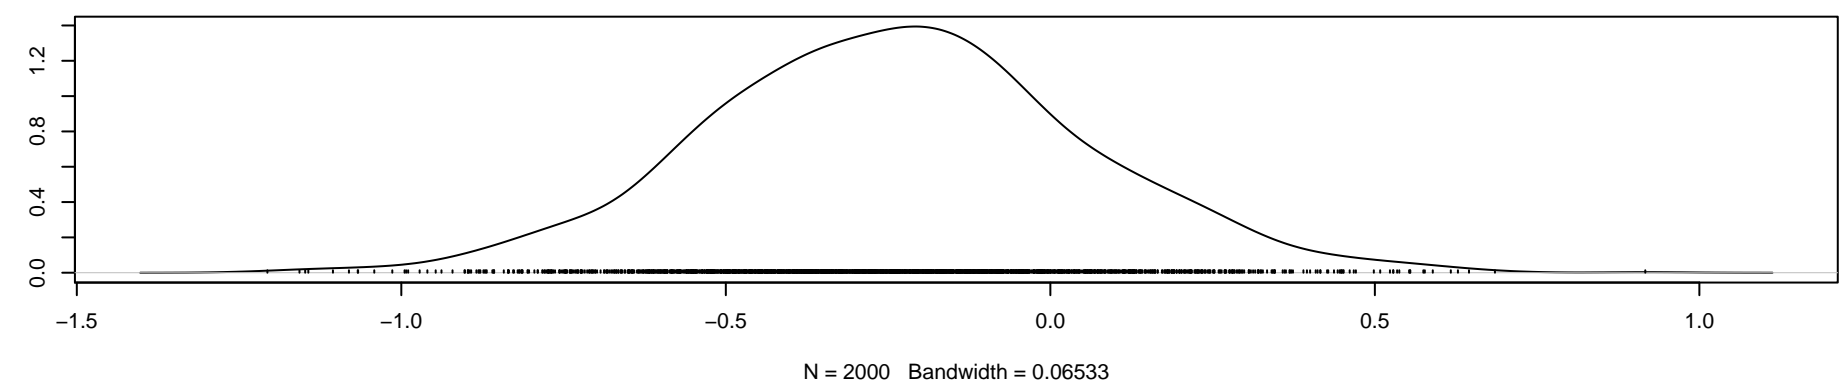

**Trace of quality3-goodfair**

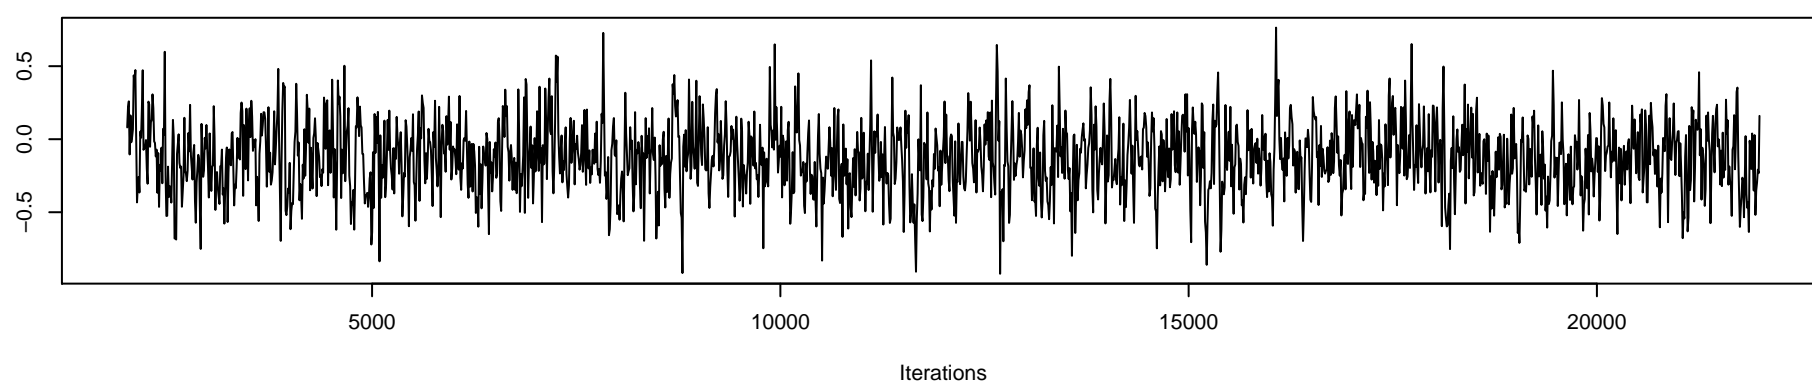

**Density of quality3-goodfair**

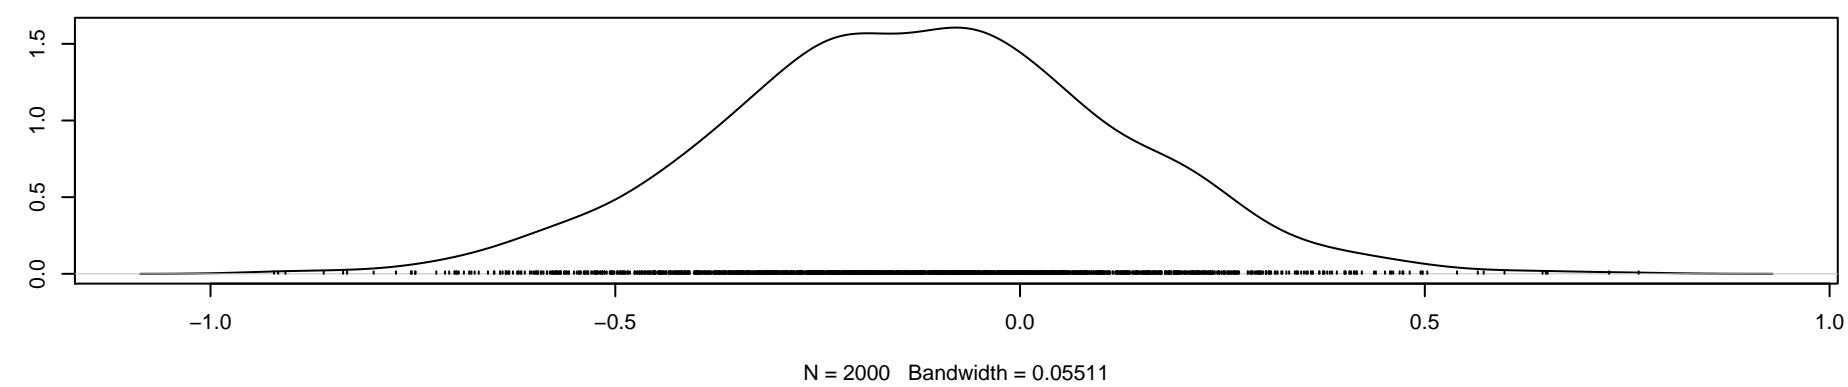

**Trace of quality4-fair**

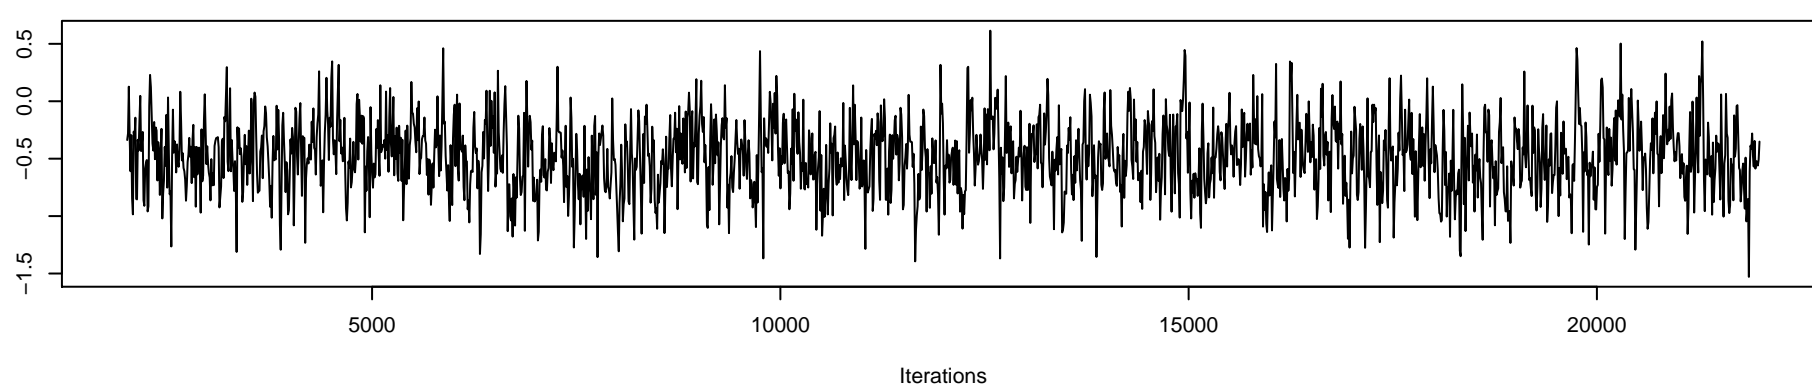

**Density of quality4-fair**

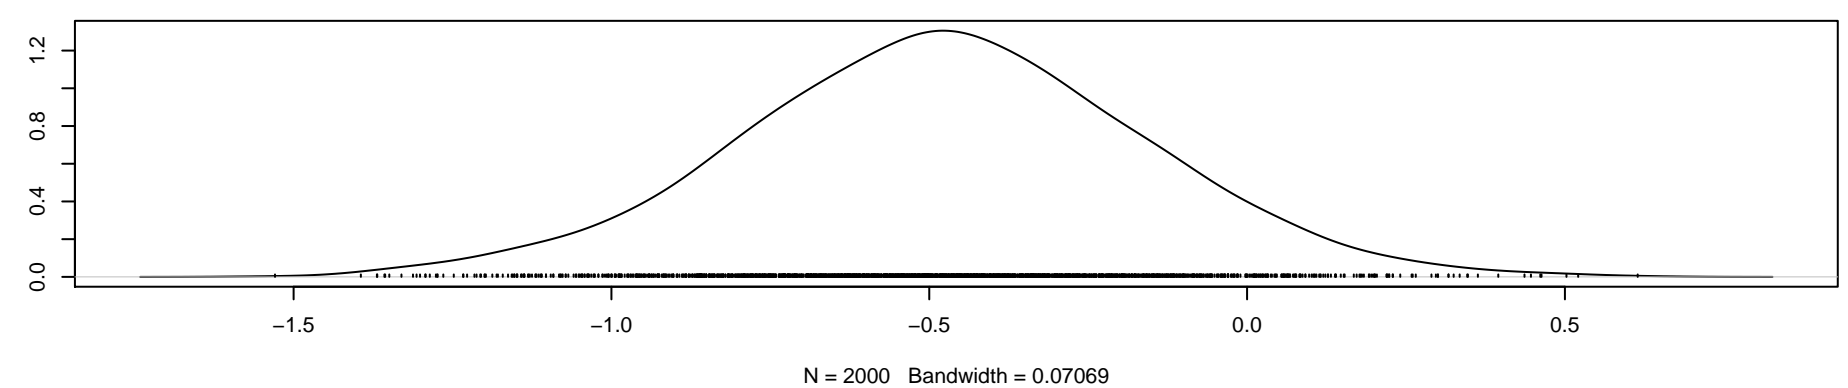

*Nycticeius humeralis*

**Trace of (Intercept)**

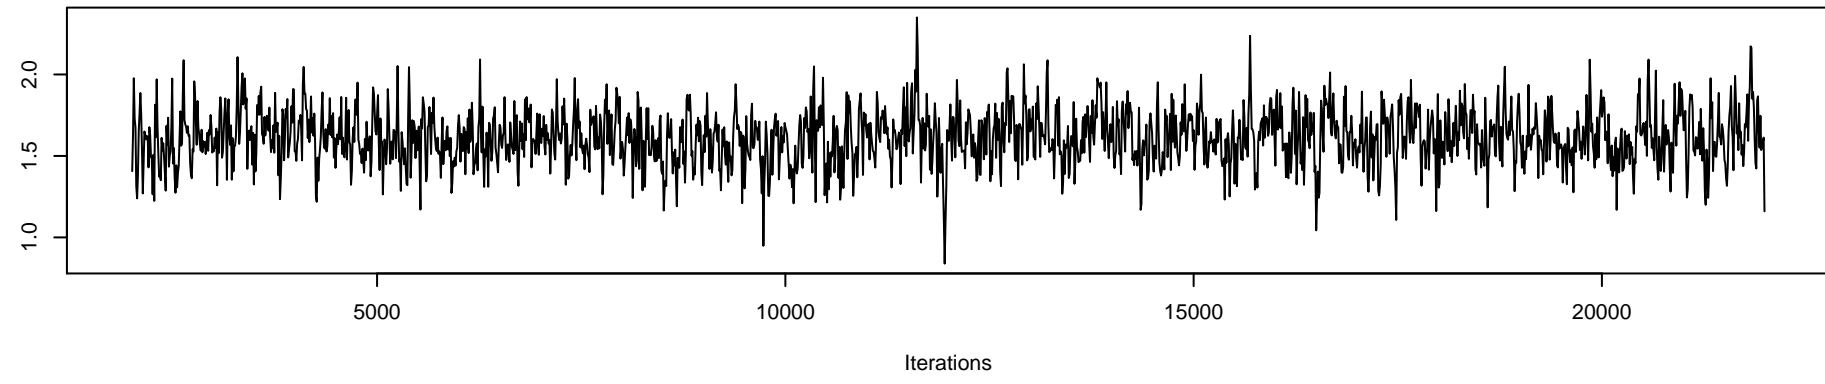

**Density of (Intercept)**

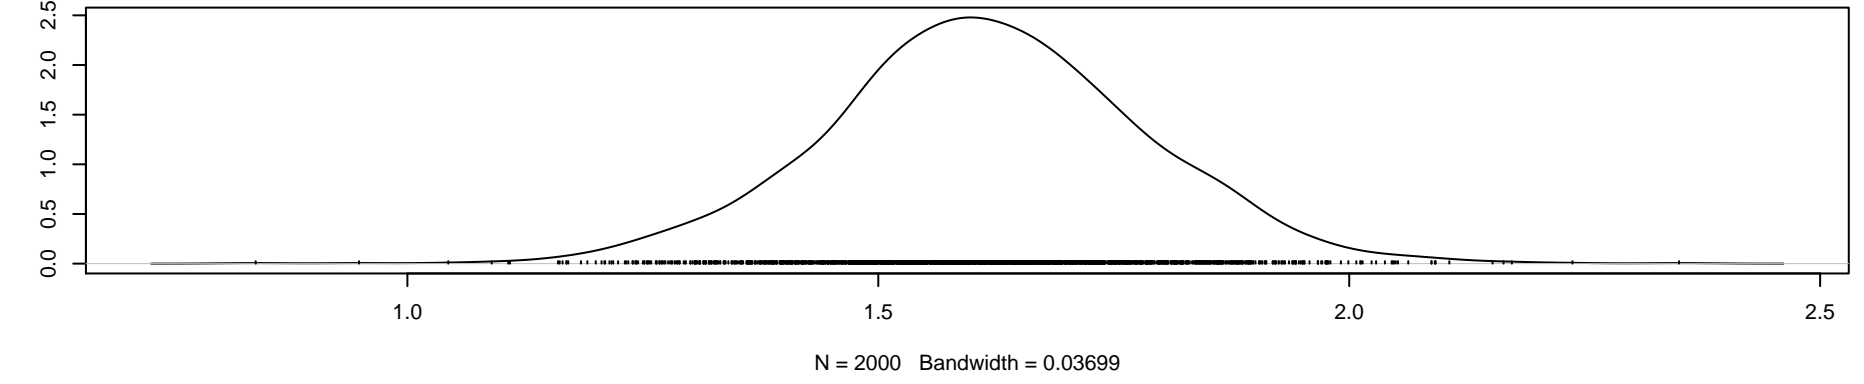

**Trace of quality2-good**

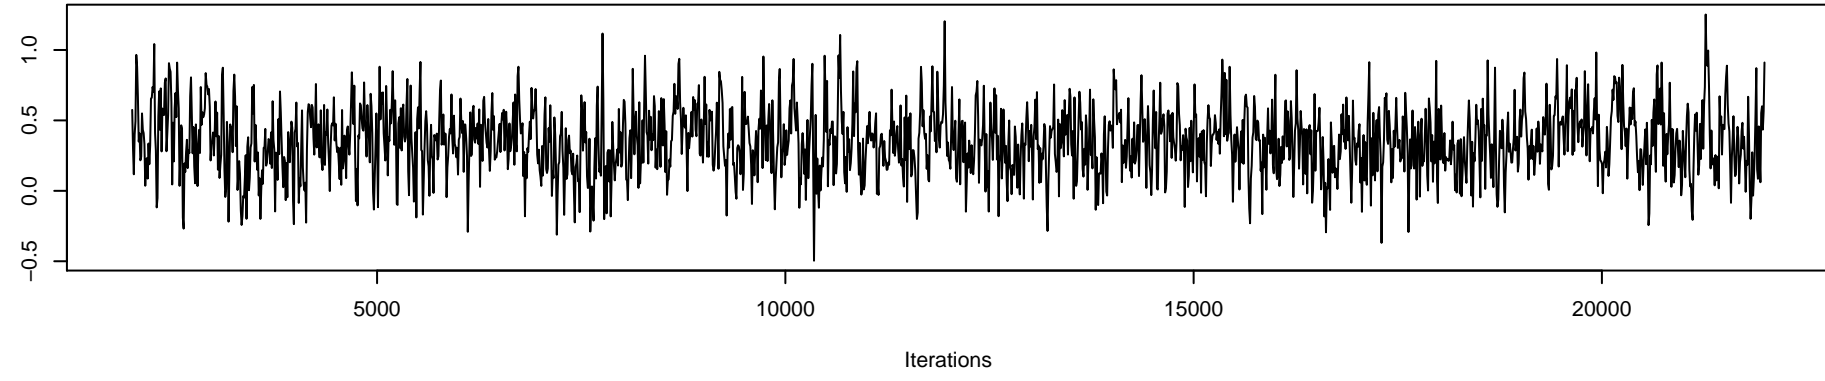

**Density of quality2-good**

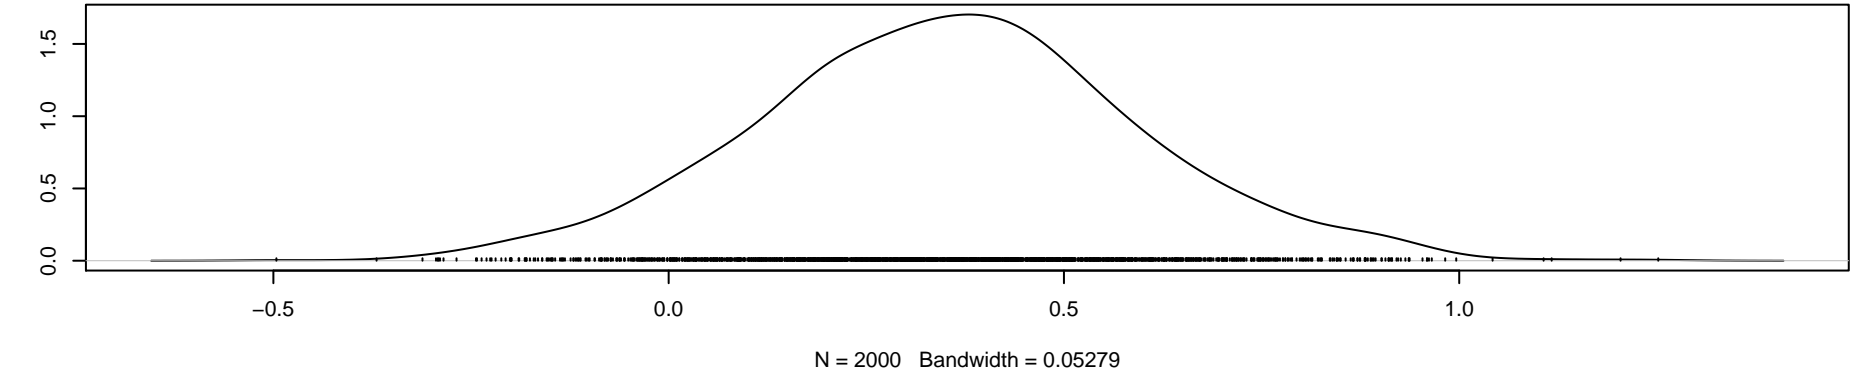

**Trace of quality3-goodfair**

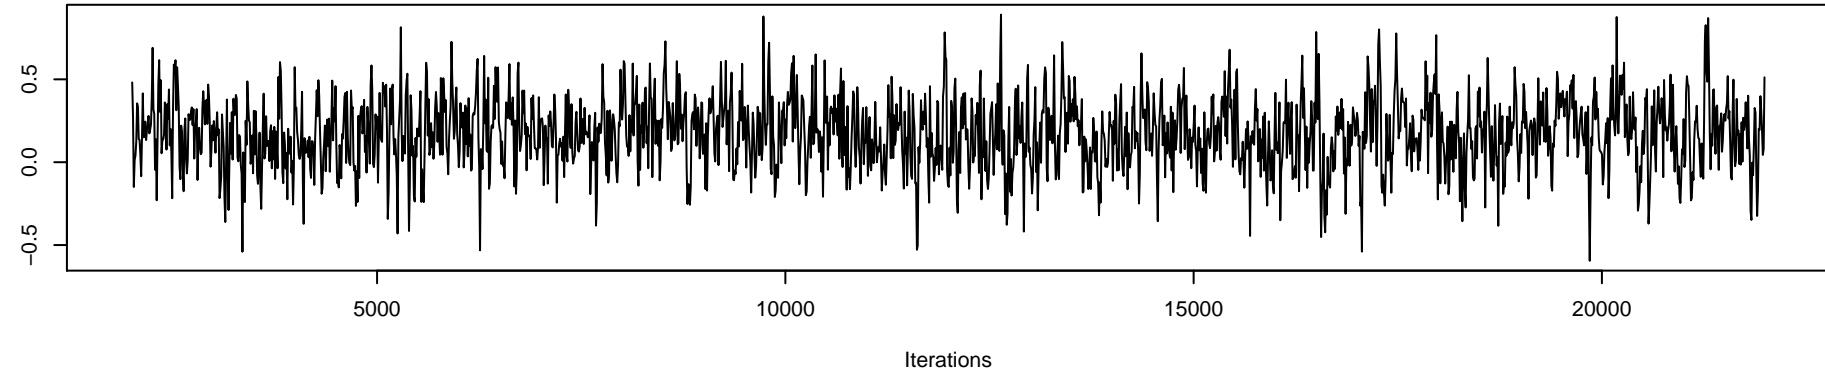

**Density of quality3-goodfair**

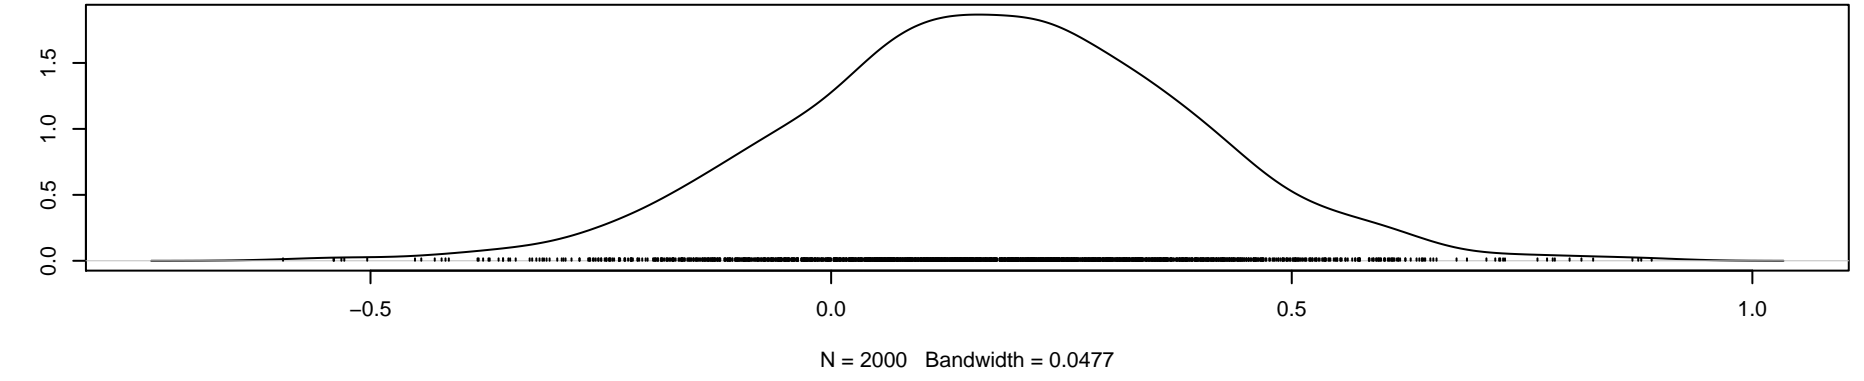

**Trace of quality4-fair**

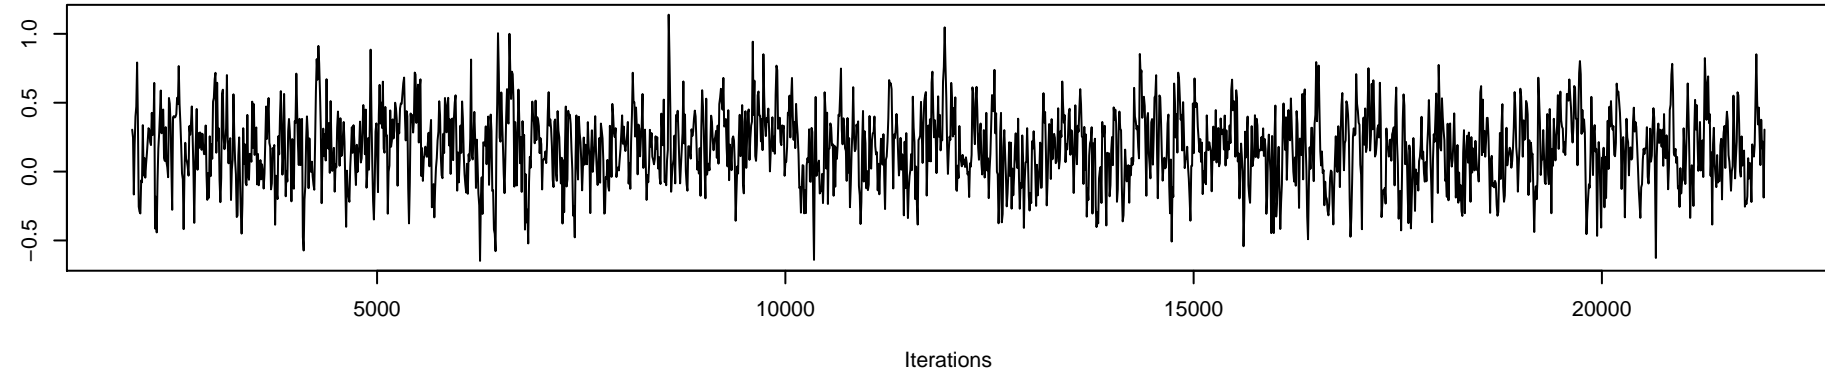

**Density of quality4-fair**

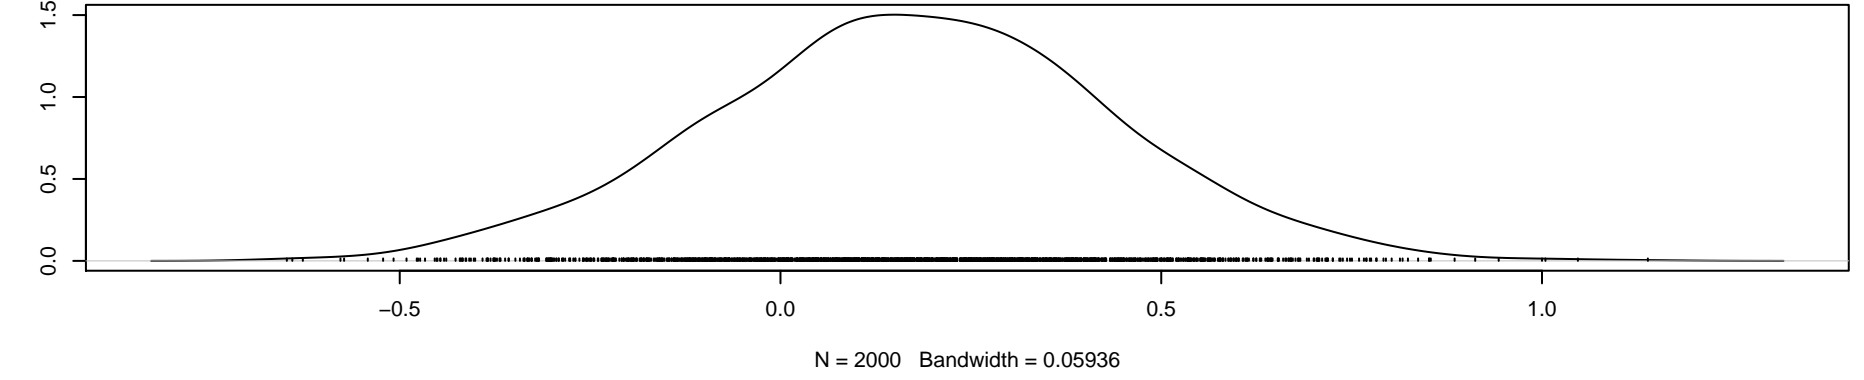

*Perimyotis subflavus*

**Trace of (Intercept)**

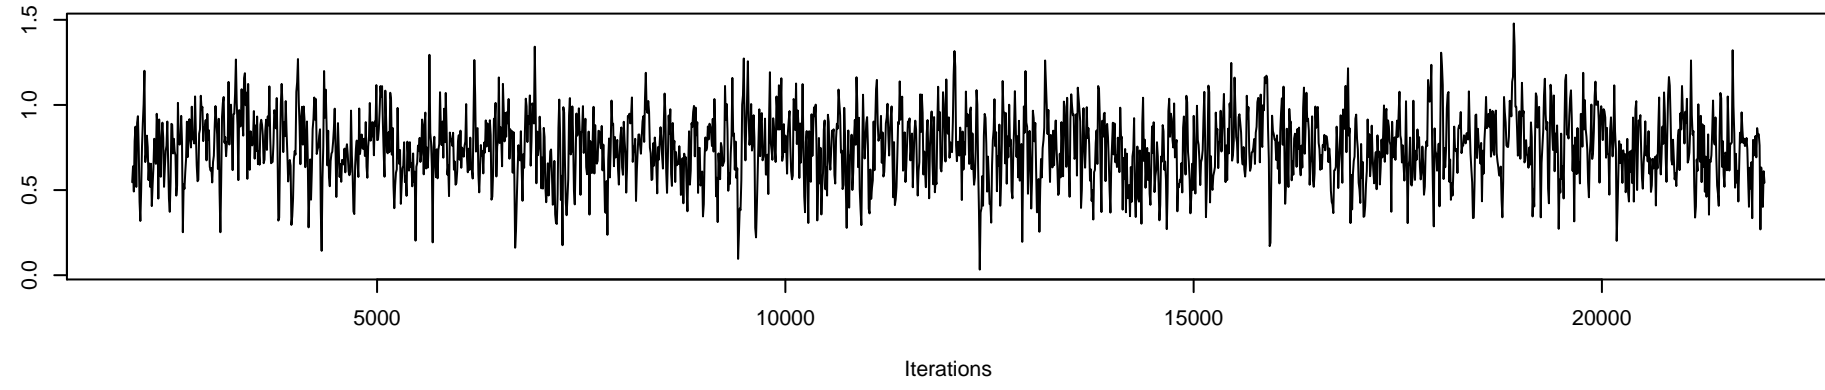

**Density of (Intercept)**

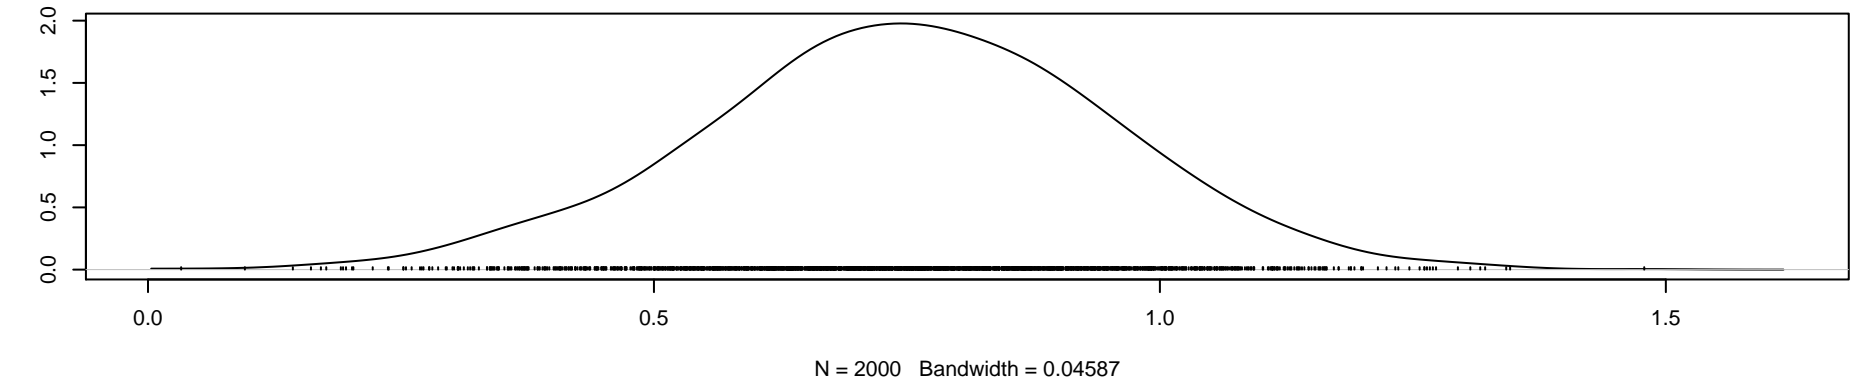

**Trace of quality2-good**

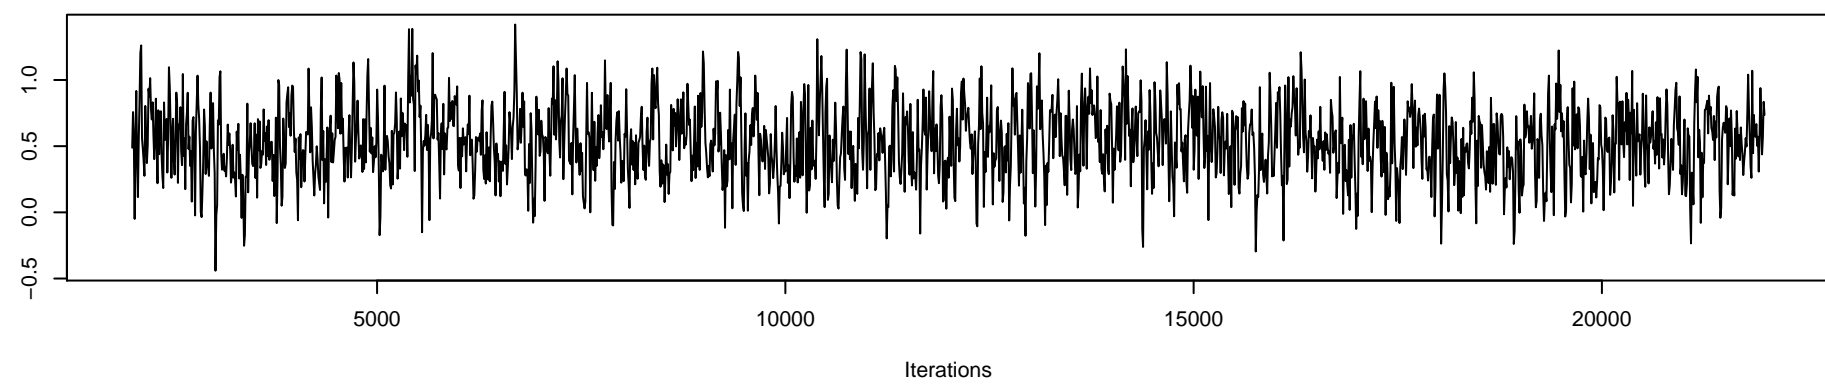

**Density of quality2-good**

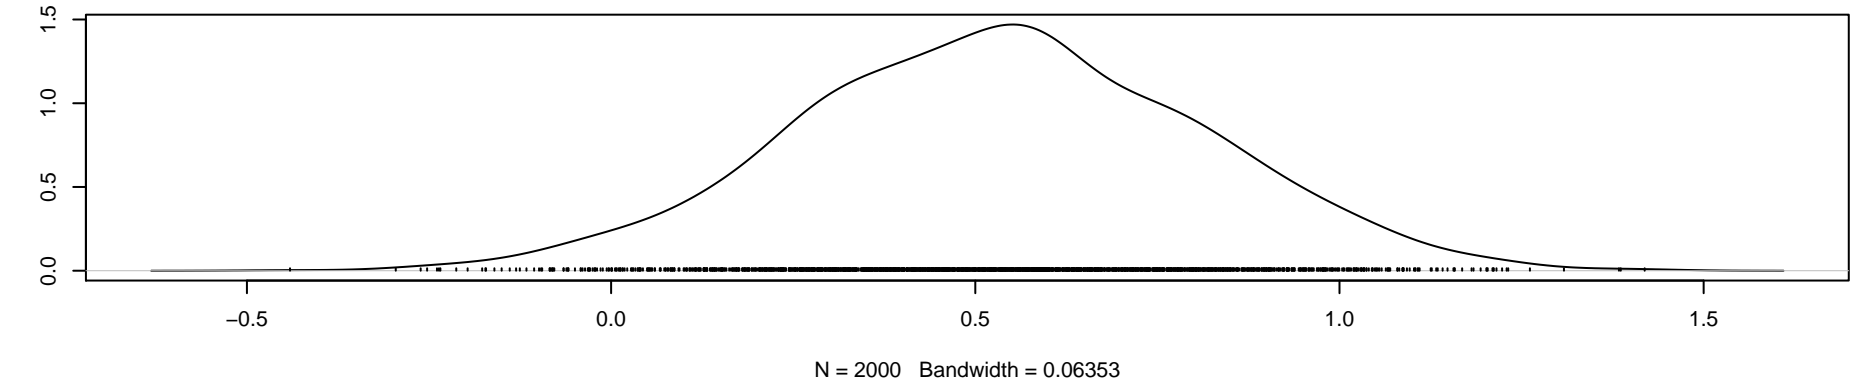

**Trace of quality3-goodfair**

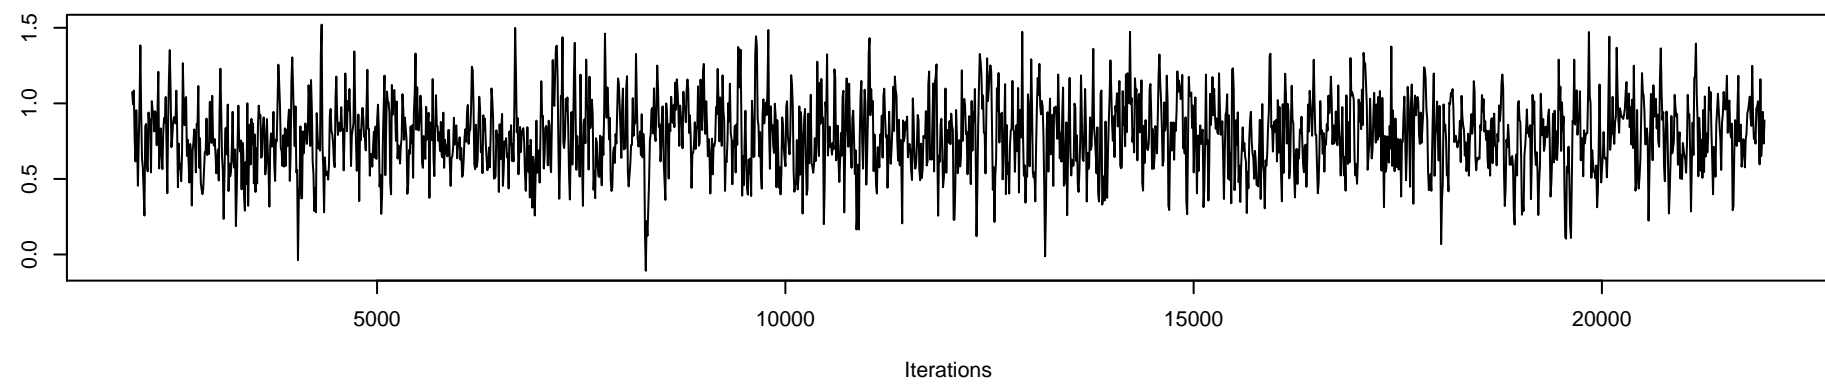

**Density of quality3-goodfair**

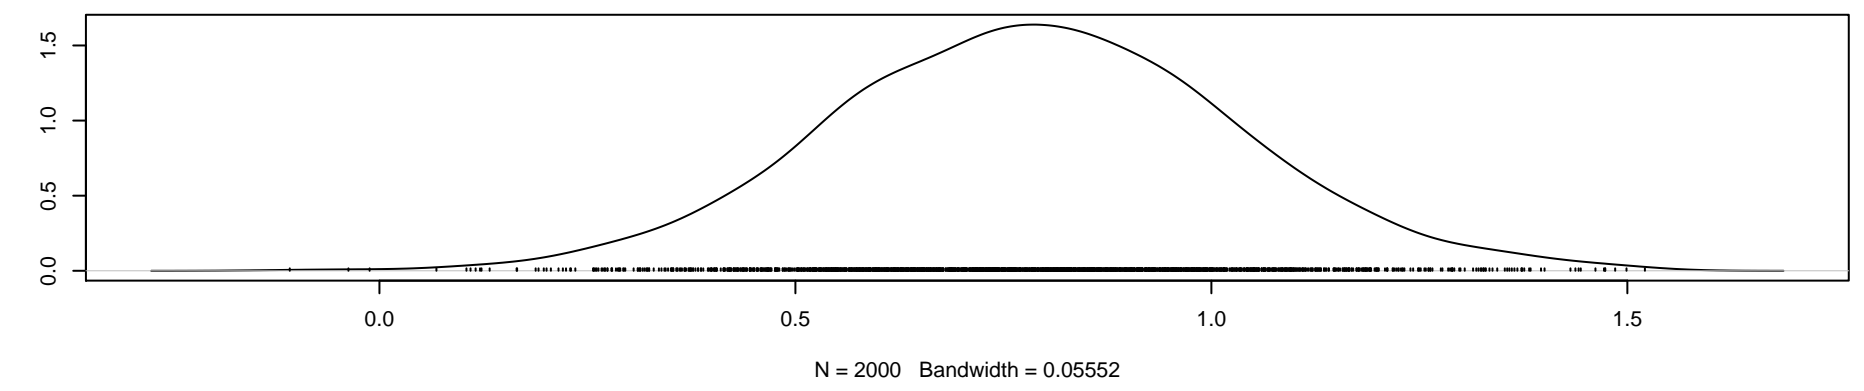

**Trace of quality4-fair**

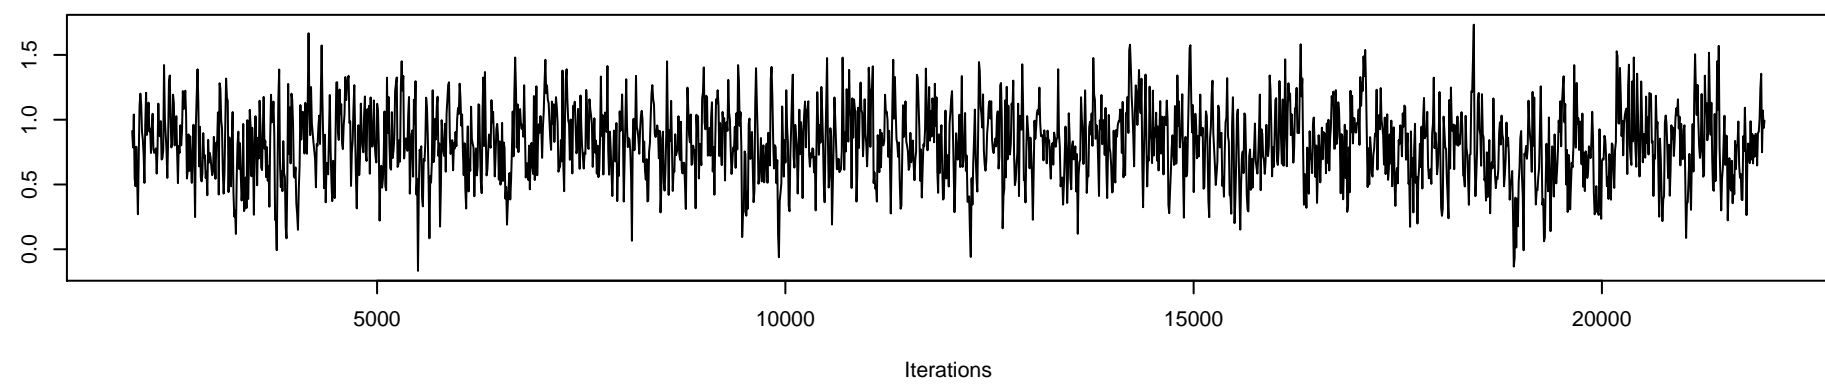

**Density of quality4-fair**

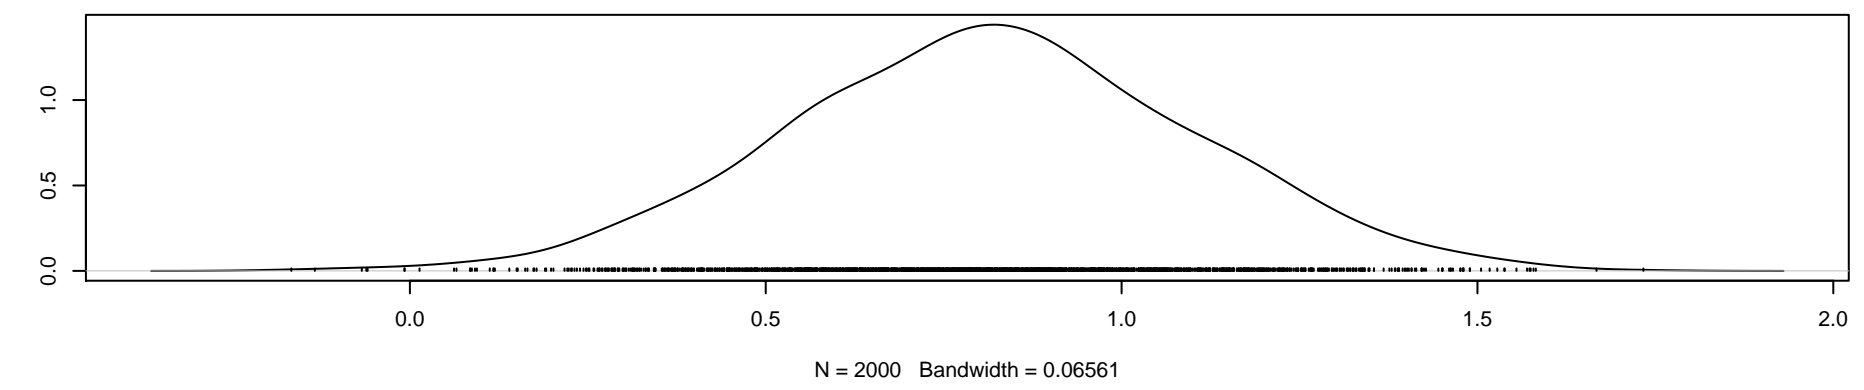

*Tadarida brasiliensis*

**Trace of (Intercept)**

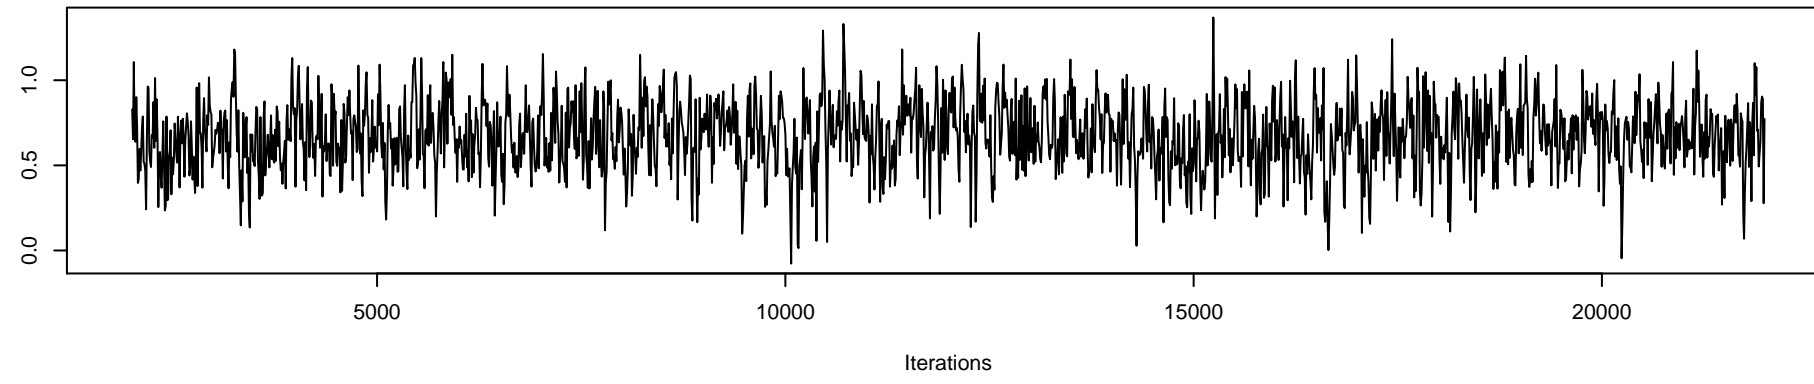

**Density of (Intercept)**

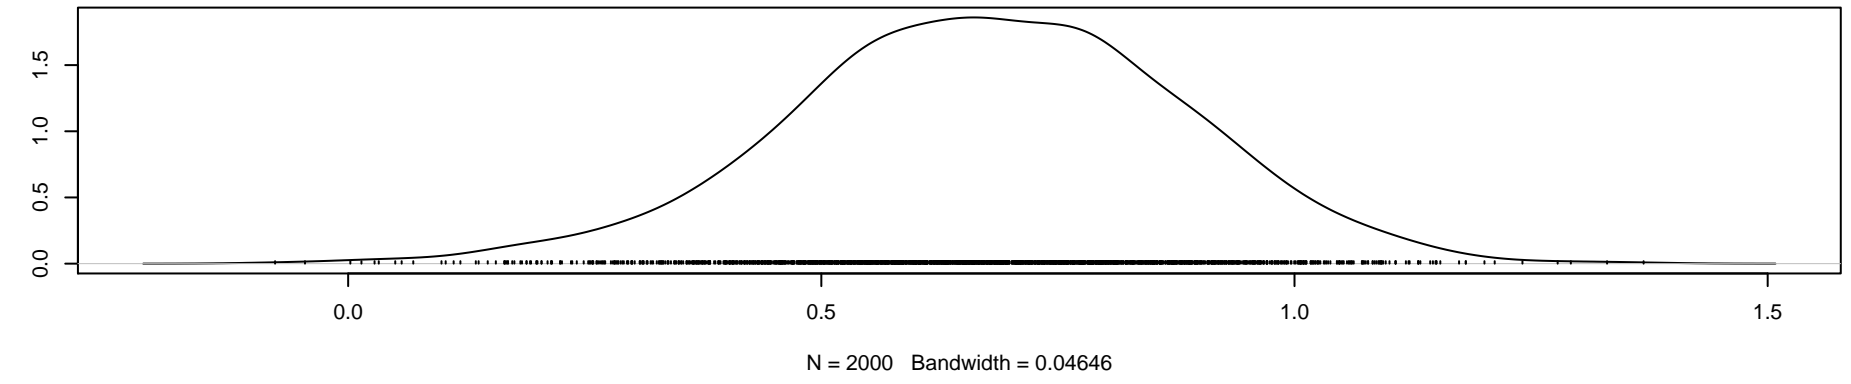

**Trace of quality2-good**

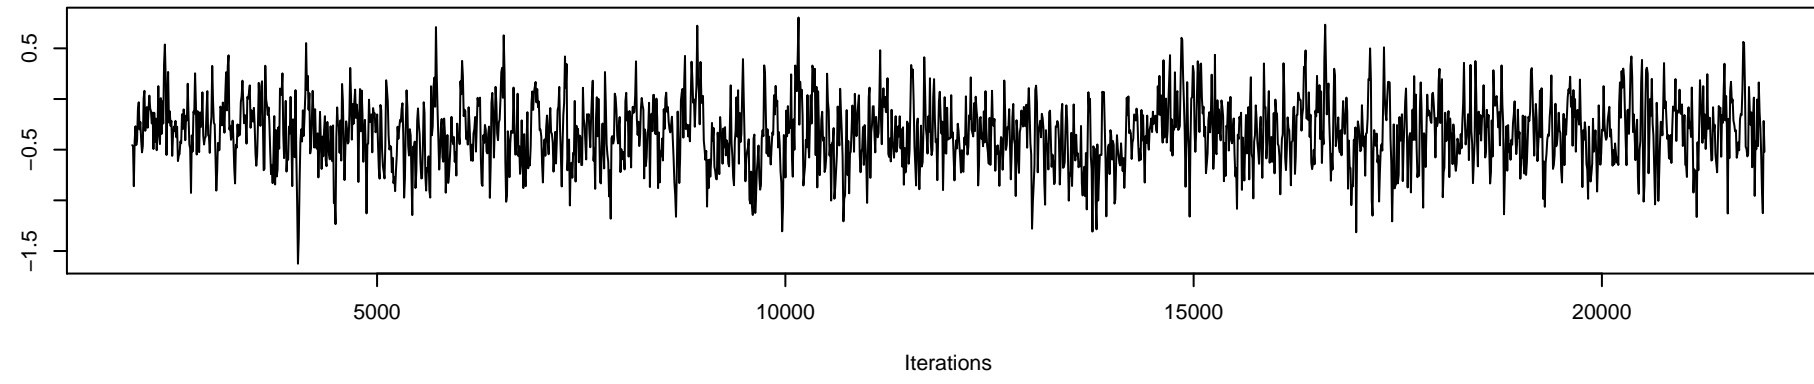

**Density of quality2-good**

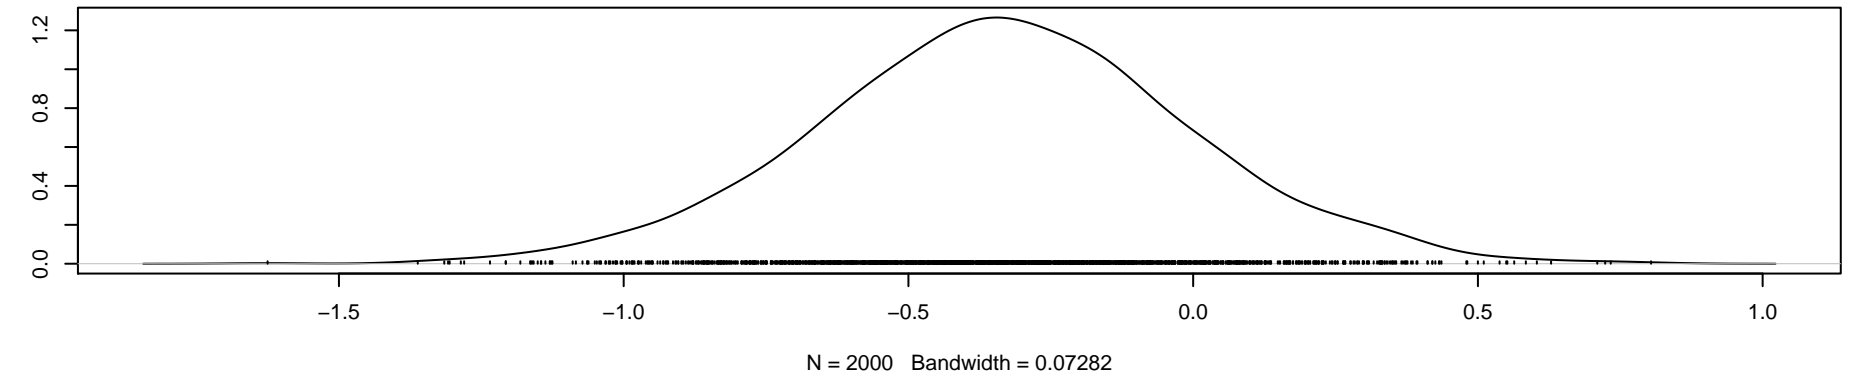

**Trace of quality3-goodfair**

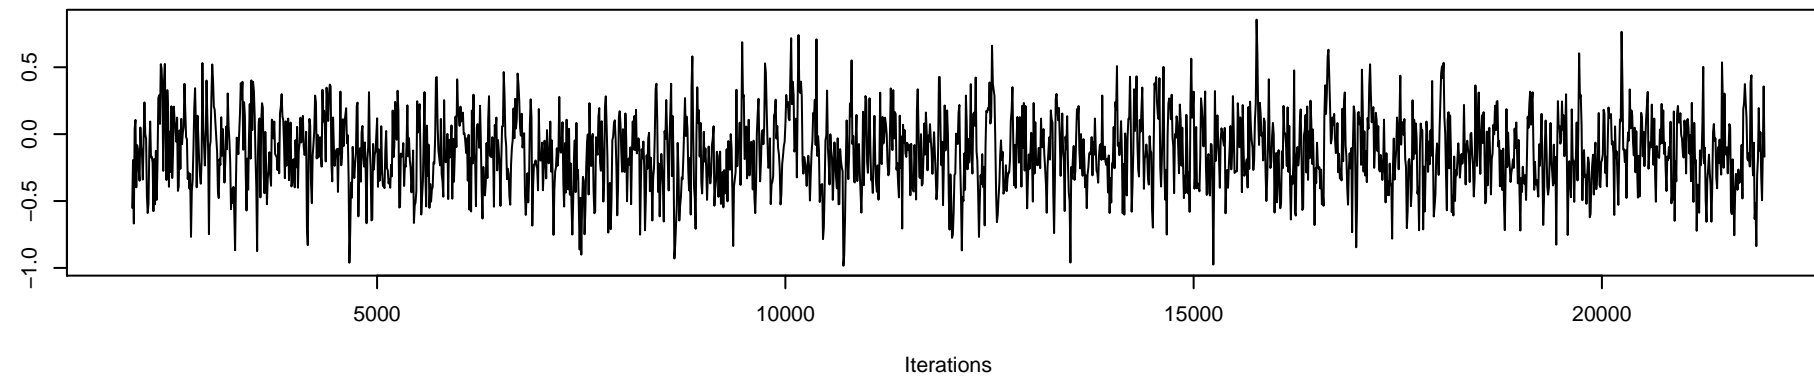

**Density of quality3-goodfair**

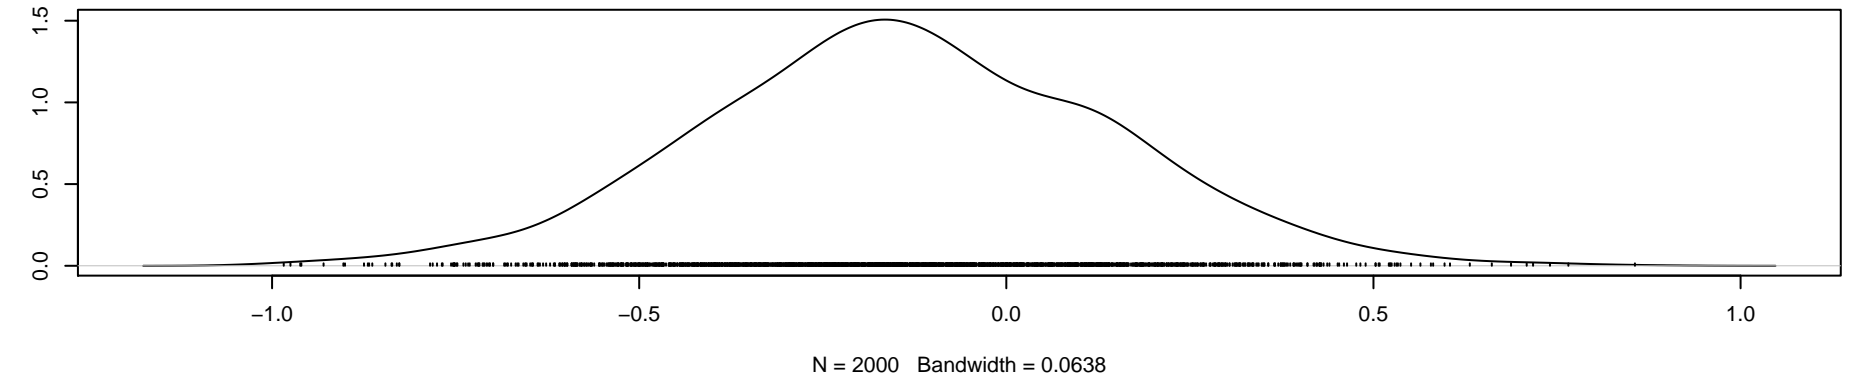

**Trace of quality4-fair**

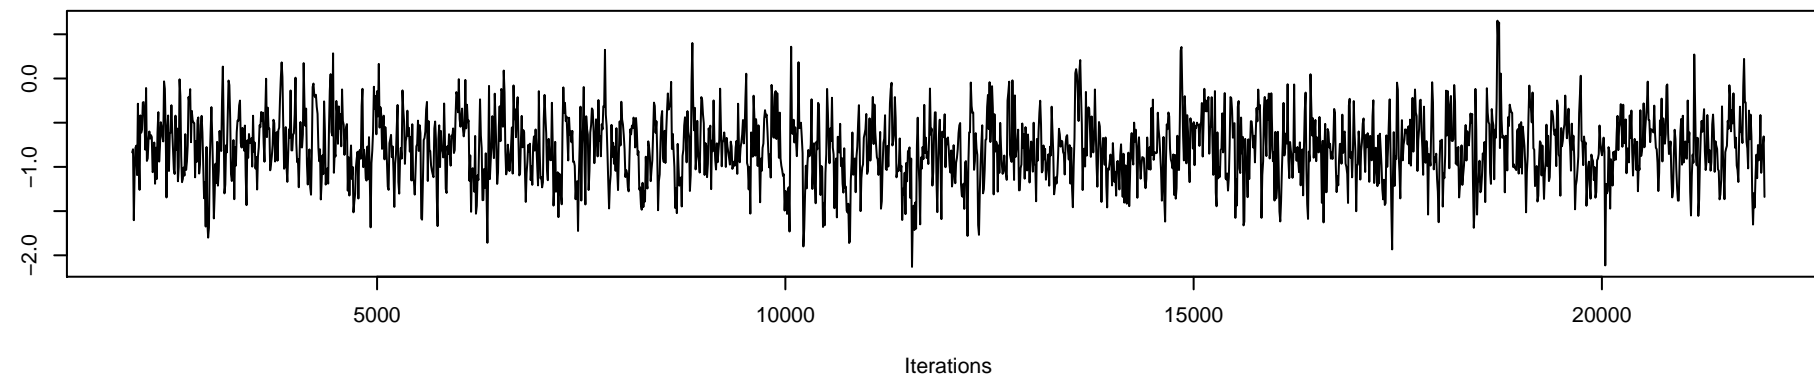

**Density of quality4-fair**

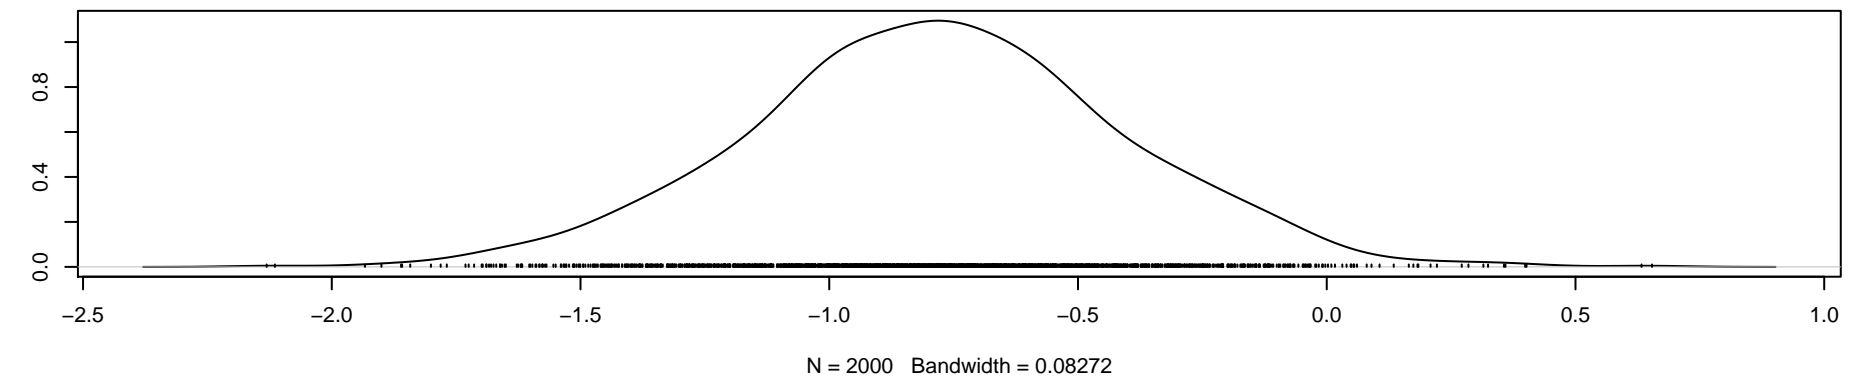

Supplement: ECE3-8-667-s001.pdf [file ECE3-8-667-s001.pdf]
