# Supplementary material for: Separating the effects of water quality and urbanization on temperate insectivorous bats at the landscape scale
Source: PubMed Central journal article supplement (PMC5756845; doi:10.1002/ece3.3693), 2017-12-03

**Trace of (Intercept)**

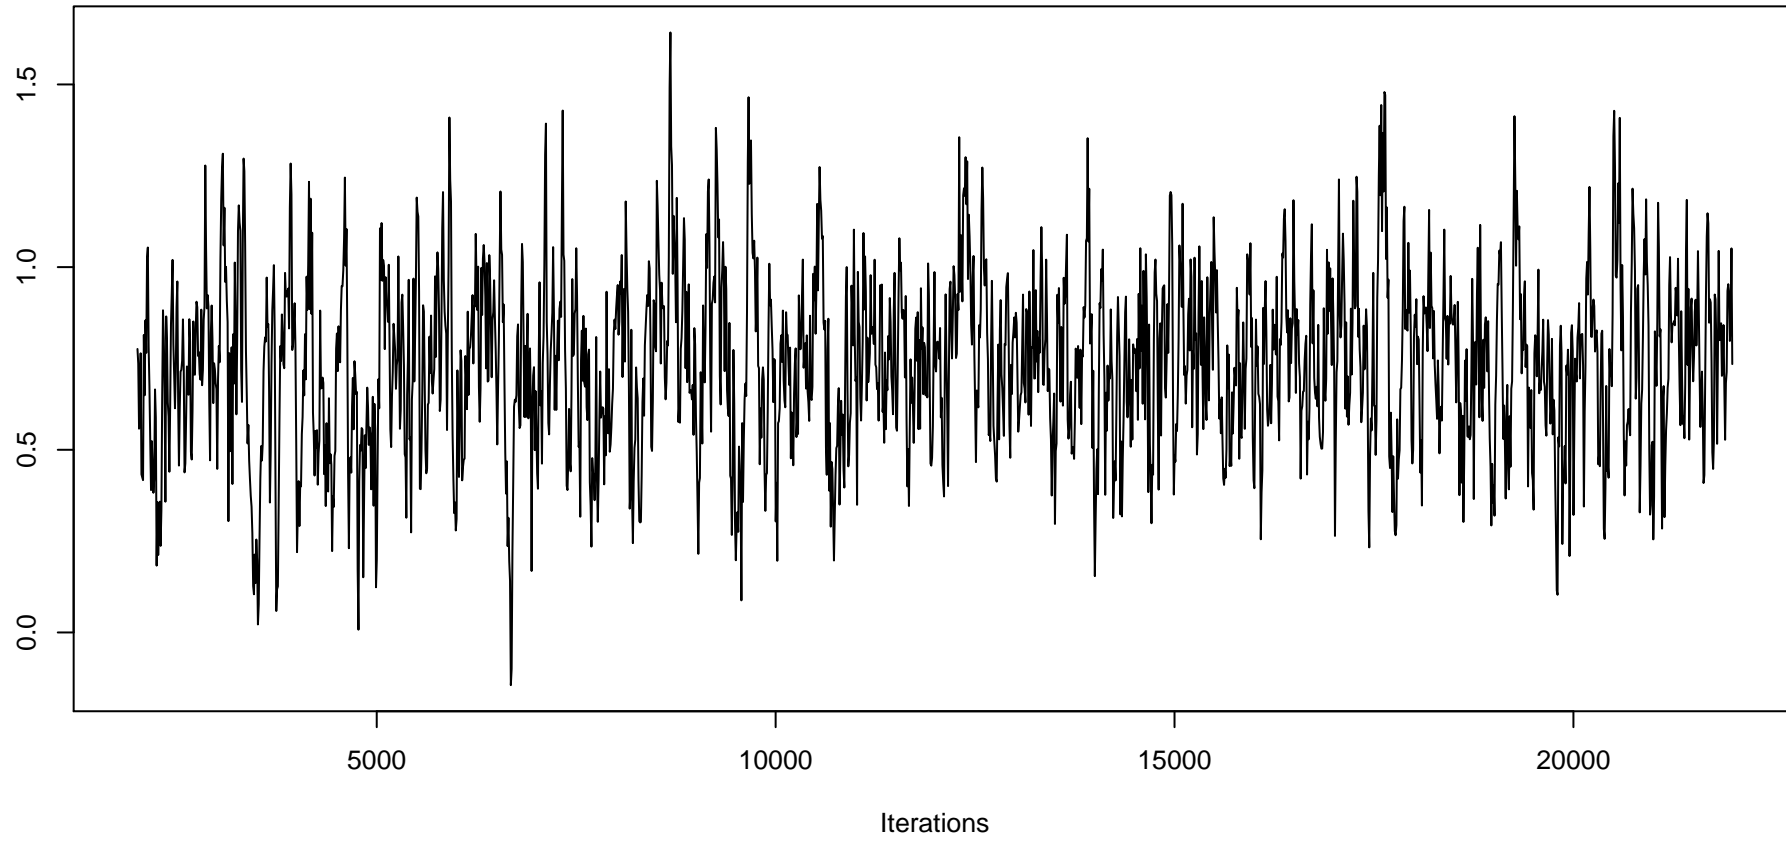

*Eptesicus fuscus*

**Density of (Intercept)**

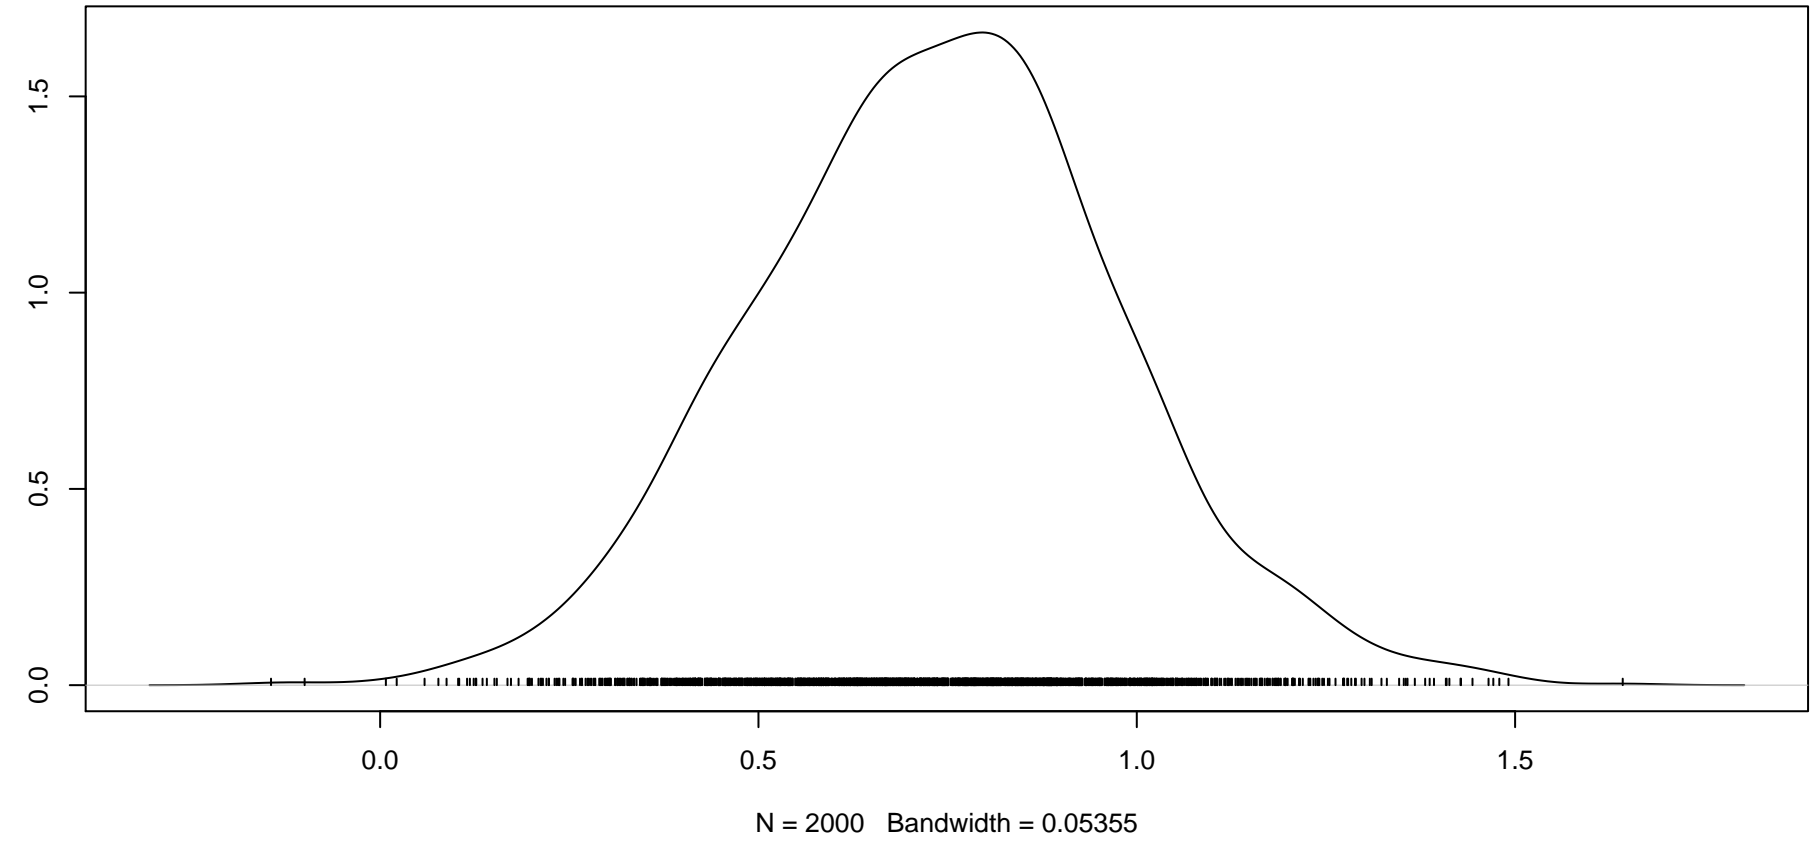

**Trace of urban**

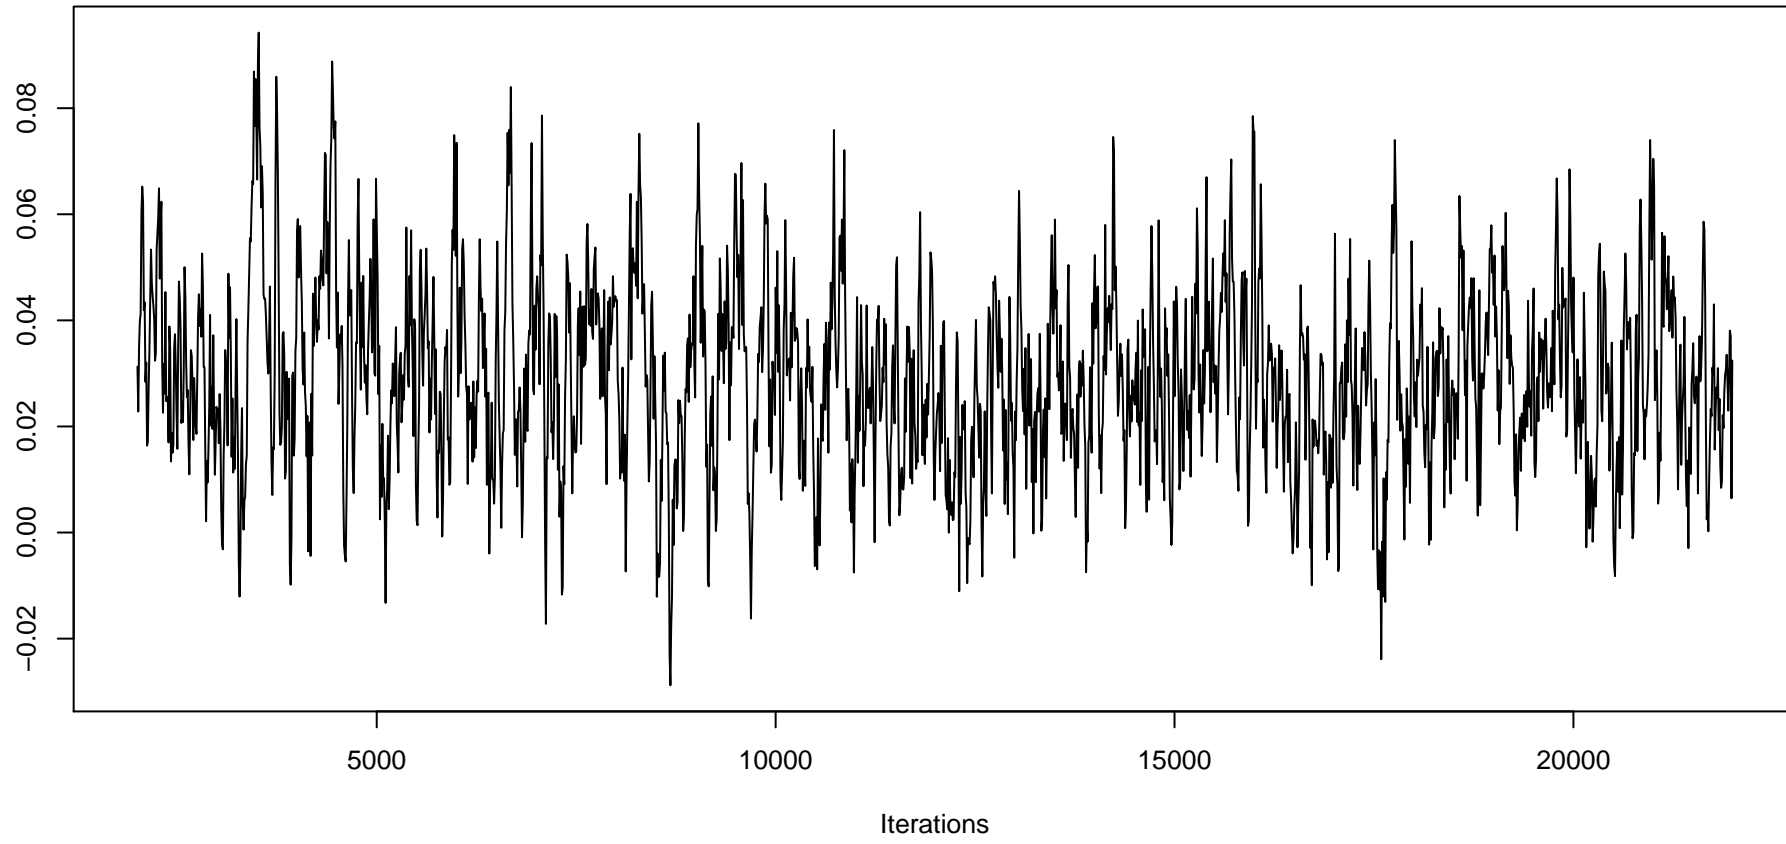

**Density of urban**

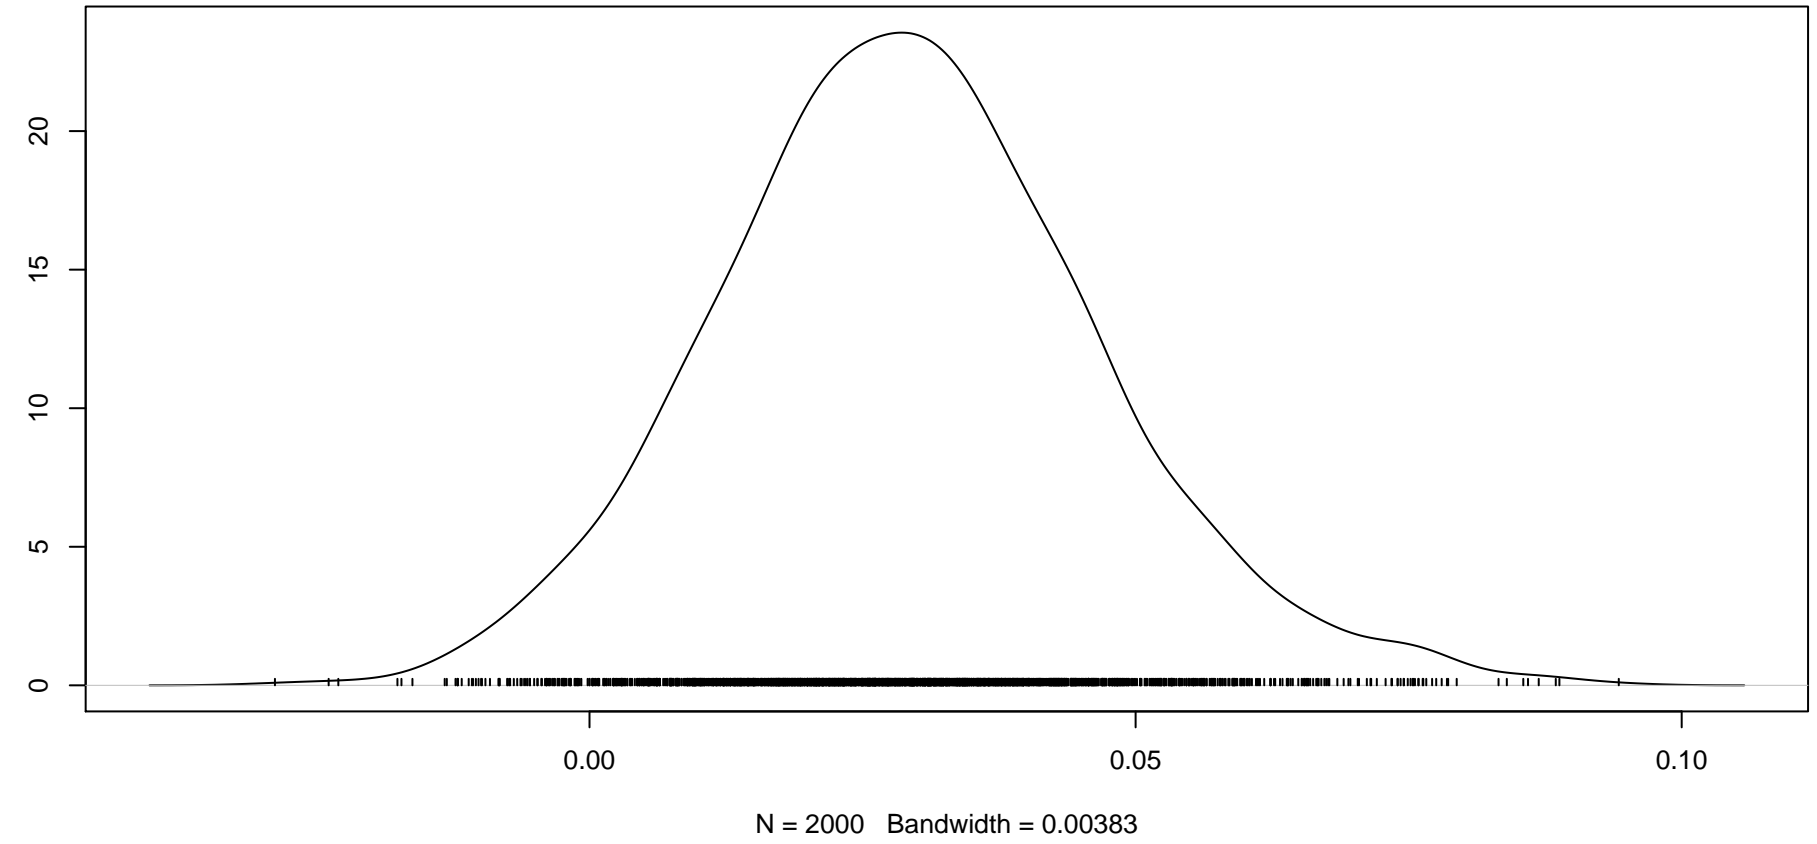

**Trace of (Intercept)**

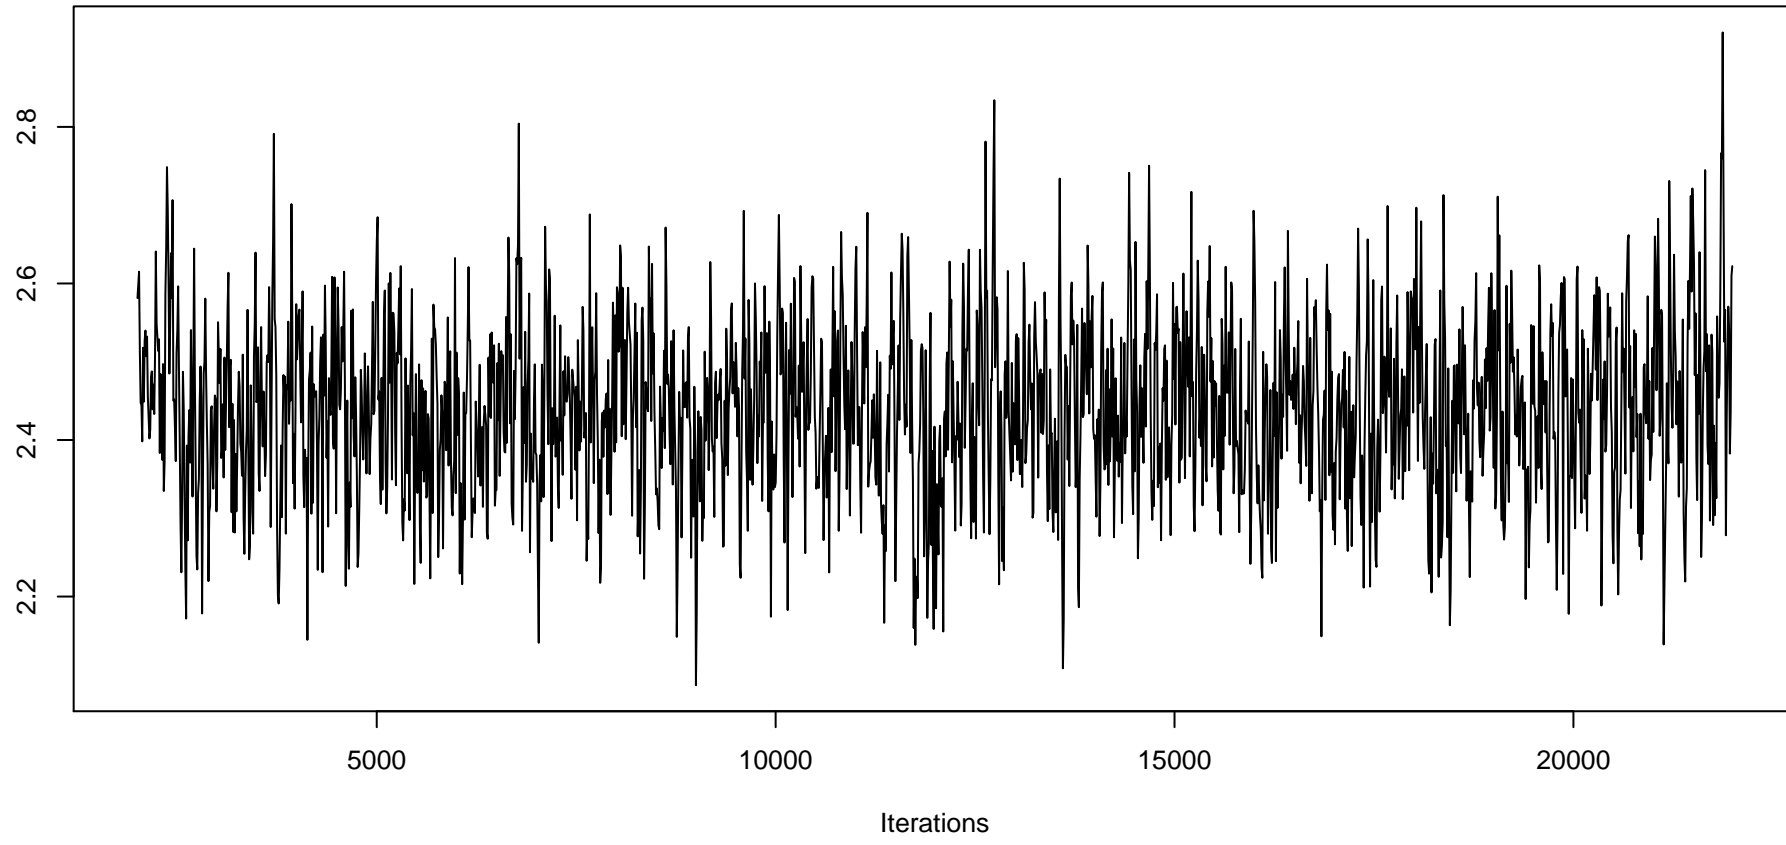

*Lasiurus borealis*

**Density of (Intercept)**

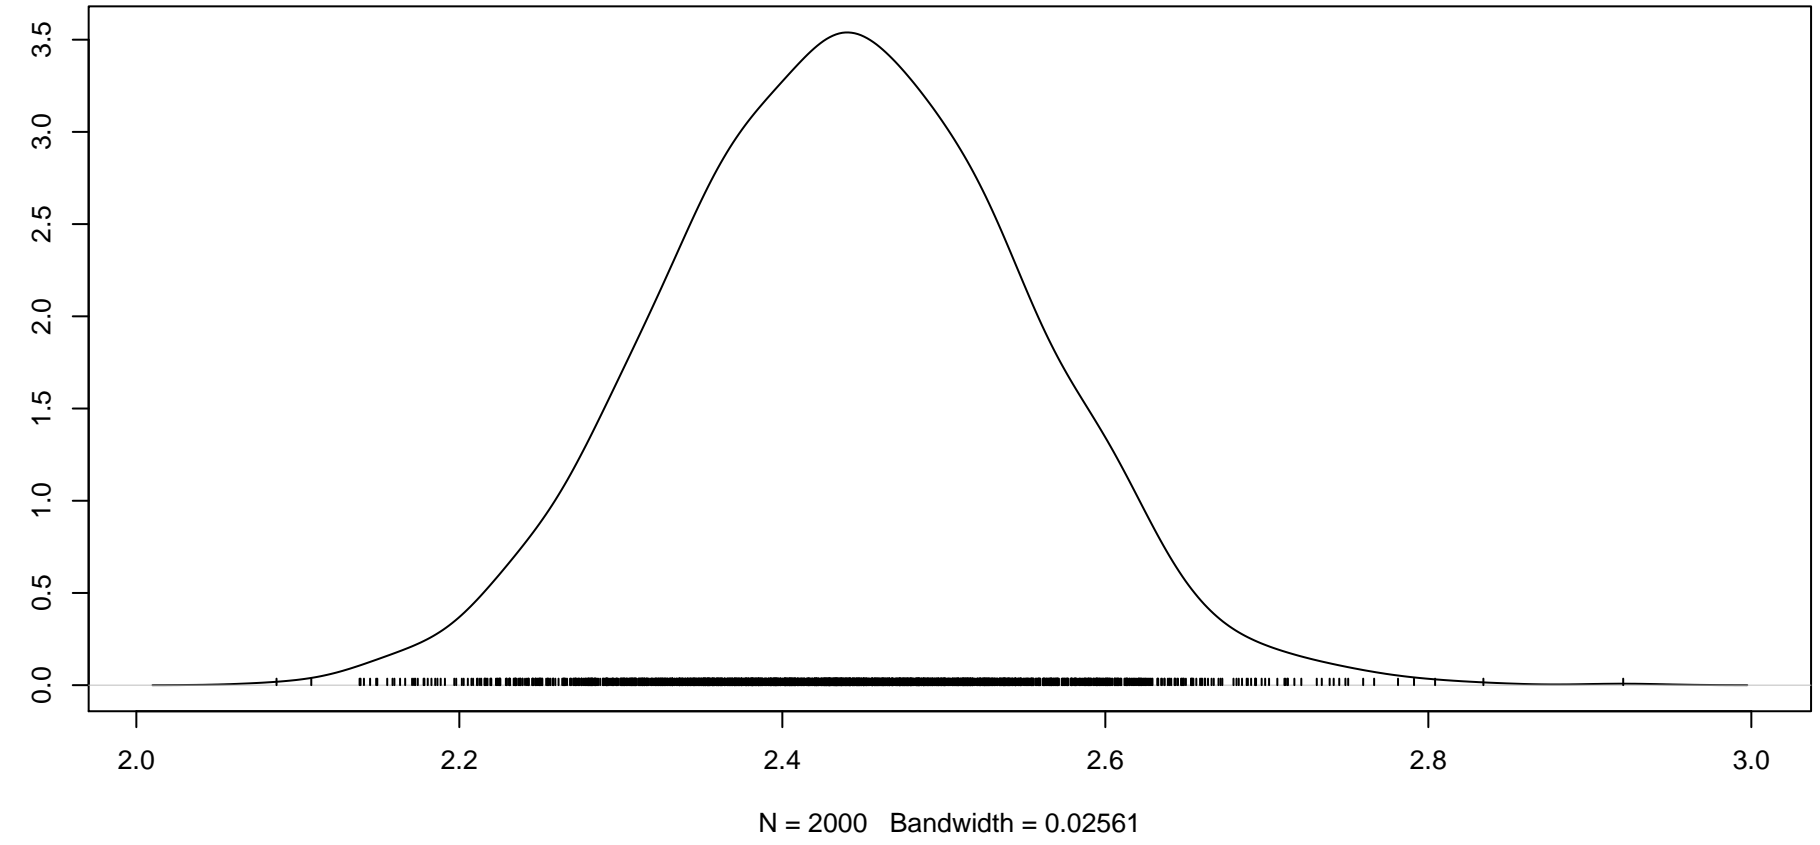

**Trace of urban**

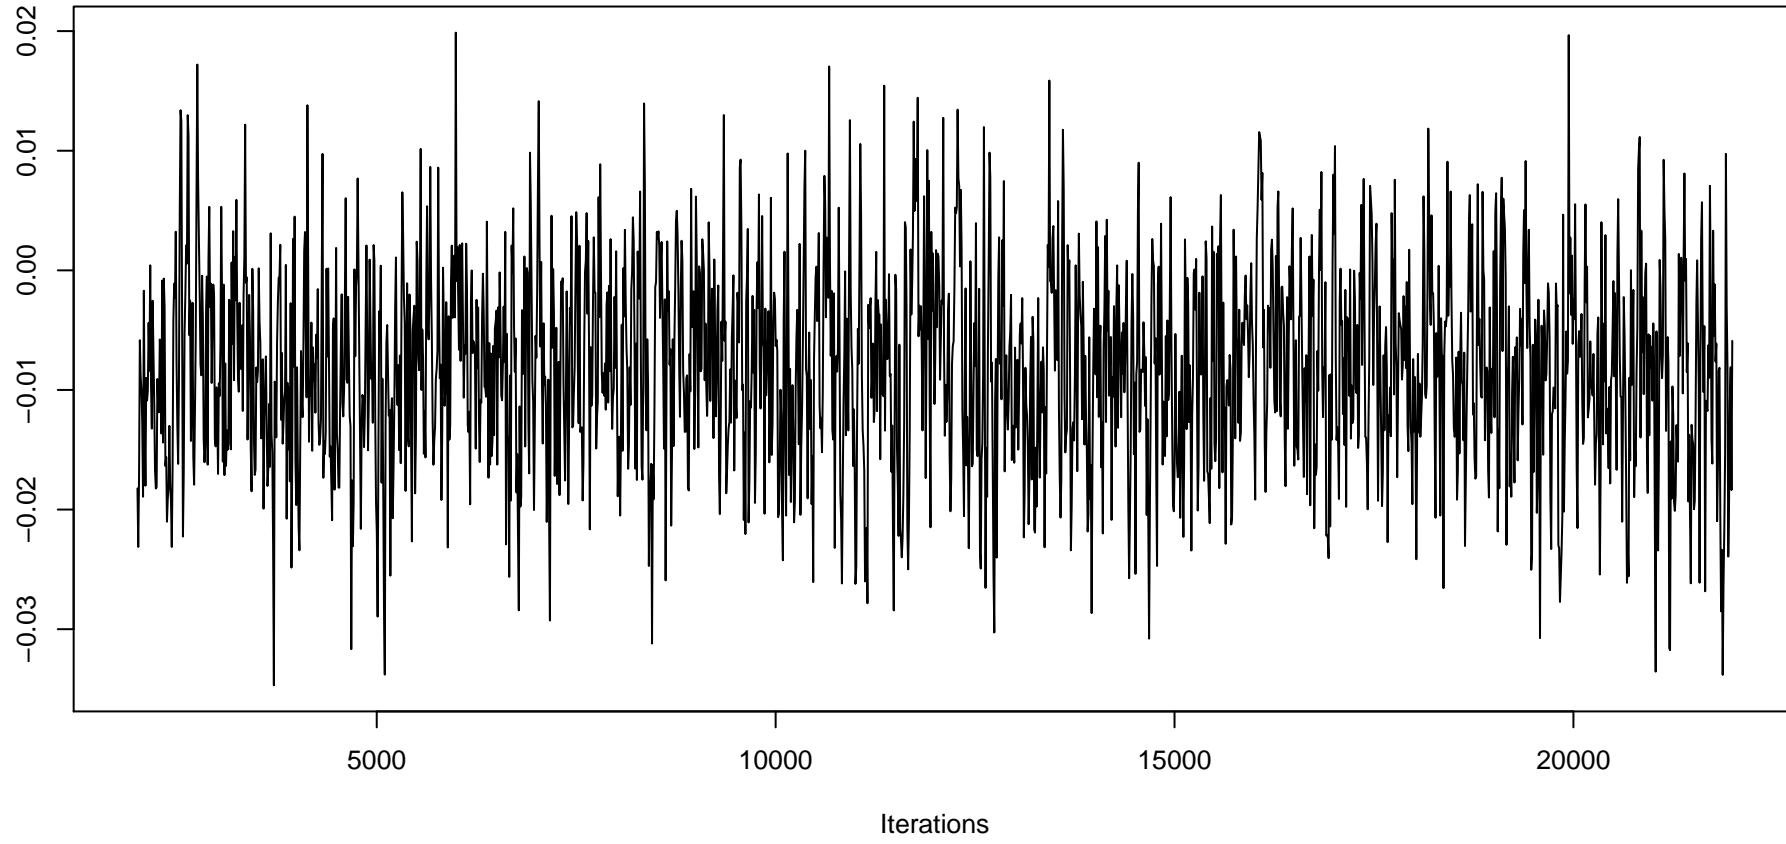

**Density of urban**

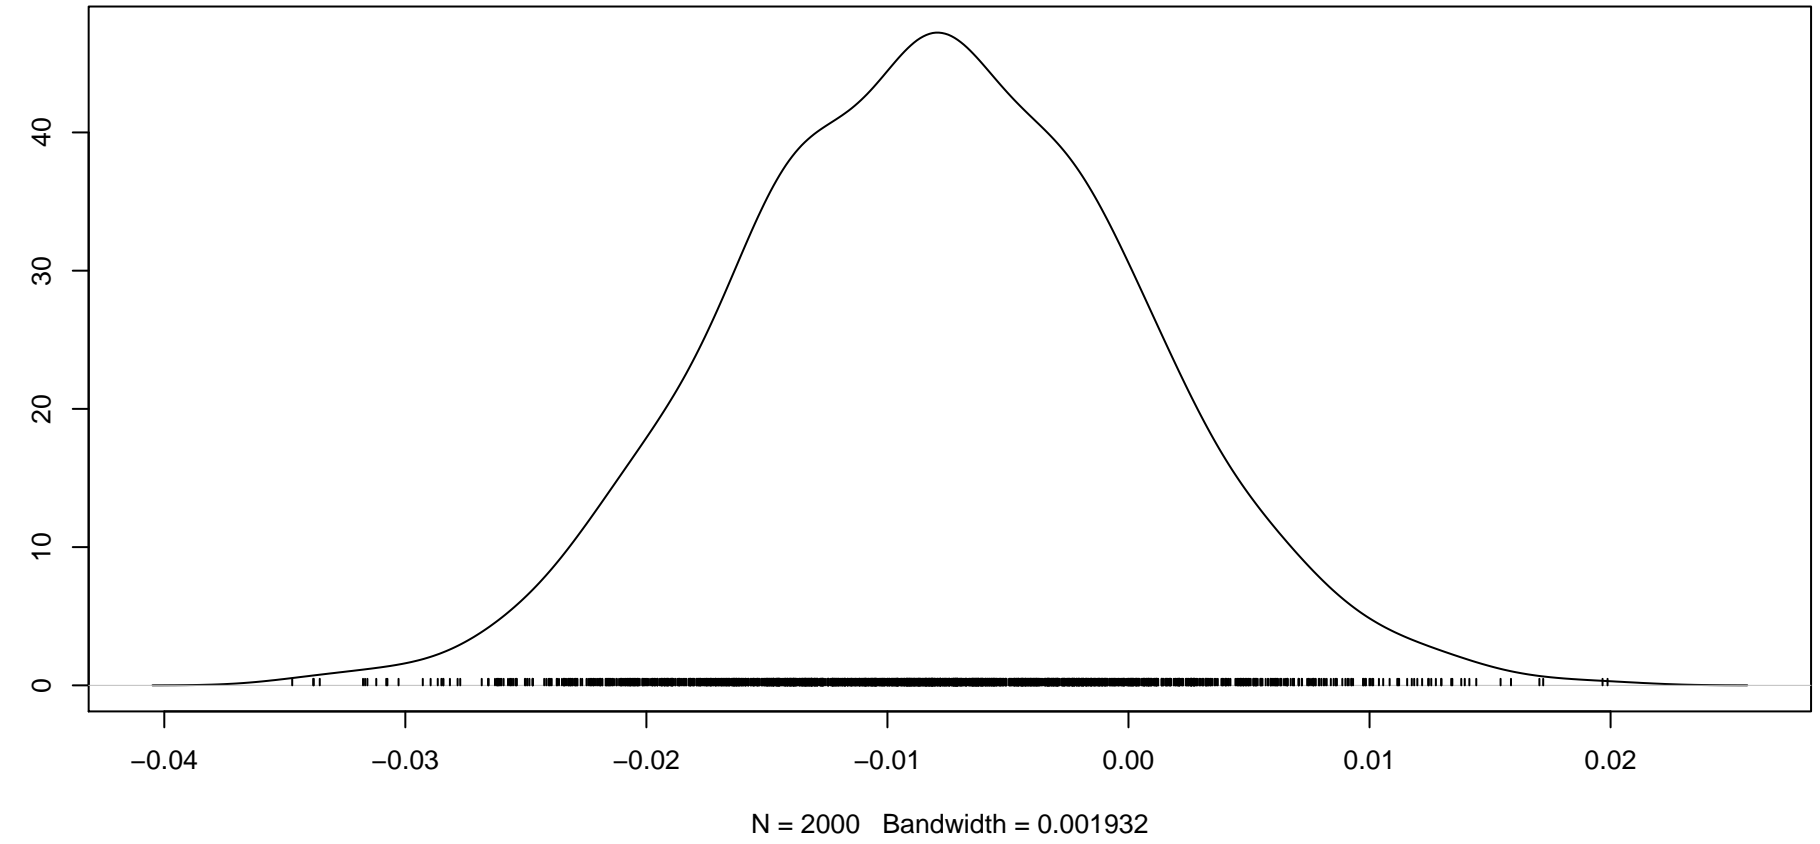

**Trace of (Intercept)**

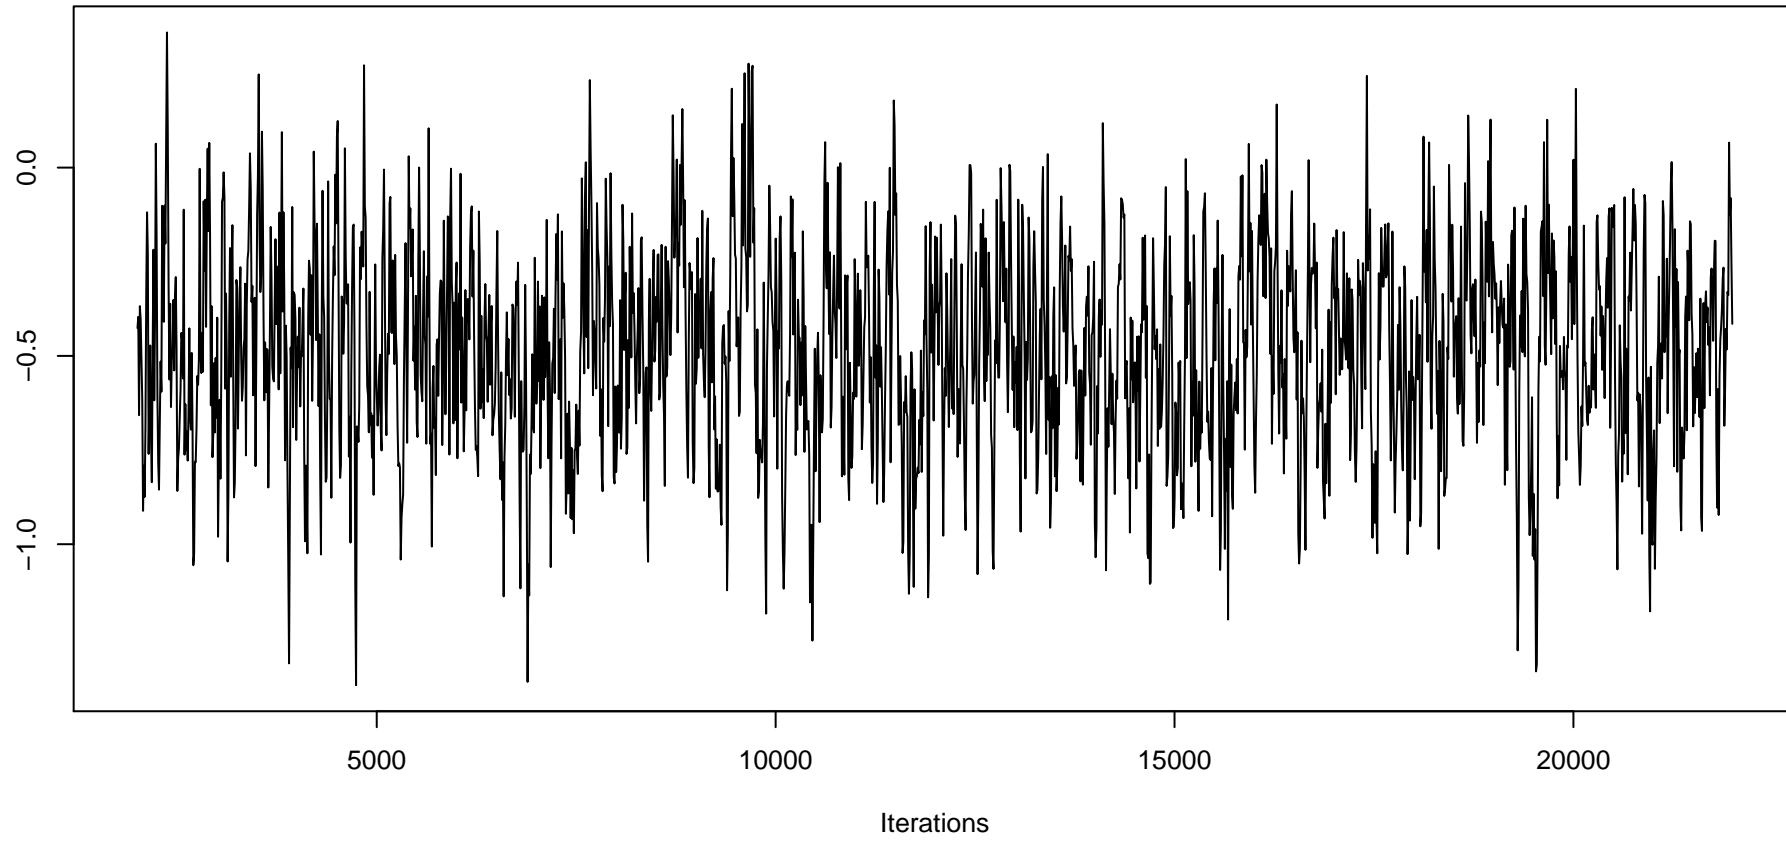

*Lasiurus cinereus*

**Density of (Intercept)**

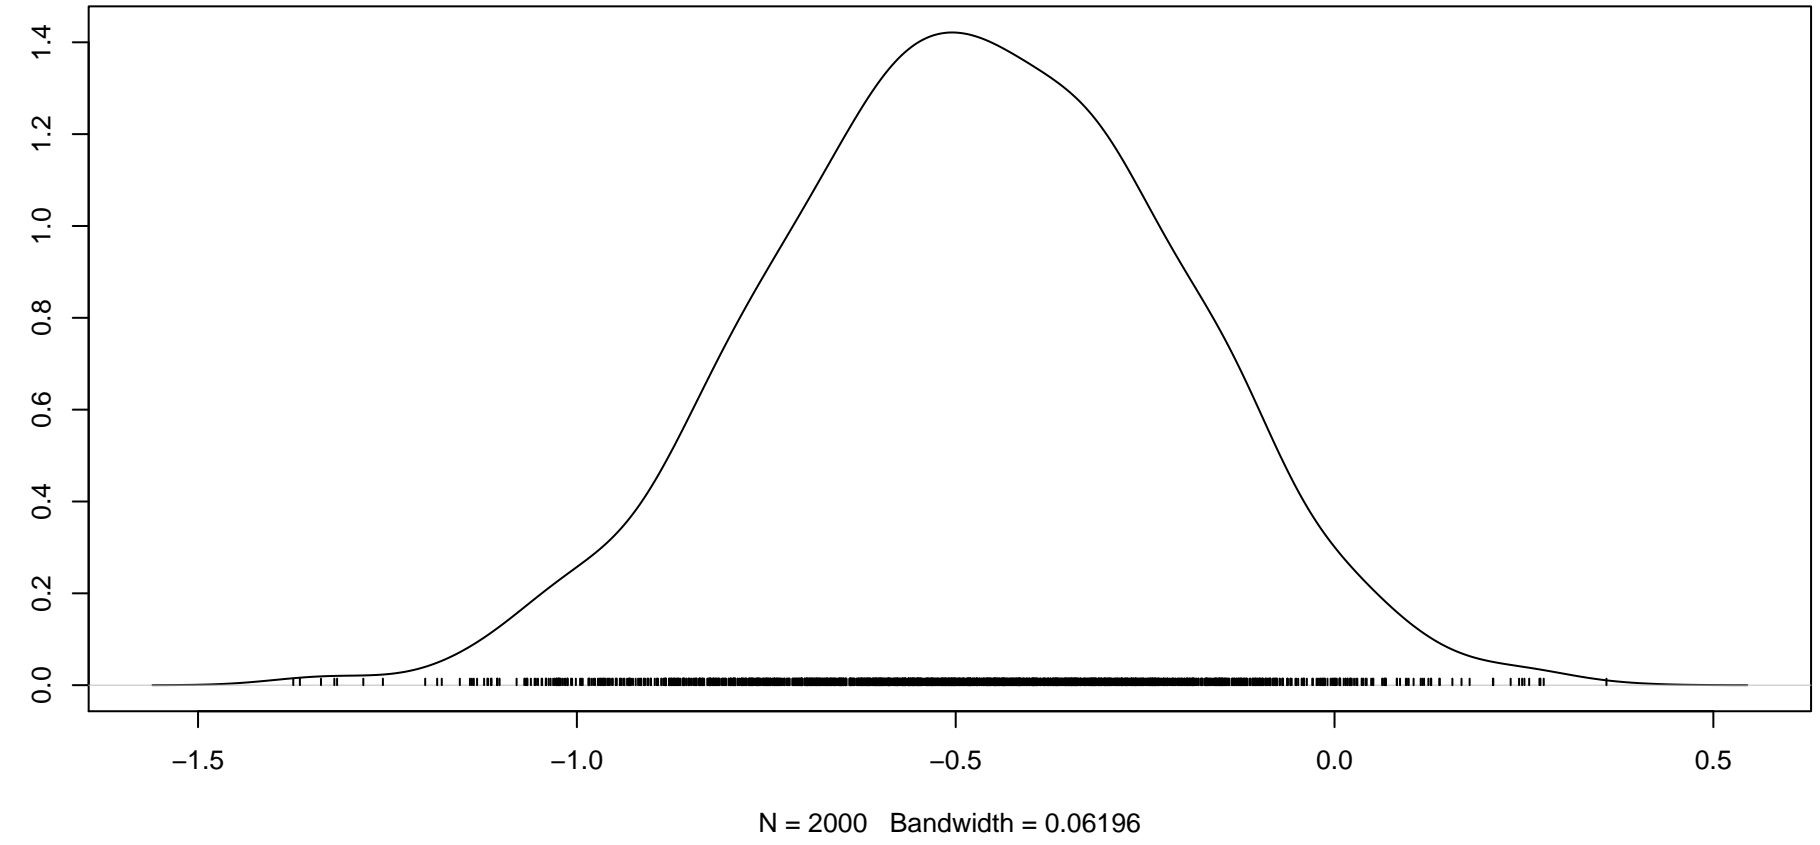

**Trace of urban**

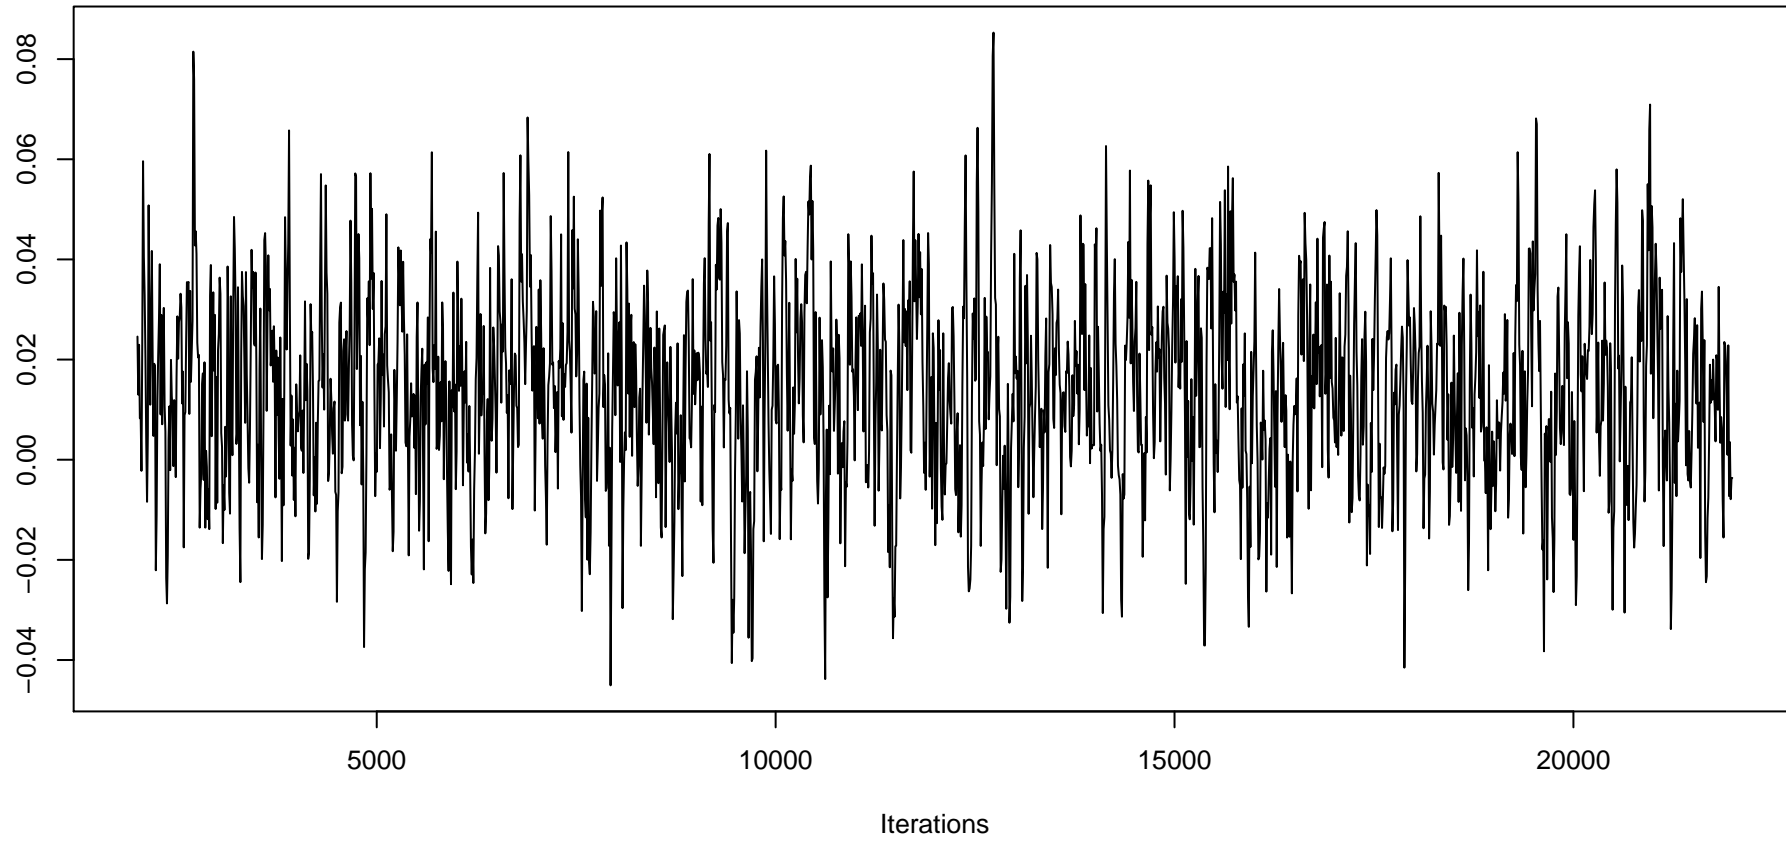

**Density of urban**

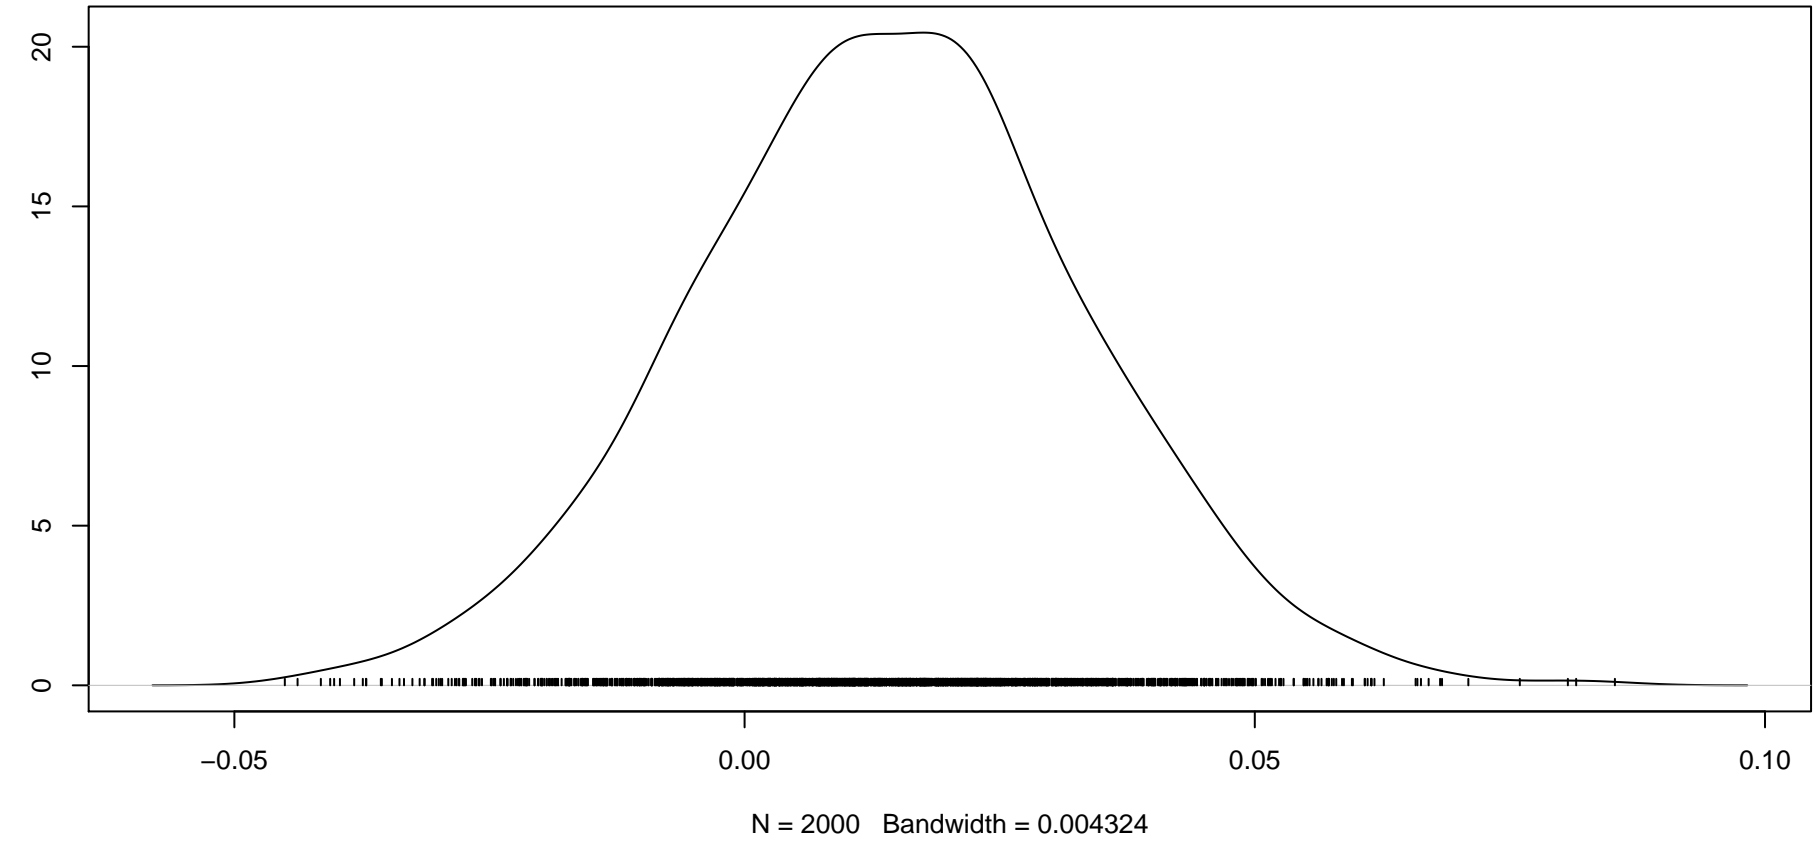

**Trace of (Intercept)**

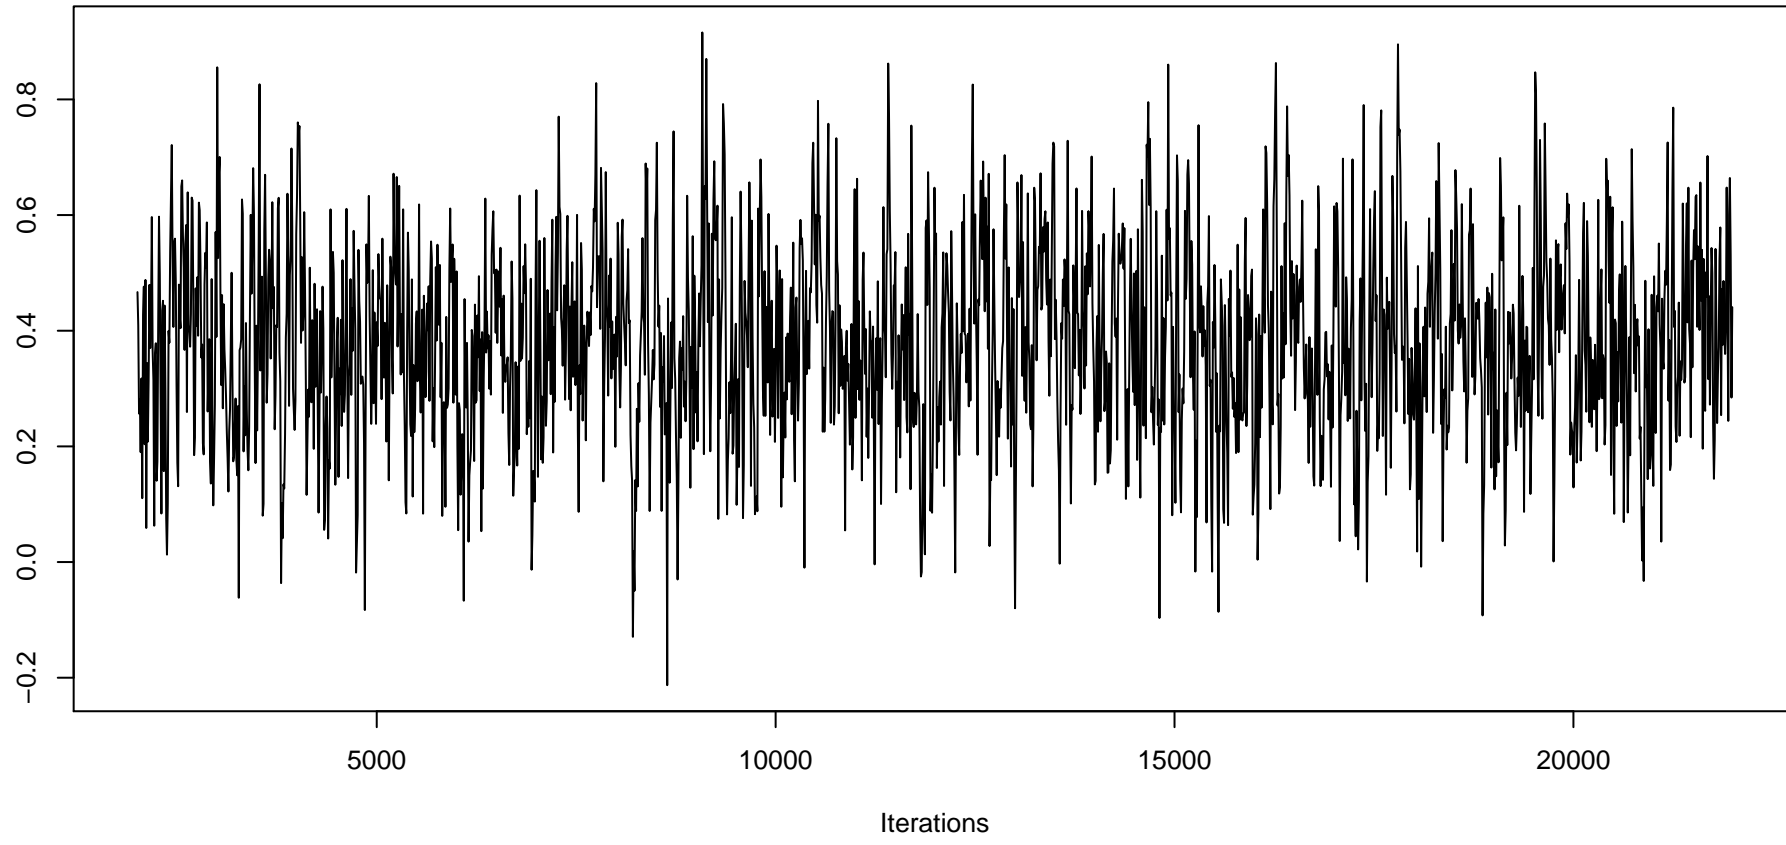

**Density of (Intercept)**

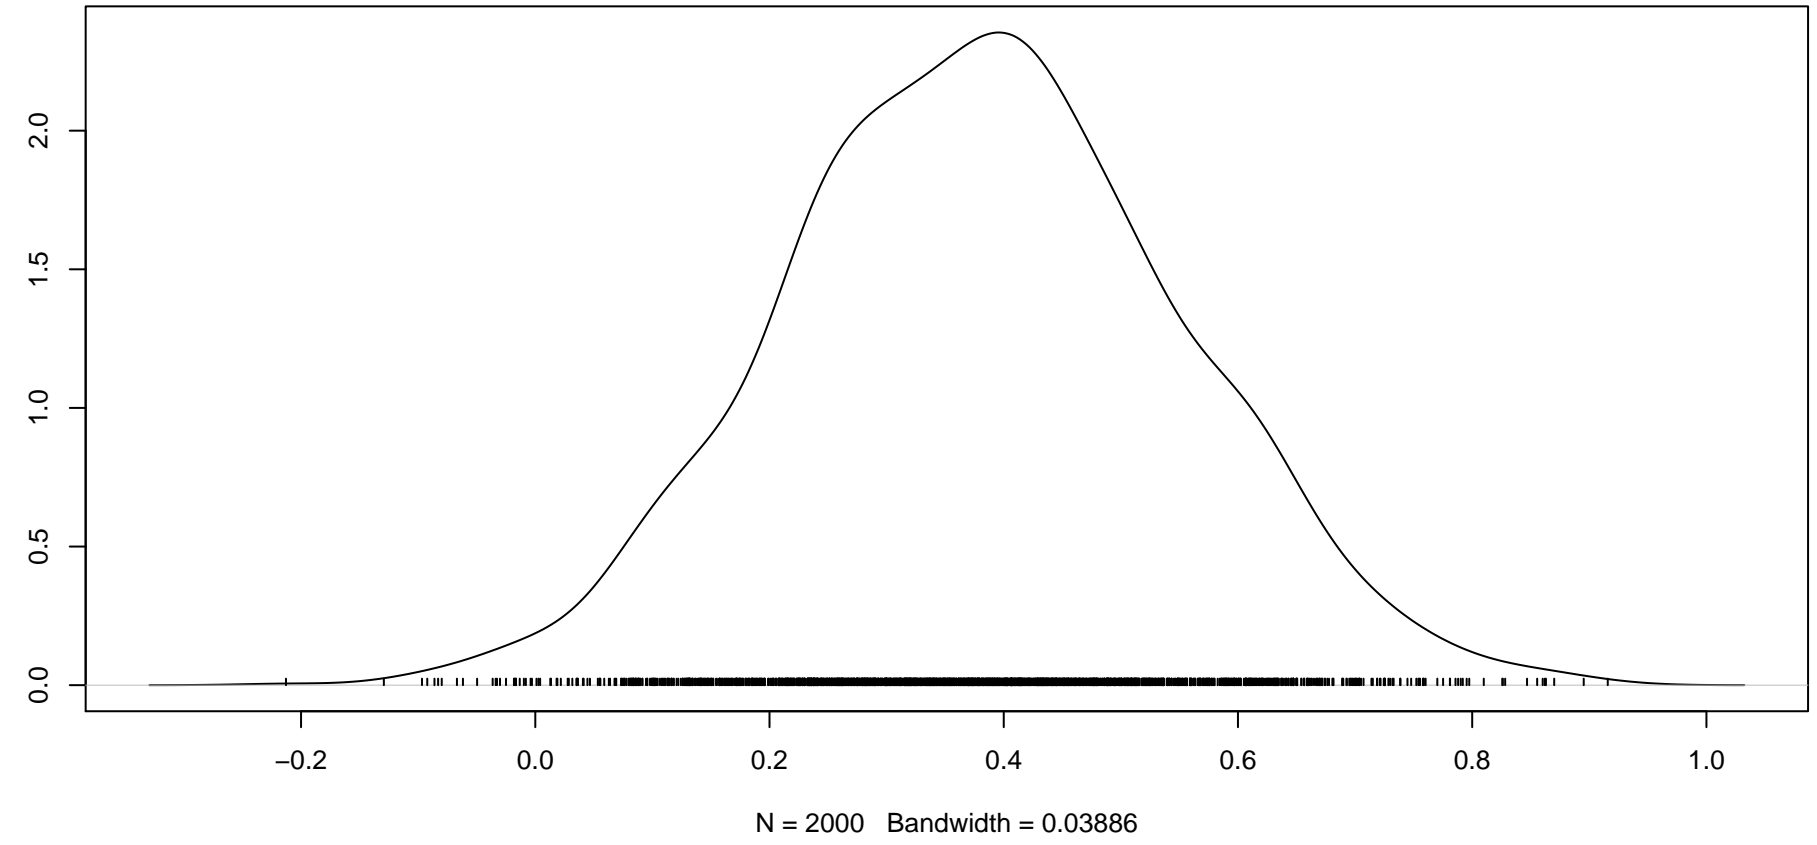

**Trace of urban**

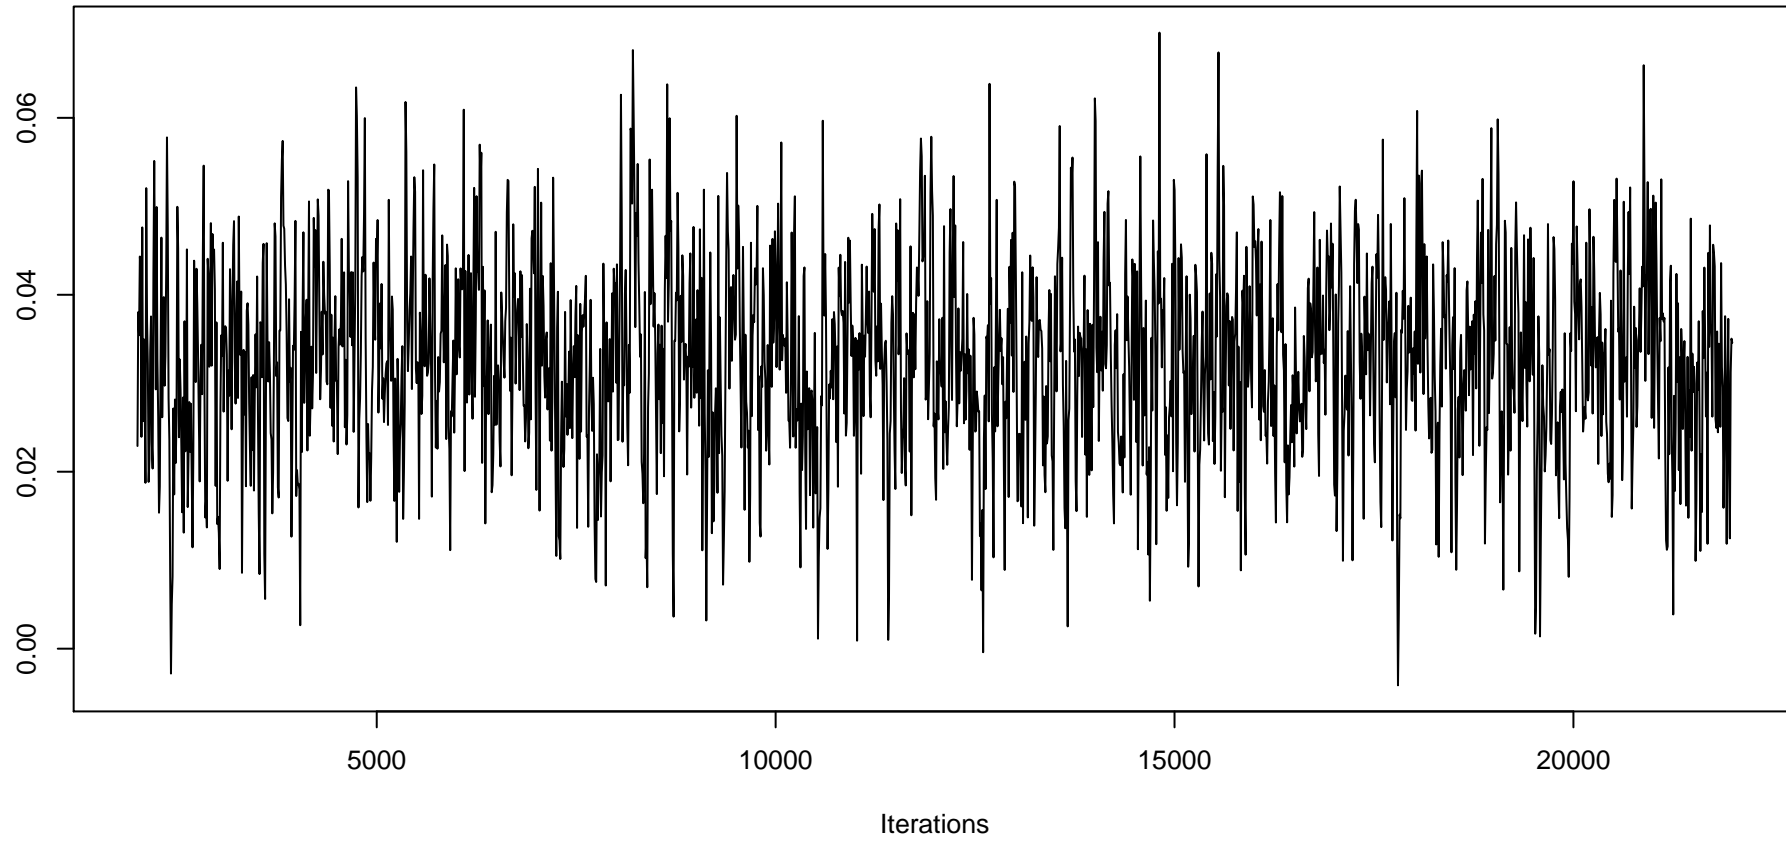

**Density of urban**

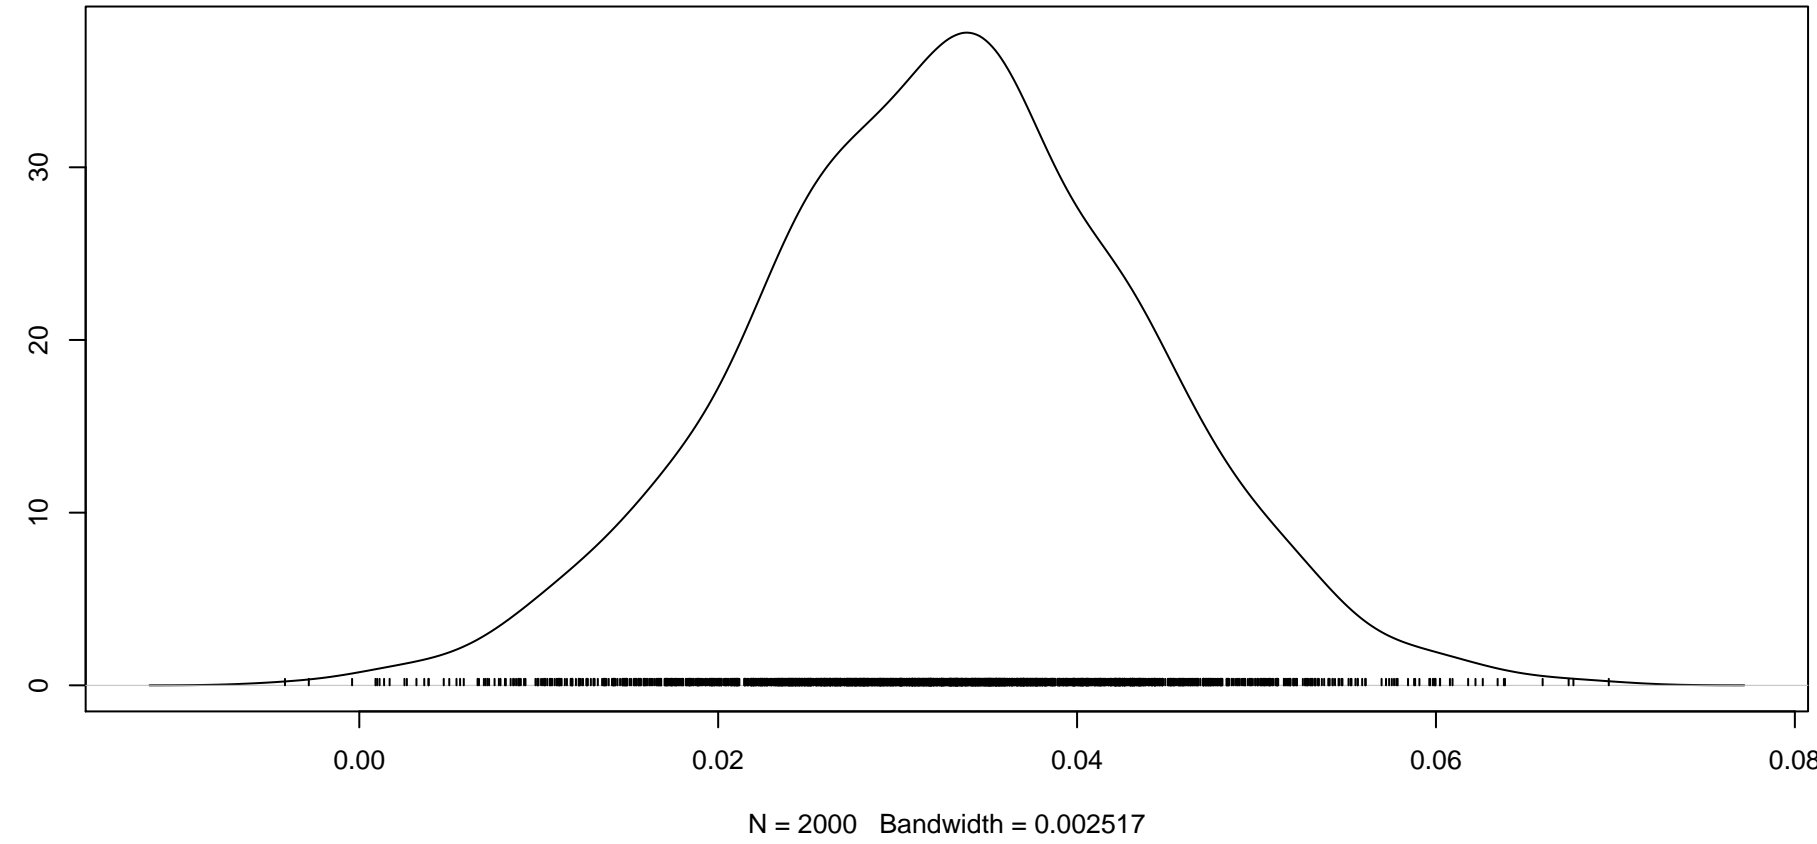

*Nycticeius humeralis*

**Trace of (Intercept)**

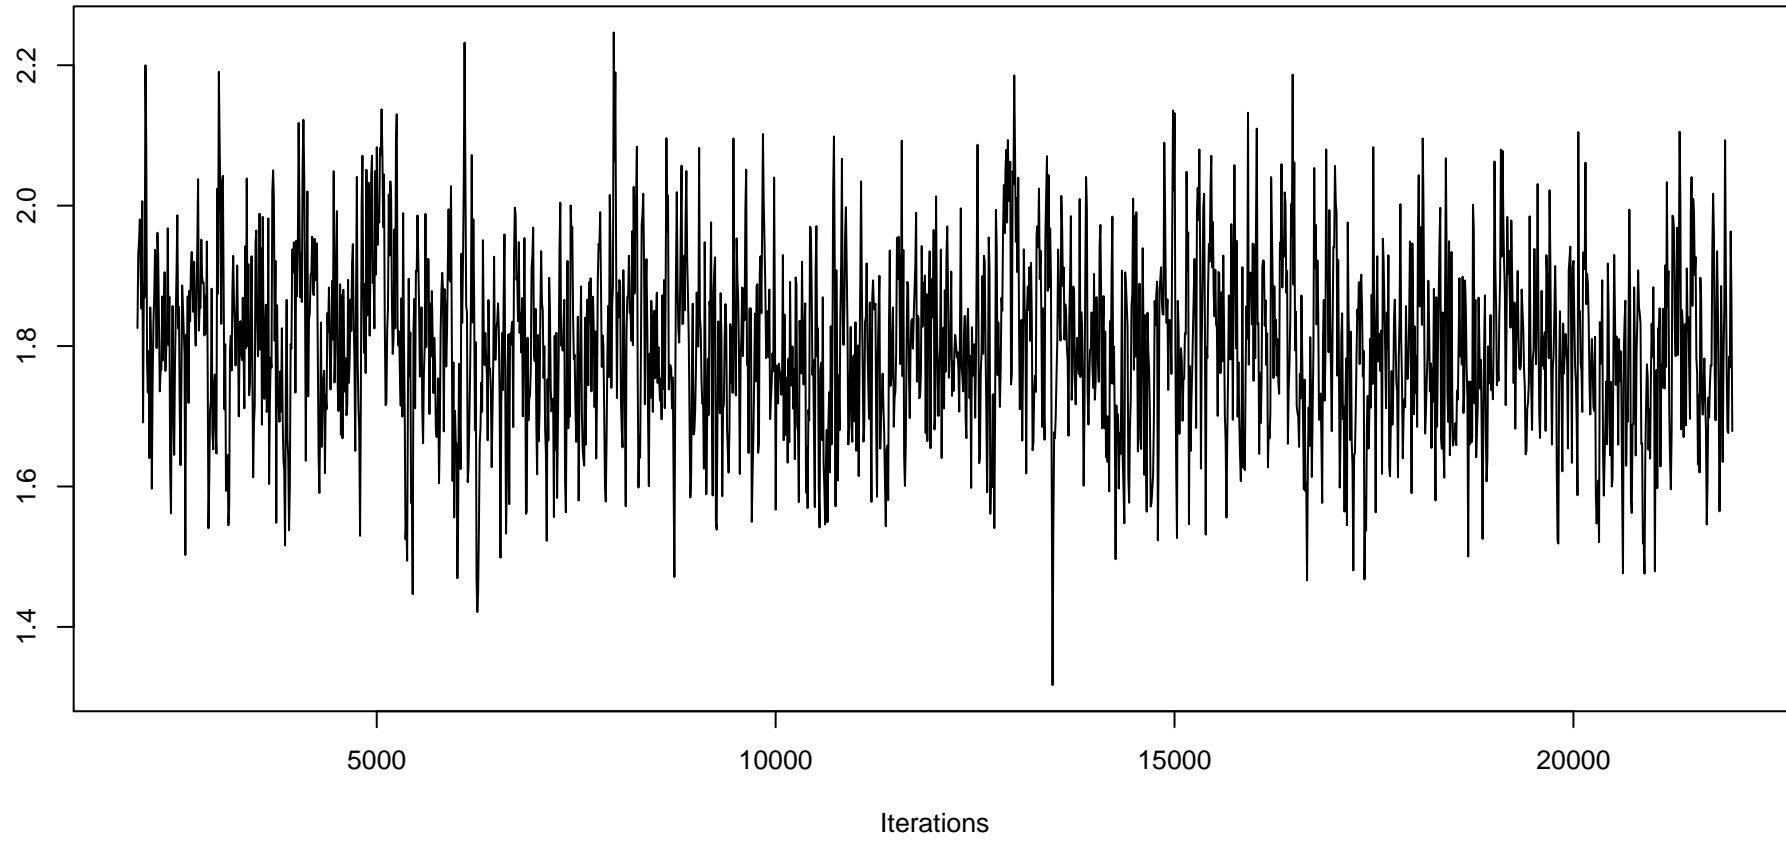

**Density of (Intercept)**

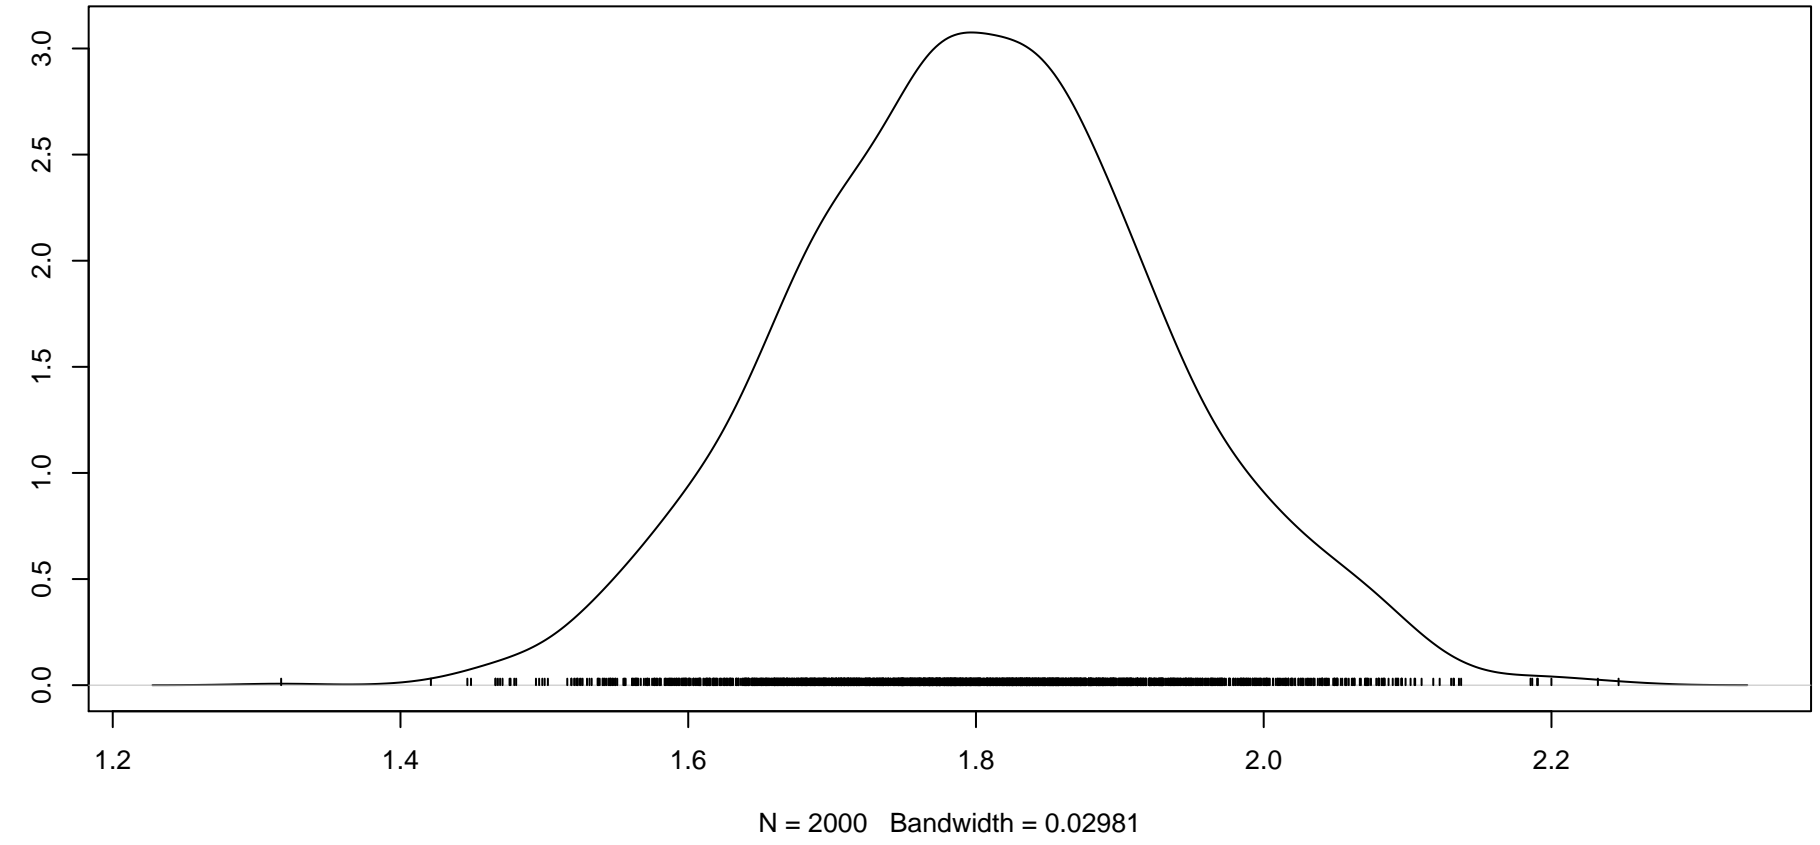

**Trace of urban**

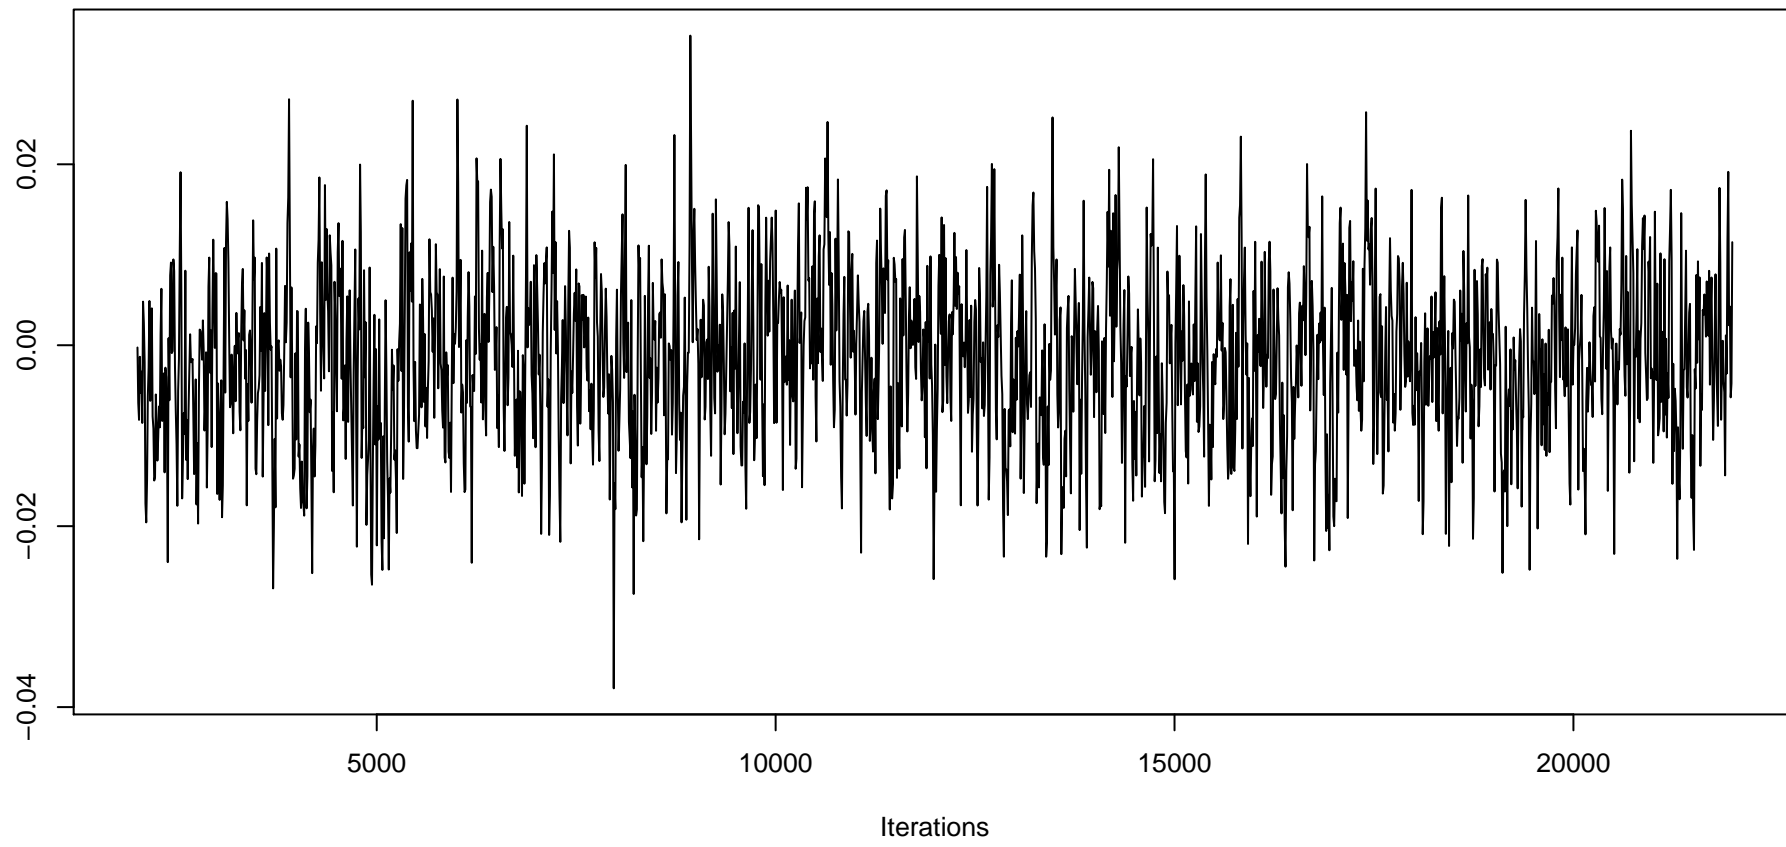

**Density of urban**

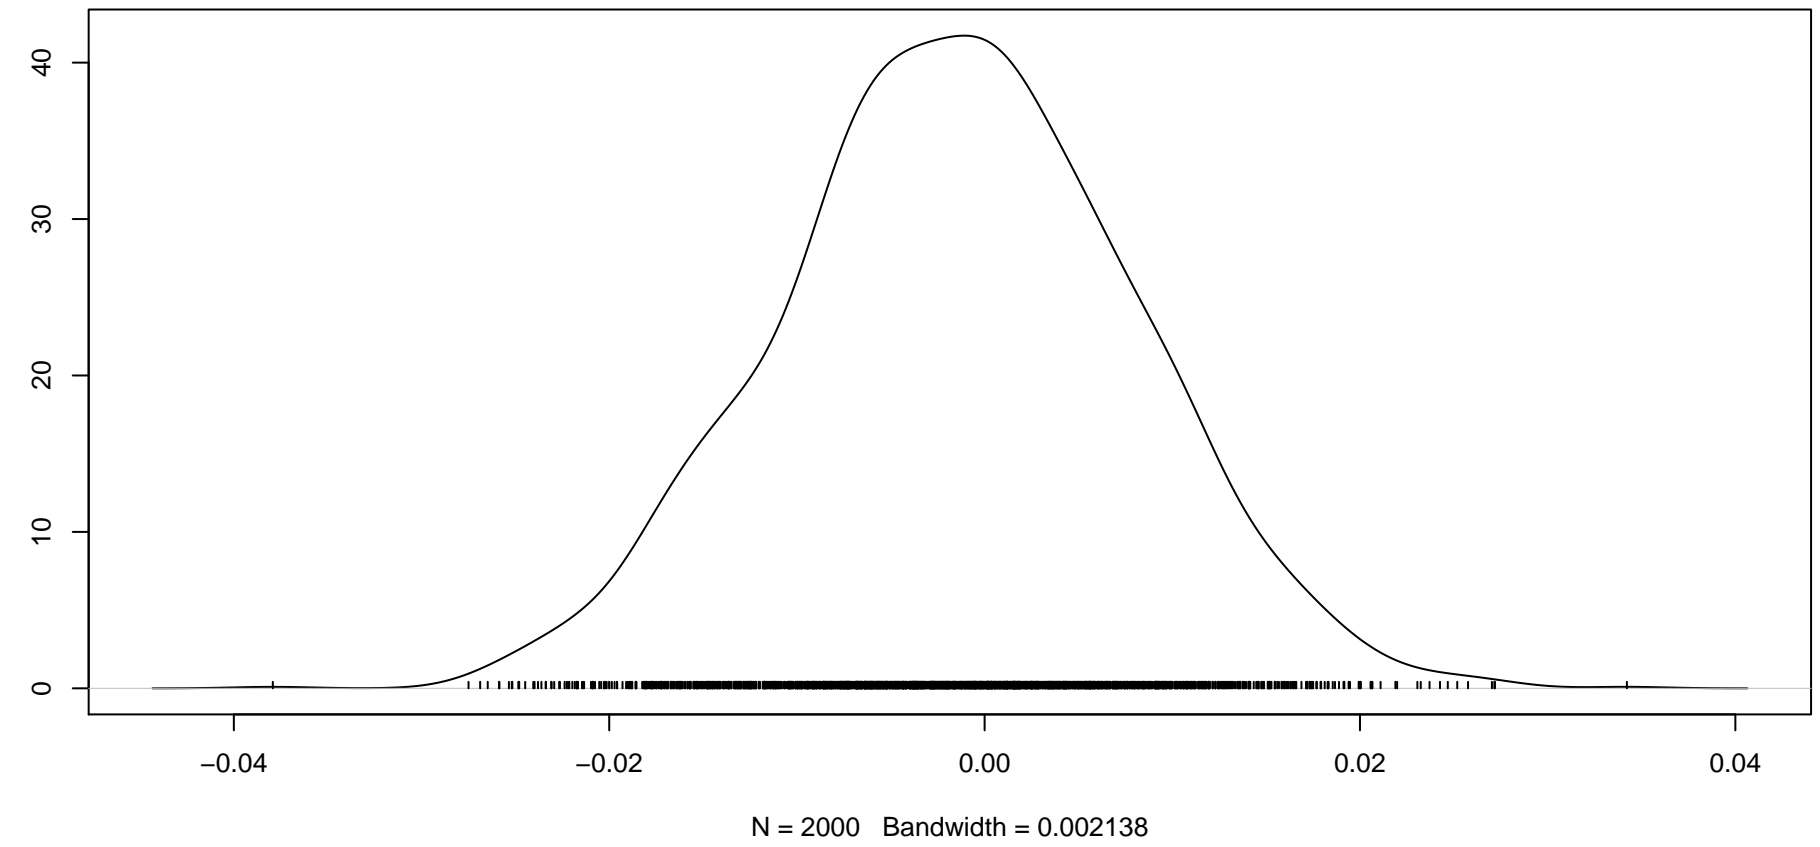

*Perimyotis subflavus*

**Trace of (Intercept)**

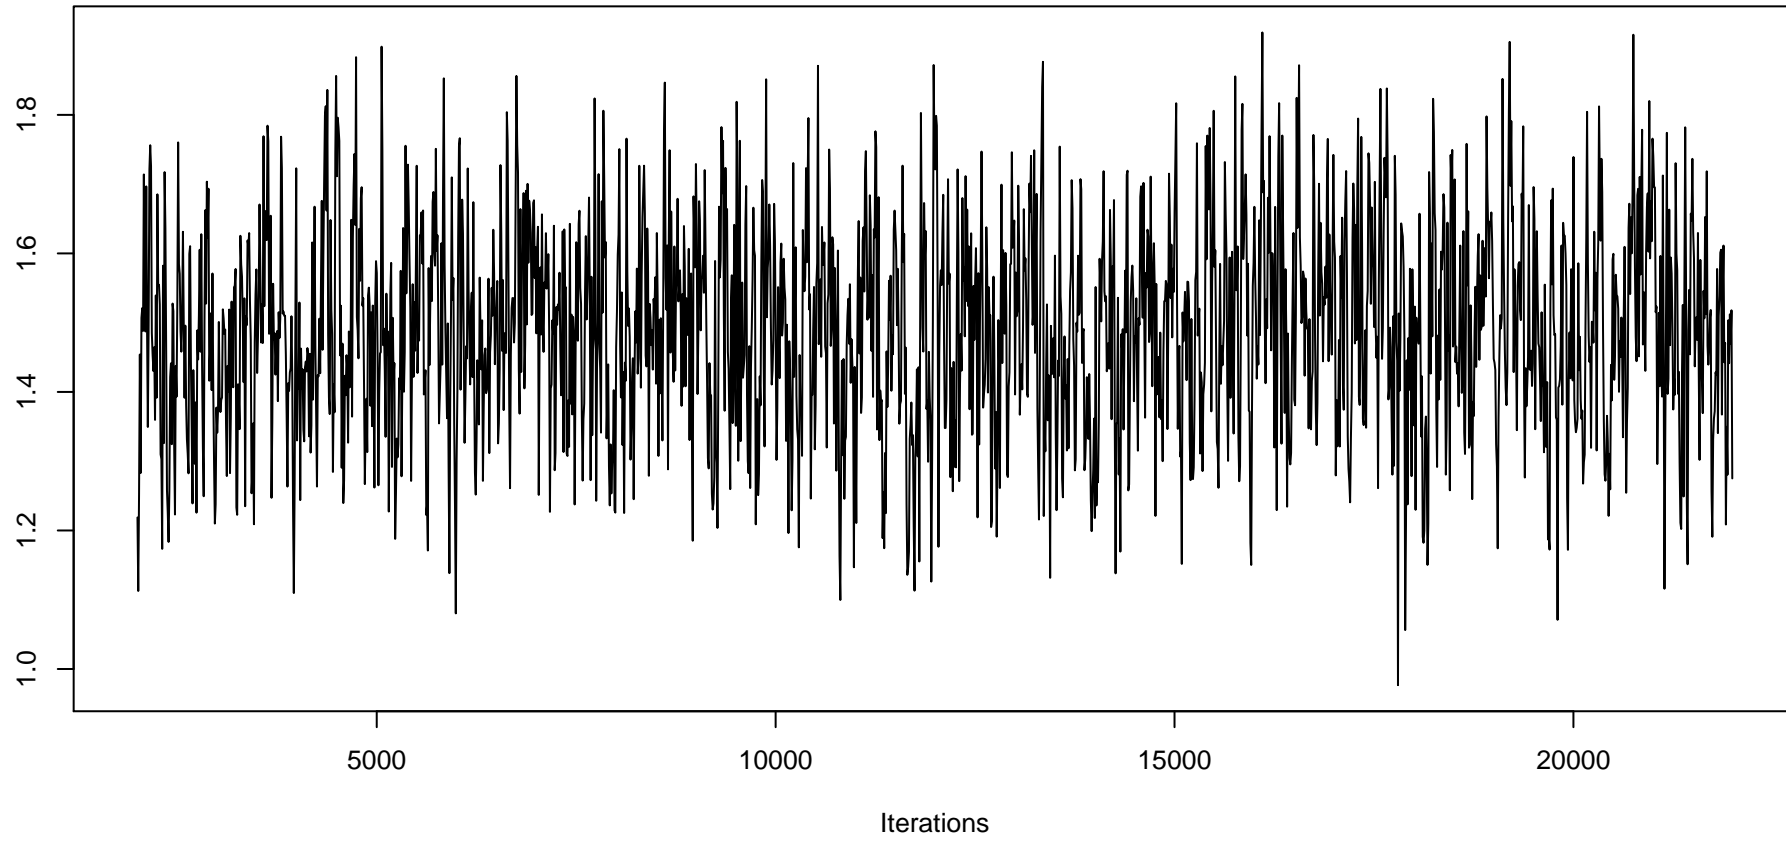

**Density of (Intercept)**

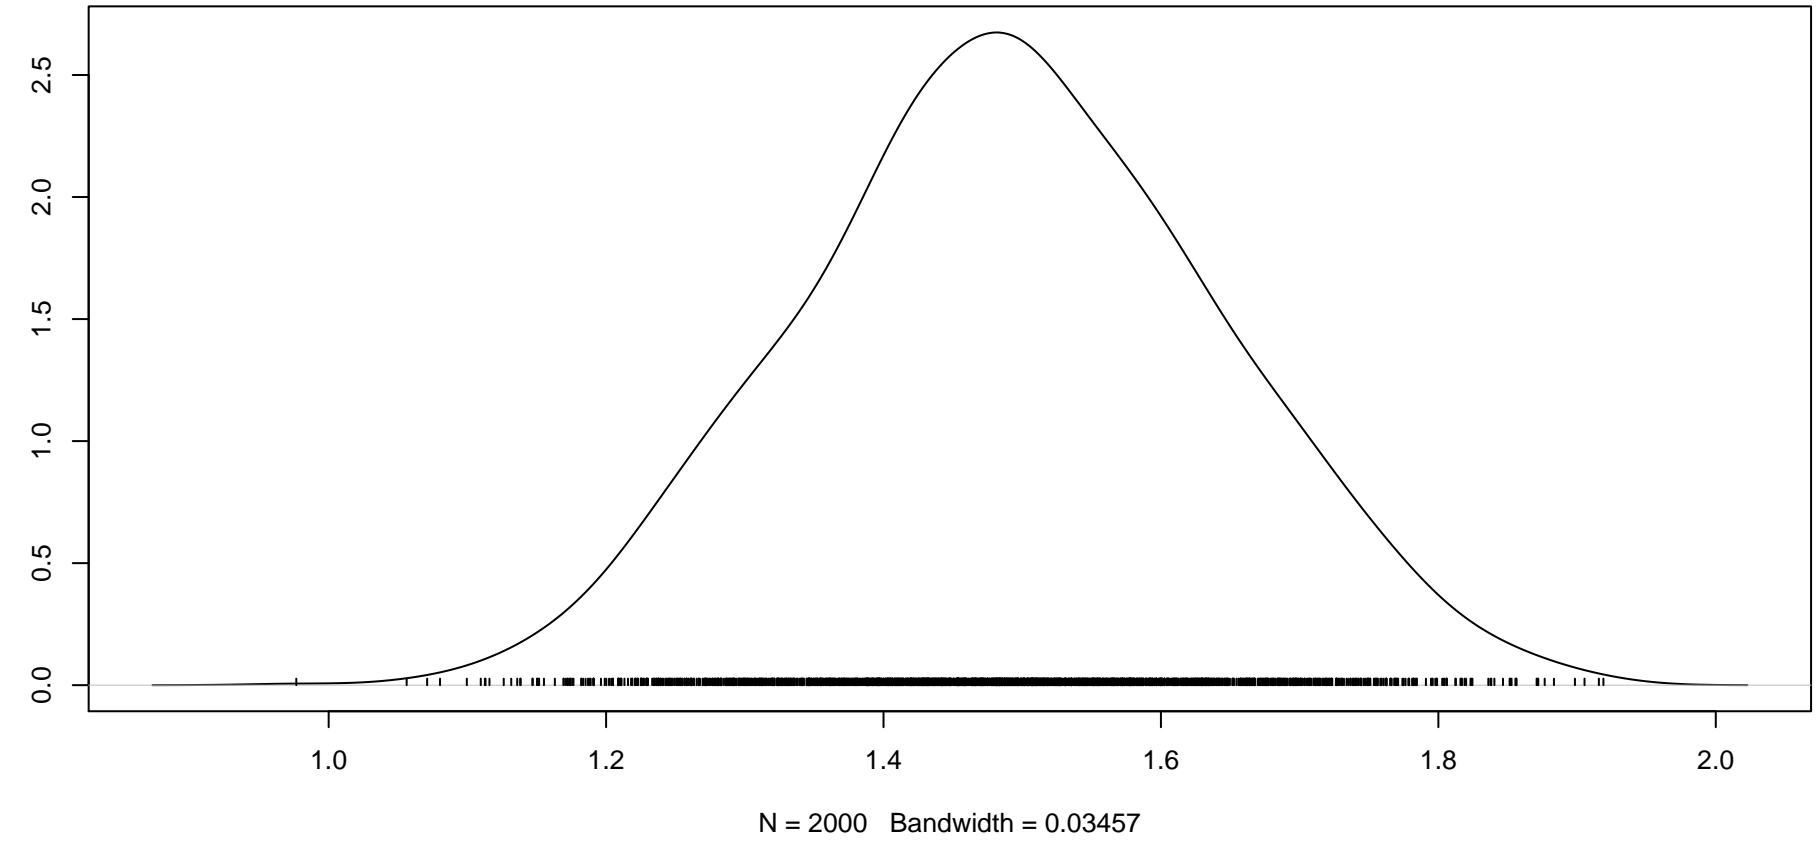

**Trace of urban**

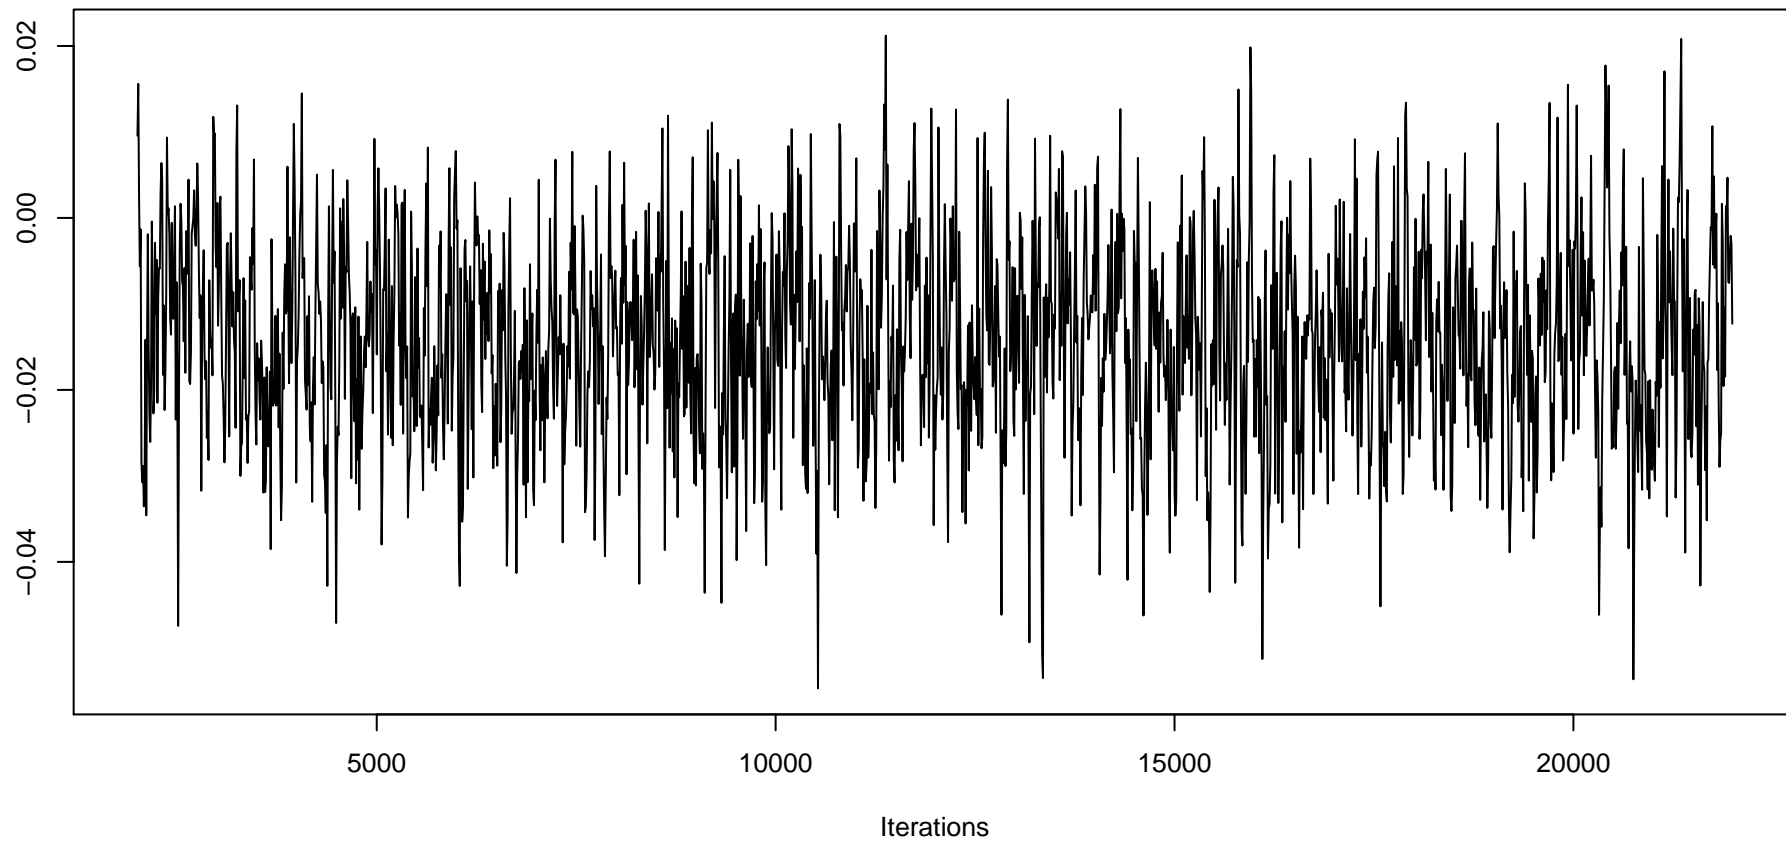

**Density of urban**

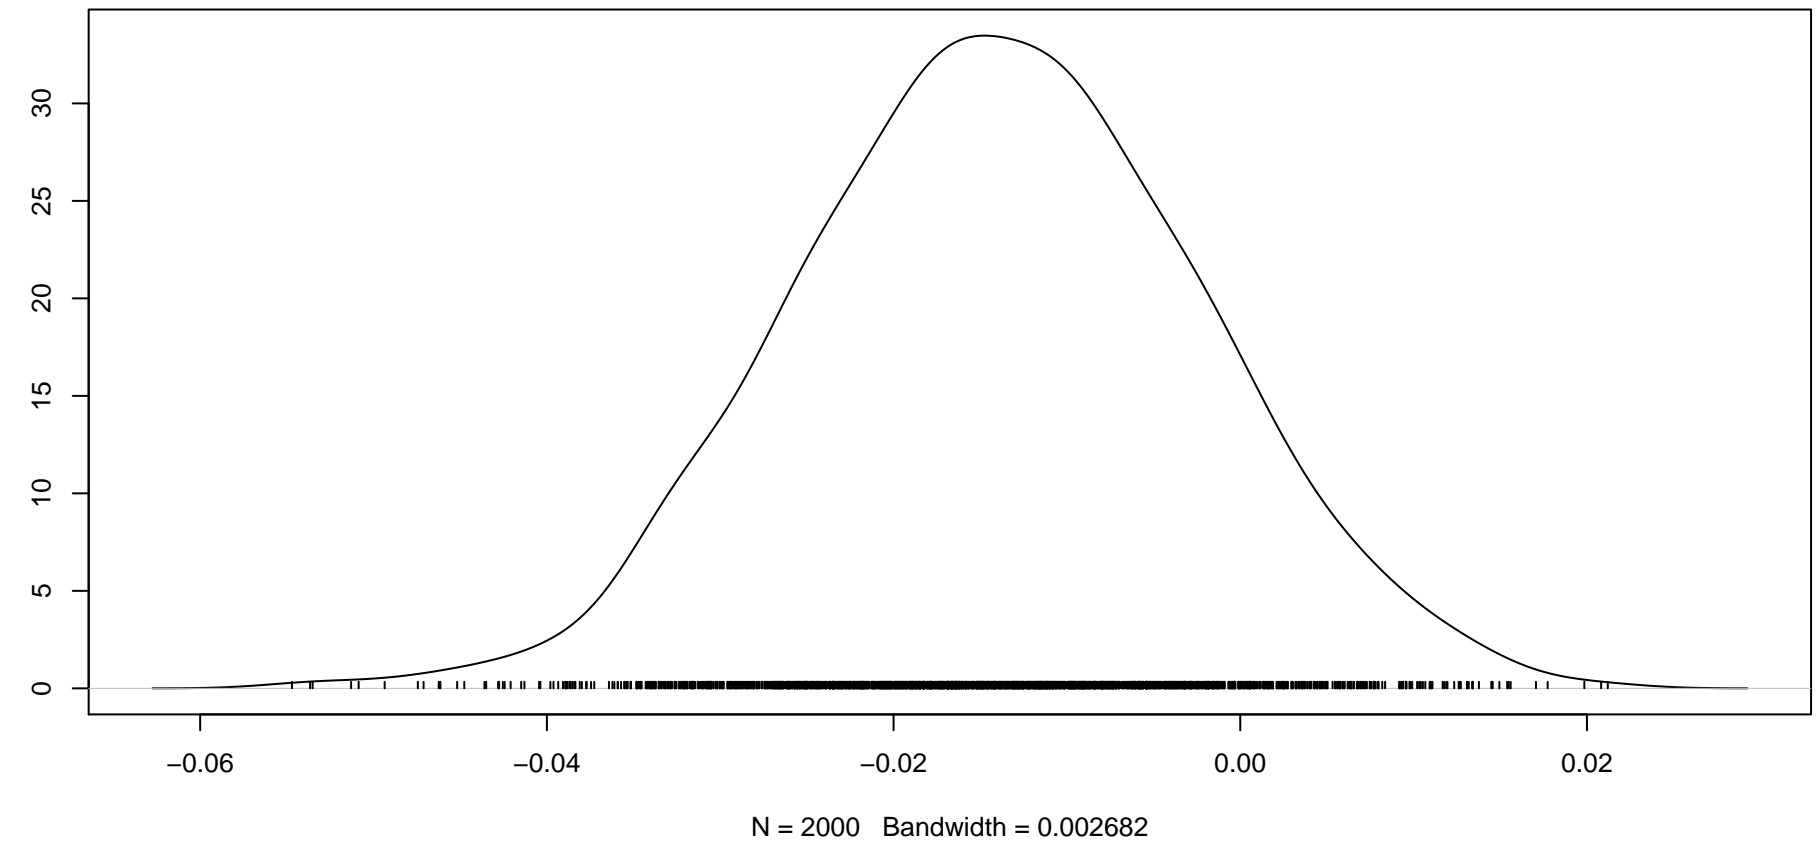

*Tadarida brasiliensis*

**Trace of (Intercept)**

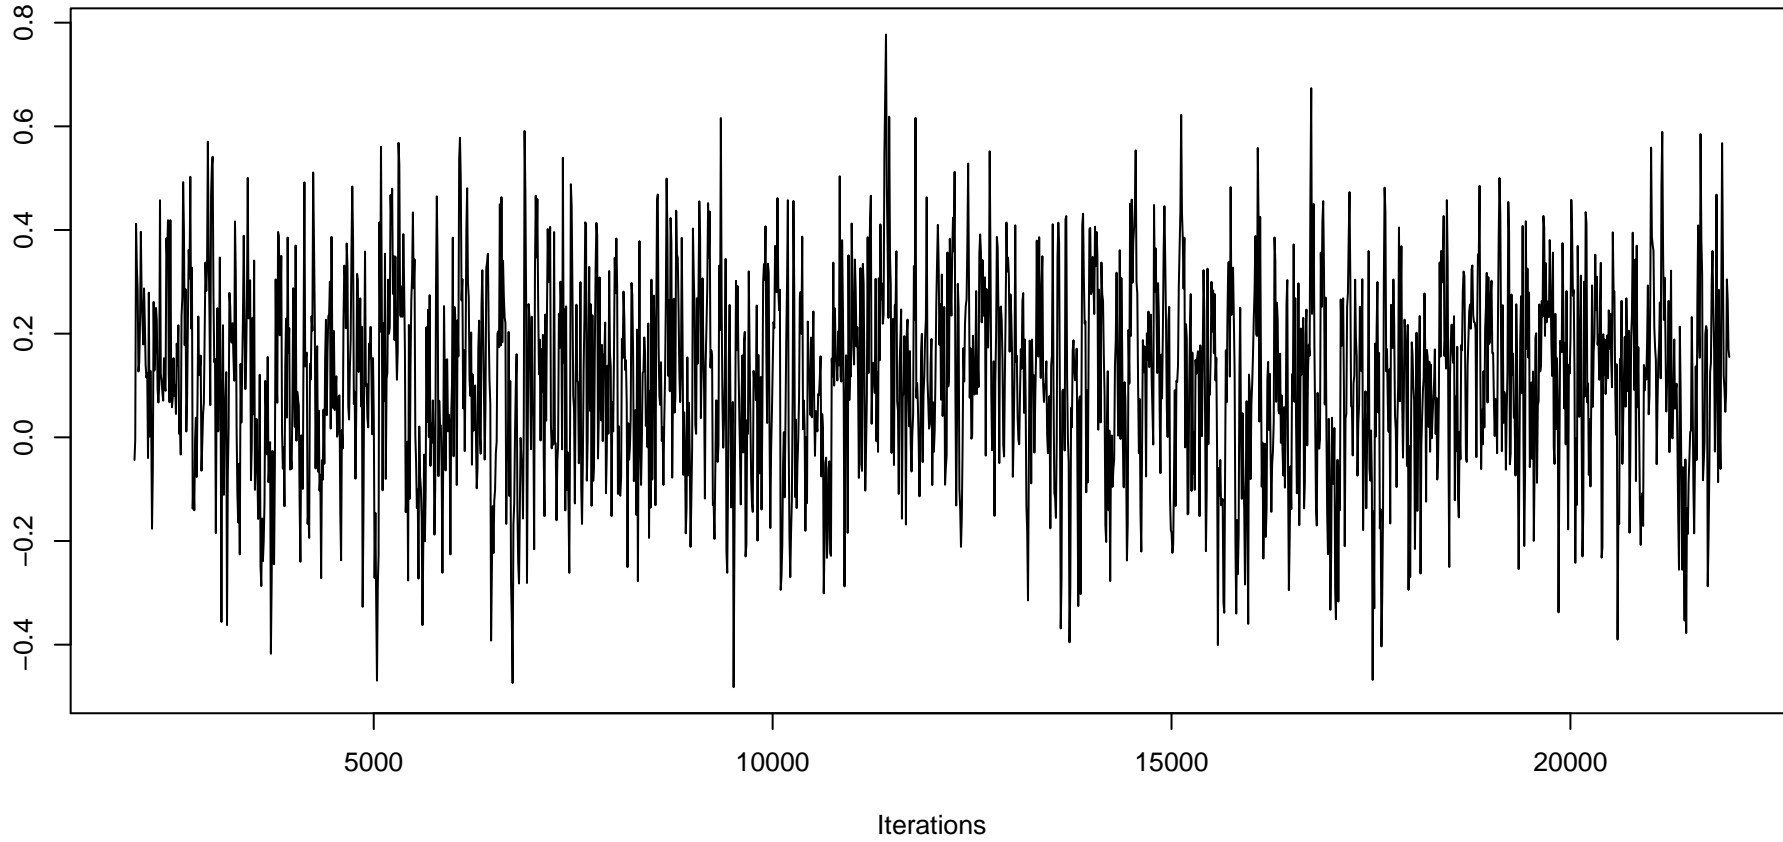

**Density of (Intercept)**

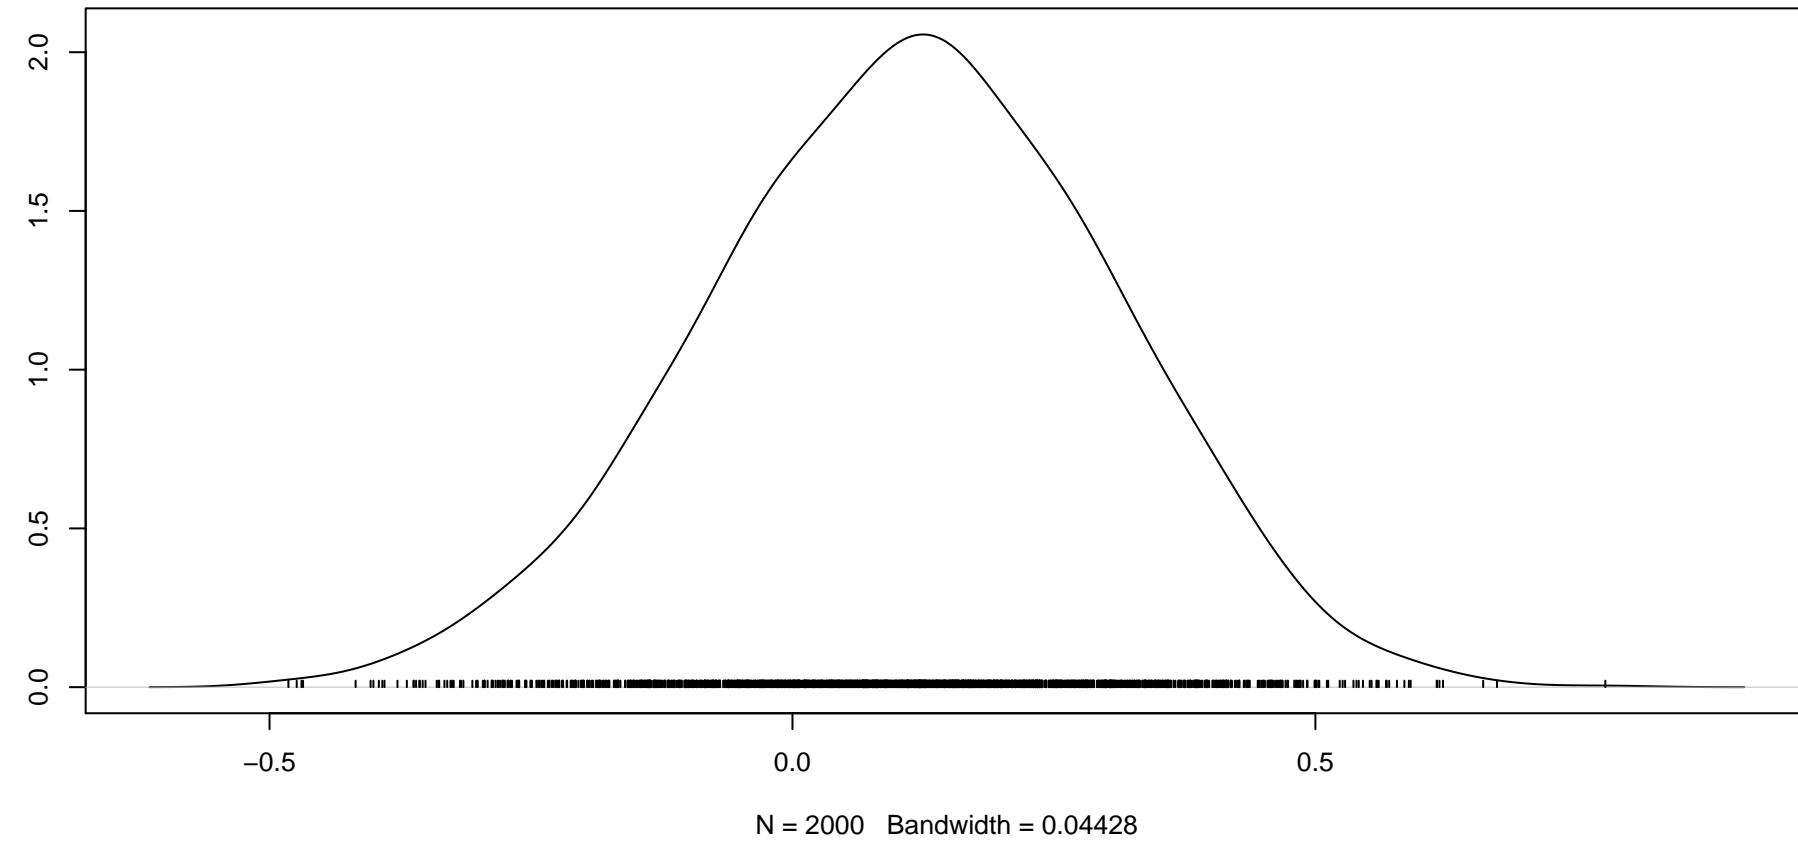

**Trace of urban**

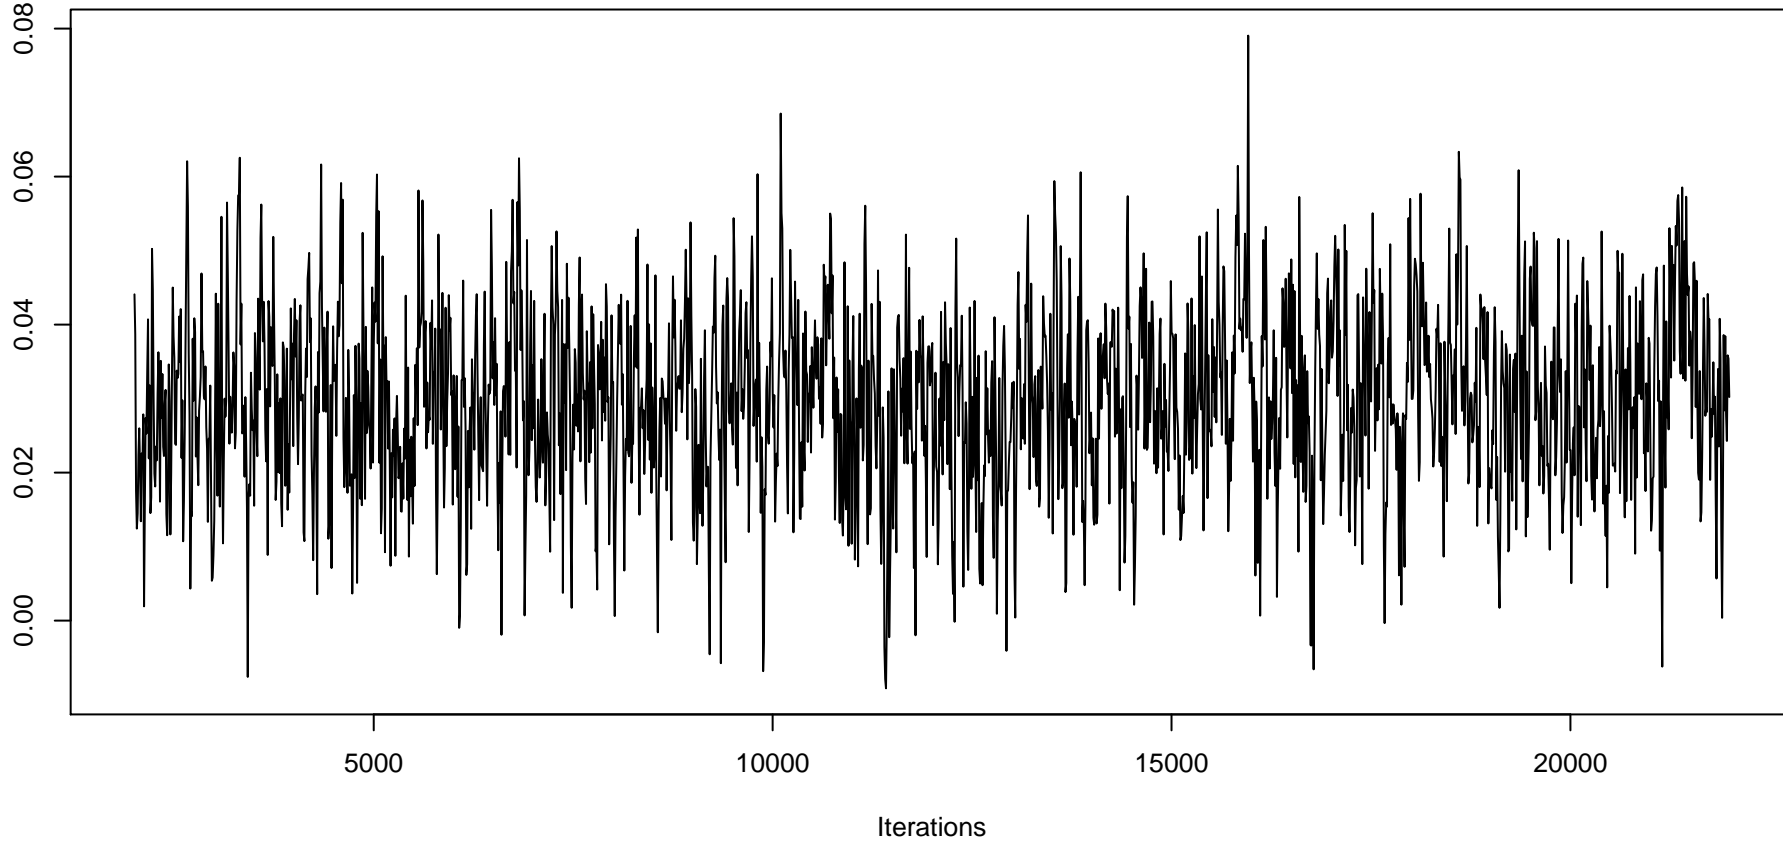

**Density of urban**

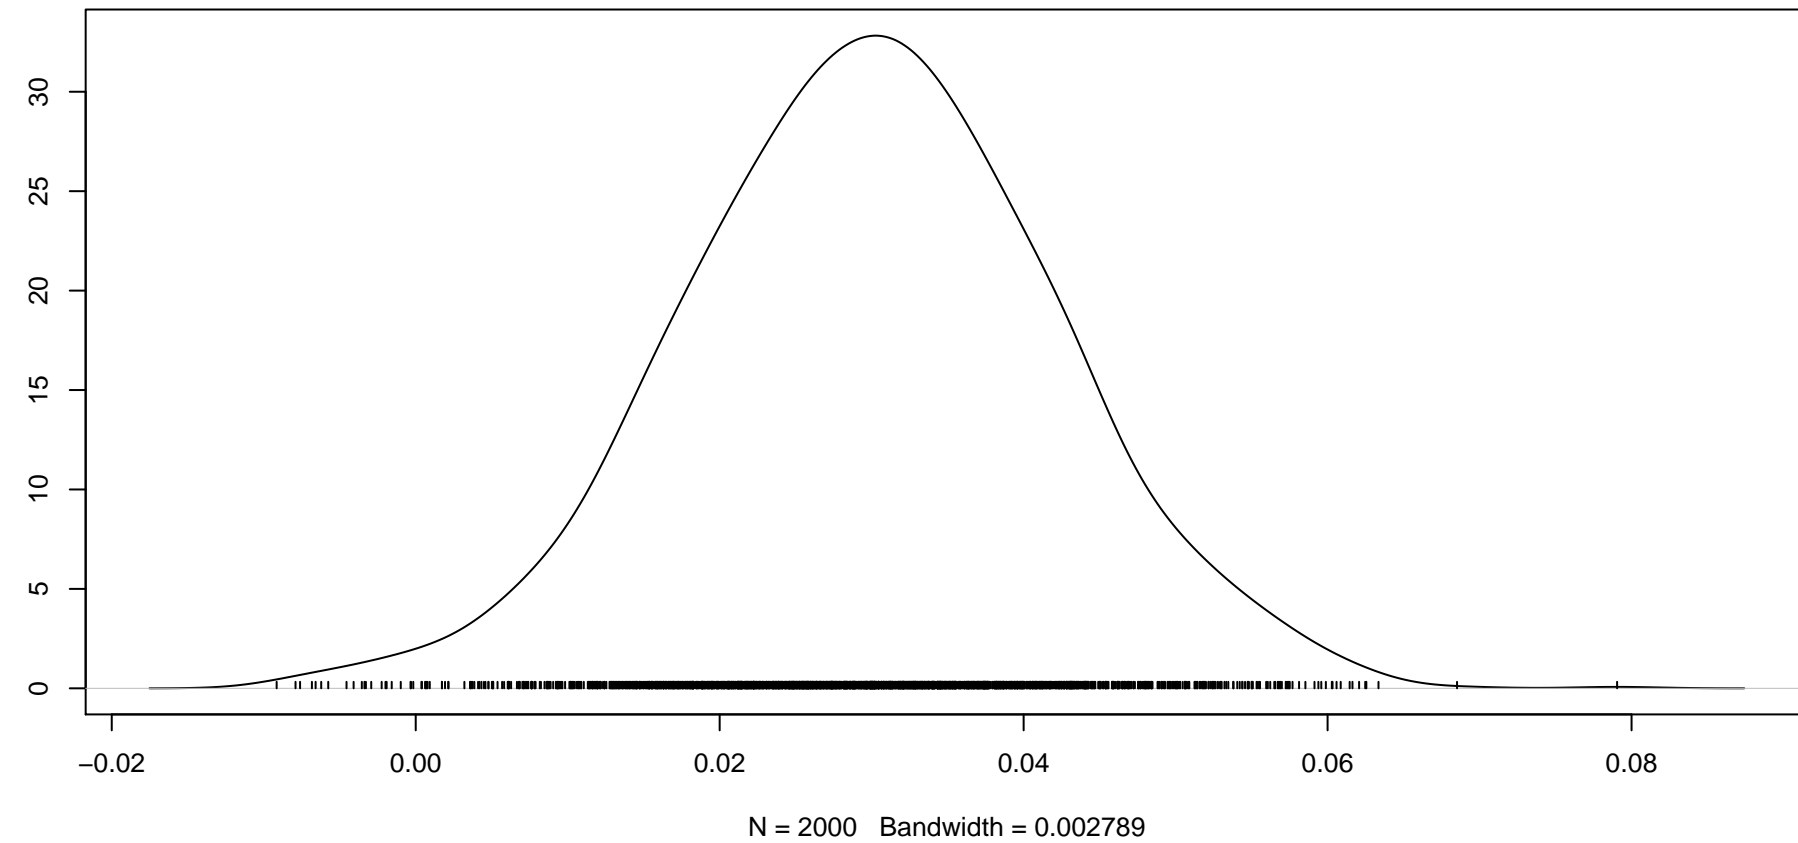

Supplement: ECE3-8-667-s002.pdf [file ECE3-8-667-s002.pdf]
